# Supplementary material for: Genomic analysis identified a potential novel molecular mechanism for high-altitude adaptation in sheep at the Himalayas
Source: PubMed Central journal article supplement (PMC4995607; doi:10.1038/srep29963), 2016-07-22
Supplement: srep29963-s1.pdf [file srep29963-s1.pdf]

## **Genomic analysis identified a potential novel molecular mechanism for high-altitude adaptation in sheep at the Himalayas**

Neena Amatya Gorkhali<sup>1,2,3,+</sup>, Kunzhe Dong<sup>1,3,+</sup>, Min Yang<sup>1,3</sup>, Shen Song<sup>1,3,4</sup>, Adiljian Kader<sup>1,3</sup>, Bhola Shankar Shrestha<sup>2</sup>, Xiaohong He<sup>1,3</sup>, Qianjun Zhao<sup>1,3</sup>, Yabin Pu<sup>1,3</sup>, Xiangchen Li<sup>1,3</sup>, James Kijas<sup>6</sup>, Weijun Guan<sup>1,3</sup>, Jianlin Han<sup>1,3,5</sup>, Lin Jiang<sup>1,3,\*</sup>, Yuehui Ma<sup>1,3,\*</sup>

<sup>1</sup>Institute of Animal Sciences, Chinese Academy of Agricultural Sciences (CAAS), No. 2 Yuanmingyuan West Road, Beijing 100193, China;

<sup>2</sup>Animal Breeding Division, National Animal Science Institute, Nepal Agriculture Research Council (NARC), Kathmandu, Nepal;

<sup>3</sup>CAAS-ILRI Joint Laboratory on Livestock and Forage Genetic Resources, Institute of Animal Science, Chinese Academy of Agricultural Sciences (CAAS), Beijing 100193, China;

<sup>4</sup>Department of Animal Genetics and Breeding, China Agricultural University, Beijing 100094, P. R. China;

<sup>5</sup>International Livestock Research Institute (ILRI), P.O. Box 30709, Nairobi 00100, Kenya

<sup>6</sup>CSIRO Livestock Industries, St Lucia, Brisbane, Qld, Australia

\*Correspondence author: Lin Jiang: [jianglin@caas.cn](mailto:jianglin@caas.cn); Yuehui Ma: [mayuehui@caas.cn](mailto:mayuehui@caas.cn)

<sup>+</sup>These authors contributed equally to this work

## Supplementary Figures S1 and S2

**Fig. S1. Decline in genome-wide linkage disequilibrium (LD) across and within breeds.** Genome-wide LD was estimated both within and across breeds, by calculating  $r^2$  values between all pairs of SNPs with inter-SNP distances of less than 1 Mb.

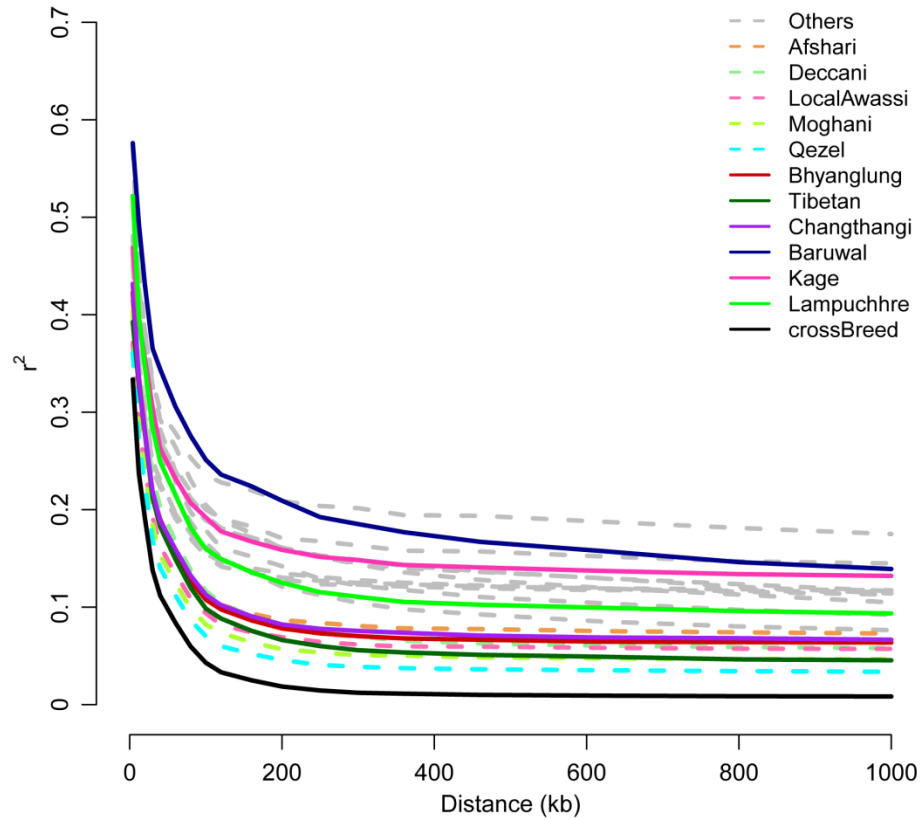

**Fig. S2. Comparison of significant SNPs identified in the four high-altitude sheep breeds.**

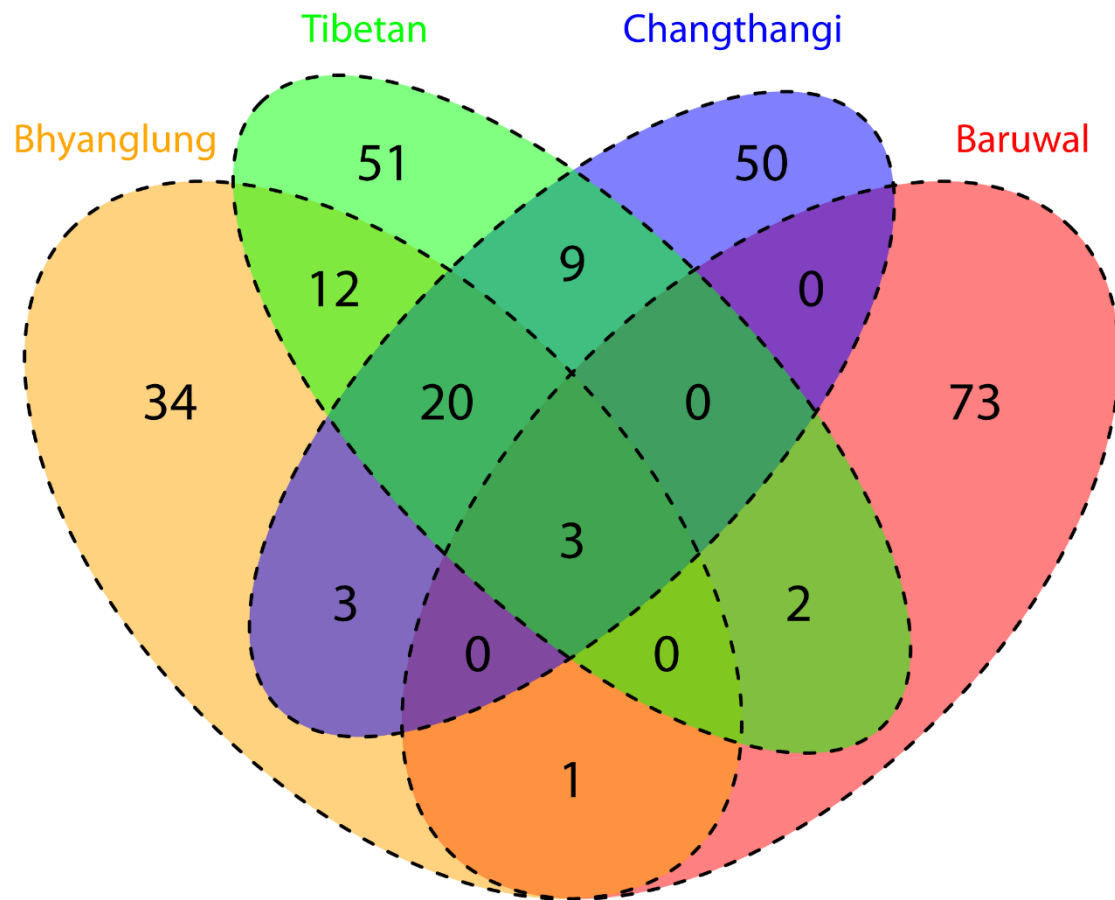

## Supplementary Tables S1-S12

**Table S1. Genetic differentiation ( $F_{ST}$  values) between high and low-altitude sheep breeds**

|                   | High | Bhyanglung | Tibetan | Changthangi | Baruwal |
|-------------------|------|------------|---------|-------------|---------|
| Low               |      |            |         |             |         |
| BangladeshiBGE    |      | 0.1098     | 0.1187  | 0.108       | 0.1739  |
| BangladeshiGarole |      | 0.1175     | 0.1263  | 0.1165      | 0.1841  |
| Deccani           |      | 0.0809     | 0.0914  | 0.0805      | 0.1479  |
| Garut             |      | 0.1119     | 0.1214  | 0.1112      | 0.1835  |
| IndianGarole      |      | 0.1347     | 0.1426  | 0.133       | 0.1991  |
| Kage              |      | 0.089      | 0.0988  | 0.0894      | 0.1482  |
| Lampuchhre        |      | 0.1124     | 0.1215  | 0.1114      | 0.1775  |
| Sumatra           |      | 0.125      | 0.1333  | 0.1236      | 0.1907  |

**Table S2. Significant SNPs identified in Bhyanglung sheep**

| Chr | SNP                     | Position         | Fst between Bhyanglung and |             |             |             |              |             |             |             | Di           |
|-----|-------------------------|------------------|----------------------------|-------------|-------------|-------------|--------------|-------------|-------------|-------------|--------------|
|     |                         |                  | BanglBGE                   | BanglGarole | Deccani     | Garut       | IndianGarole | Kage        | Lampuchhre  | Sumatra     |              |
| 1   | OAR1_15762141.1         | 15765887         | 0.59                       | 0.71        | 0.26        | 0.56        | 0.30         | 0.38        | 0.67        | 0.12        | 22.02        |
| 1   | OAR1_61237925.1         | 58019251         | 0.33                       | 0.38        | 0.46        | 0.59        | 0.68         | 0.19        | 0.79        | 0.22        | 22.20        |
| 1   | s43910.1                | 67062156         | 0.41                       | 0.70        | 0.11        | 0.66        | 0.60         | 0.39        | 0.24        | 0.60        | 22.24        |
| 1   | OAR1_72984979.1         | 68457284         | 0.58                       | 0.62        | 0.51        | 0.46        | 0.59         | 0.06        | 0.58        | 0.50        | 24.15        |
| 1   | <b>OAR1_107239370.1</b> | <b>99931717</b>  | <b>0.55</b>                | <b>0.69</b> | <b>0.50</b> | <b>0.46</b> | <b>0.68</b>  | <b>0.42</b> | <b>0.69</b> | <b>0.63</b> | <b>29.80</b> |
| 1   | <b>OAR1_107504871.1</b> | <b>100185774</b> | <b>0.72</b>                | <b>0.72</b> | <b>0.71</b> | <b>0.70</b> | <b>0.73</b>  | <b>0.69</b> | <b>0.72</b> | <b>0.56</b> | <b>37.45</b> |
| 1   | s31815.1                | 106855010        | 0.61                       | 0.50        | 0.63        | 0.13        | 0.38         | 0.49        | 0.37        | 0.38        | 21.74        |
| 1   | s57575.1                | 182640823        | 0.30                       | 0.59        | 0.34        | 0.35        | 0.50         | 0.63        | 0.25        | 0.64        | 22.16        |
| 1   | OAR1_197916874.1        | 183420073        | 0.42                       | 0.30        | 0.60        | 0.42        | 0.45         | 0.52        | 0.37        | 0.68        | 23.72        |
| 1   | OAR1_199252158.1        | 184627258        | 0.58                       | 0.64        | 0.48        | 0.37        | 0.74         | 0.74        | 0.50        | 0.76        | 31.44        |
| 1   | OAR1_232102593.1        | 215086209        | 0.51                       | 0.64        | 0.57        | 0.30        | 0.38         | 0.26        | 0.38        | 0.48        | 21.70        |
| 1   | s18320.1                | 243069237        | 0.73                       | 0.83        | 0.31        | 0.68        | 0.84         | -0.07       | 0.11        | 0.50        | 23.59        |
| 1   | OAR1_268122939.1        | 248275678        | 0.87                       | 0.74        | 0.59        | 0.24        | 0.56         | 0.24        | 0.51        | 0.47        | 26.92        |
| 2   | OAR2_1640701.1          | 2808512          | 0.69                       | 0.61        | 0.44        | 0.69        | 0.57         | 0.56        | 0.39        | 0.81        | 30.94        |
| 2   | s00336.1                | 10805401         | 0.29                       | 0.37        | 0.57        | 0.46        | 0.65         | 0.16        | 0.78        | 0.46        | 23.03        |
| 2   | s28736.1                | 13932966         | 0.43                       | 0.41        | 0.56        | 0.17        | 0.49         | 0.17        | 0.68        | 0.67        | 21.88        |
| 2   | s13817.1                | 42253856         | 0.66                       | 0.66        | 0.34        | 0.10        | 0.67         | 0.26        | 0.46        | 0.55        | 22.39        |
| 2   | OAR2_56383269.1         | 52536647         | 0.45                       | 0.64        | 0.75        | 0.08        | 0.16         | 0.37        | 0.57        | 0.48        | 21.96        |
| 2   | OAR2_64231337.1         | 59762935         | 0.36                       | 0.30        | 0.20        | 0.64        | 0.50         | 0.35        | 0.85        | 0.68        | 23.75        |
| 2   | OAR2_71530687.1         | 66963261         | 0.58                       | 0.65        | 0.55        | 0.58        | 0.66         | 0.36        | 0.61        | 0.27        | 27.16        |
| 2   | s62463.1                | 72644072         | 0.49                       | 0.73        | 0.64        | 0.63        | 0.77         | 0.16        | 0.36        | 0.70        | 28.54        |
| 2   | s48950.1                | 88900607         | 0.81                       | 0.67        | 0.49        | 0.13        | 0.71         | 0.69        | 0.62        | 0.81        | 32.30        |
| 2   | OAR2_107945014.1        | 100364649        | 0.66                       | 0.69        | 0.27        | 0.59        | 0.45         | 0.35        | 0.17        | 0.71        | 23.82        |

|   |                  |           |      |      |      |      |      |      |      |      |       |
|---|------------------|-----------|------|------|------|------|------|------|------|------|-------|
| 2 | OAR2_118498709.1 | 110291246 | 0.44 | 0.58 | 0.41 | 0.62 | 0.62 | 0.53 | 0.63 | 0.35 | 26.51 |
| 2 | s64230.1         | 110743186 | 0.39 | 0.60 | 0.69 | 0.42 | 0.43 | 0.59 | 0.65 | 0.30 | 26.40 |
| 2 | OAR2_143916009.1 | 135304995 | 0.53 | 0.63 | 0.60 | 0.64 | 0.67 | 0.54 | 0.43 | 0.66 | 30.51 |
| 2 | OAR2_161368305.1 | 152215629 | 0.47 | 0.64 | 0.23 | 0.69 | 0.63 | 0.28 | 0.16 | 0.69 | 22.86 |
| 2 | OAR2_173495274.1 | 163845372 | 0.82 | 0.85 | 0.30 | 0.68 | 0.78 | 0.73 | 0.51 | 0.65 | 34.94 |
| 2 | s33598.1         | 217834549 | 0.70 | 0.70 | 0.27 | 0.35 | 0.61 | 0.58 | 0.33 | 0.14 | 22.66 |
| 2 | s27557.1         | 220053519 | 0.58 | 0.81 | 0.48 | 0.59 | 0.71 | 0.24 | 0.64 | 0.46 | 28.66 |
| 2 | OAR2_232672067.1 | 220103004 | 0.19 | 0.50 | 0.43 | 0.66 | 0.12 | 0.47 | 0.77 | 0.67 | 23.85 |
| 2 | s41966.1         | 237813990 | 0.45 | 0.77 | 0.75 | 0.08 | 0.68 | 0.60 | 0.61 | 0.72 | 30.57 |
| 2 | OAR2_251166495.1 | 237822440 | 0.38 | 0.72 | 0.69 | 0.03 | 0.62 | 0.52 | 0.54 | 0.66 | 26.58 |
| 2 | s10664.1         | 244129054 | 0.50 | 0.57 | 0.34 | 0.29 | 0.66 | 0.21 | 0.36 | 0.72 | 21.92 |
| 3 | OAR3_3313767.1   | 3473658   | 0.65 | 0.49 | 0.71 | 0.77 | 0.55 | 0.30 | 0.24 | 0.53 | 27.23 |
| 3 | s61491.1         | 9428422   | 0.38 | 0.76 | 0.33 | 0.67 | 0.88 | 0.55 | 0.77 | 0.55 | 31.53 |
| 3 | OAR3_44467884.1  | 41551185  | 0.60 | 0.34 | 0.22 | 0.57 | 0.26 | 0.55 | 0.53 | 0.63 | 23.03 |
| 3 | s72391.1         | 41793029  | 0.77 | 0.63 | 0.44 | 0.58 | 0.73 | 0.38 | 0.77 | 0.74 | 32.75 |
| 3 | OAR3_45498973.1  | 42501688  | 0.53 | 0.59 | 0.42 | 0.28 | 0.47 | 0.53 | 0.59 | 0.24 | 22.80 |
| 3 | OAR3_60234650.1  | 56972116  | 0.63 | 0.42 | 0.44 | 0.84 | 0.51 | 0.28 | 0.07 | 0.82 | 24.97 |
| 3 | OAR3_66317995.1  | 62704565  | 0.78 | 0.40 | 0.25 | 0.58 | 0.42 | 0.35 | 0.49 | 0.45 | 22.89 |
| 3 | OAR3_68631966.1  | 64971662  | 0.63 | 0.47 | 0.53 | 0.58 | 0.73 | 0.48 | 0.47 | 0.30 | 26.81 |
| 3 | s17646.1         | 90772017  | 0.21 | 0.32 | 0.85 | 0.45 | 0.44 | 0.01 | 0.75 | 0.53 | 22.16 |
| 3 | s29393.1         | 92401501  | 0.45 | 0.47 | 0.41 | 0.29 | 0.62 | 0.69 | 0.43 | 0.74 | 25.82 |
| 3 | OAR3_98186564.1  | 92497164  | 0.28 | 0.58 | 0.51 | 0.39 | 0.69 | 0.40 | 0.36 | 0.54 | 23.19 |
| 3 | s67952.1         | 93522006  | 0.17 | 0.55 | 0.44 | 0.83 | 0.50 | 0.38 | 0.38 | 0.41 | 22.54 |
| 3 | s64982.1         | 93725974  | 0.87 | 0.68 | 0.36 | 0.21 | 0.34 | 0.32 | 0.38 | 0.54 | 22.81 |
| 3 | OAR3_119041340.1 | 111746572 | 0.51 | 0.60 | 0.25 | 0.47 | 0.67 | 0.48 | 0.22 | 0.36 | 21.65 |
| 3 | OAR3_135295238.1 | 126604459 | 0.53 | 0.61 | 0.59 | 0.58 | 0.83 | 0.15 | 0.36 | 0.50 | 26.04 |

|   |                  |           |      |      |      |      |      |      |      |      |       |
|---|------------------|-----------|------|------|------|------|------|------|------|------|-------|
| 3 | s33601.1         | 133314721 | 0.46 | 0.32 | 0.54 | 0.34 | 0.45 | 0.55 | 0.52 | 0.60 | 23.78 |
| 3 | OAR3_150785833.1 | 140970538 | 0.69 | 0.38 | 0.65 | 0.68 | 0.36 | 0.41 | 0.77 | 0.82 | 31.22 |
| 3 | OAR3_165009241.1 | 154213690 | 0.10 | 0.07 | 0.83 | 0.73 | 0.01 | 0.35 | 0.89 | 0.63 | 23.10 |
| 3 | OAR3_171926505.1 | 160720849 | 0.60 | 0.64 | 0.54 | 0.68 | 0.26 | 0.46 | 0.33 | 0.53 | 25.81 |
| 3 | OAR3_173071993.1 | 161858143 | 0.66 | 0.66 | 0.22 | 0.36 | 0.67 | 0.45 | 0.49 | 0.52 | 25.04 |
| 3 | s35132.1         | 163307018 | 0.70 | 0.79 | 0.47 | 0.65 | 0.86 | 0.74 | 0.25 | 0.36 | 31.46 |
| 3 | s05280.1         | 178423049 | 0.72 | 0.50 | 0.44 | 0.24 | 0.11 | 0.70 | 0.69 | 0.41 | 24.30 |
| 3 | s70839.1         | 186368226 | 0.48 | 0.48 | 0.45 | 0.40 | 0.60 | 0.46 | 0.48 | 0.51 | 24.22 |
| 3 | s17644.1         | 213209196 | 0.74 | 0.46 | 0.56 | 0.27 | 0.83 | 0.18 | 0.53 | 0.27 | 23.83 |
| 3 | s38073.1         | 218664932 | 0.60 | 0.44 | 0.37 | 0.13 | 0.66 | 0.38 | 0.53 | 0.58 | 22.67 |
| 3 | s50255.1         | 220327385 | 0.38 | 0.41 | 0.59 | 0.55 | 0.65 | 0.75 | 0.87 | 0.00 | 27.47 |
| 4 | OAR4_14093754.1  | 13881724  | 0.51 | 0.62 | 0.55 | 0.25 | 0.63 | 0.28 | 0.62 | 0.43 | 24.22 |
| 4 | OAR4_14572146.1  | 14355529  | 0.61 | 0.53 | 0.36 | 0.43 | 0.46 | 0.31 | 0.66 | 0.71 | 25.51 |
| 4 | OAR4_18596826.1  | 18345021  | 0.62 | 0.62 | 0.41 | 0.29 | 0.26 | 0.49 | 0.33 | 0.62 | 22.65 |
| 4 | OAR4_51020419.1  | 48201750  | 0.35 | 0.49 | 0.54 | 0.46 | 0.59 | 0.55 | 0.37 | 0.73 | 25.82 |
| 4 | s32219.1         | 48304254  | 0.55 | 0.38 | 0.51 | 0.93 | 0.34 | 0.59 | 0.89 | 0.98 | 34.36 |
| 4 | OAR4_51241289.1  | 48423060  | 0.79 | 0.57 | 0.71 | 0.90 | 0.40 | 0.65 | 0.94 | 0.98 | 40.43 |
| 4 | OAR4_51315739.1  | 48500494  | 0.55 | 0.33 | 0.57 | 0.79 | 0.25 | 0.42 | 0.84 | 0.89 | 30.27 |
| 4 | OAR4_51346813.1  | 48531186  | 0.77 | 0.56 | 0.80 | 0.77 | 0.75 | 0.59 | 0.87 | 0.87 | 40.62 |
| 4 | OAR4_51441757.1  | 48627750  | 0.68 | 0.68 | 0.62 | 0.54 | 0.69 | 0.64 | 0.68 | 0.68 | 34.59 |
| 4 | OAR4_51489408.1  | 48669962  | 0.89 | 0.82 | 0.88 | 0.82 | 0.92 | 0.90 | 0.92 | 0.91 | 48.98 |
| 4 | OAR4_80605717.1  | 76007878  | 0.47 | 0.66 | 0.42 | 0.30 | 0.76 | 0.65 | 0.77 | 0.52 | 29.23 |
| 4 | s11336.1         | 87572495  | 0.60 | 0.60 | 0.58 | 0.57 | 0.61 | 0.42 | 0.60 | 0.59 | 29.55 |
| 5 | s45523.1         | 9446854   | 0.51 | 0.39 | 0.65 | 0.40 | 0.47 | 0.34 | 0.42 | 0.32 | 21.79 |
| 5 | s29567.1         | 16203101  | 0.41 | 0.74 | 0.75 | 0.21 | 0.72 | 0.22 | 0.68 | 0.07 | 23.96 |
| 5 | OAR5_19894072.1  | 17340888  | 0.52 | 0.49 | 0.34 | 0.22 | 0.75 | 0.39 | 0.87 | 0.40 | 24.64 |

|   |                  |           |      |      |      |      |      |      |       |      |       |
|---|------------------|-----------|------|------|------|------|------|------|-------|------|-------|
| 5 | OAR5_35737637.1  | 32189253  | 0.61 | 0.46 | 0.54 | 0.04 | 0.70 | 0.51 | 0.57  | 0.63 | 25.83 |
| 5 | OAR5_42039615.1  | 38259222  | 0.63 | 0.54 | 0.24 | 0.68 | 0.33 | 0.50 | 0.21  | 0.59 | 22.92 |
| 5 | s23065.1         | 41357859  | 0.61 | 0.75 | 0.40 | 0.16 | 0.54 | 0.62 | 0.75  | 0.60 | 28.50 |
| 5 | OAR5_53463172.1  | 49201835  | 0.42 | 0.58 | 0.75 | 0.59 | 0.20 | 0.59 | 0.72  | 0.38 | 27.90 |
| 5 | OAR5_55949772.1  | 51535099  | 0.60 | 0.61 | 0.09 | 0.62 | 0.40 | 0.41 | 0.34  | 0.67 | 22.80 |
| 5 | OAR5_56001782.1  | 51587928  | 0.65 | 0.55 | 0.60 | 0.65 | 0.51 | 0.40 | 0.28  | 0.52 | 26.66 |
| 5 | OAR5_94259136.1  | 86043483  | 0.44 | 0.31 | 0.26 | 0.27 | 0.63 | 0.63 | 0.56  | 0.64 | 23.10 |
| 5 | OAR5_108396019.1 | 99527999  | 0.57 | 0.51 | 0.36 | 0.60 | 0.68 | 0.27 | 0.51  | 0.40 | 24.04 |
| 6 | DU178311_404.1   | 36839547  | 0.29 | 0.58 | 0.47 | 0.52 | 0.60 | 0.67 | -0.03 | 0.46 | 21.96 |
| 6 | OAR6_49878575.1  | 44950513  | 0.54 | 0.57 | 0.43 | 0.50 | 0.59 | 0.40 | 0.19  | 0.57 | 23.35 |
| 6 | s55289.1         | 46602091  | 0.85 | 0.79 | 0.69 | 0.55 | 0.78 | 0.53 | 0.53  | 0.59 | 35.29 |
| 6 | s52112.1         | 89145977  | 0.56 | 0.56 | 0.37 | 0.44 | 0.57 | 0.29 | 0.59  | 0.55 | 24.37 |
| 6 | s21552.1         | 94639943  | 0.70 | 0.77 | 0.91 | 0.25 | 0.92 | 0.95 | 0.45  | 0.74 | 38.65 |
| 6 | OAR6_103985982.1 | 94749679  | 0.28 | 0.11 | 0.29 | 0.48 | 0.73 | 0.62 | 0.74  | 0.49 | 23.13 |
| 6 | OAR6_121352193.1 | 106834499 | 0.47 | 0.73 | 0.26 | 0.33 | 0.54 | 0.32 | 0.64  | 0.51 | 23.18 |
| 6 | OAR6_125621422.1 | 110561891 | 0.50 | 0.64 | 0.35 | 0.53 | 0.45 | 0.24 | 0.40  | 0.53 | 22.17 |
| 7 | s24872.1         | 15988141  | 0.46 | 0.44 | 0.68 | 0.70 | 0.80 | 0.72 | 0.32  | 0.68 | 31.77 |
| 7 | s18550.1         | 15995141  | 0.69 | 0.29 | 0.13 | 0.66 | 0.79 | 0.22 | 0.37  | 0.51 | 21.85 |
| 7 | OAR7_31901602.1  | 28210606  | 0.53 | 0.69 | 0.46 | 0.44 | 0.63 | 0.39 | 0.67  | 0.45 | 27.10 |
| 7 | OAR7_47161420.1  | 42551974  | 0.48 | 0.82 | 0.60 | 0.74 | 0.51 | 0.85 | 0.53  | 0.68 | 34.89 |
| 7 | OAR7_50297566.1  | 45575342  | 0.79 | 0.79 | 0.64 | 0.66 | 0.79 | 0.42 | 0.50  | 0.78 | 35.54 |
| 7 | OAR7_52060307.1  | 47264055  | 0.81 | 0.70 | 0.36 | 0.17 | 0.60 | 0.71 | 0.38  | 0.50 | 27.00 |
| 7 | s15898.1         | 56115836  | 0.55 | 0.55 | 0.44 | 0.52 | 0.56 | 0.46 | 0.40  | 0.55 | 25.41 |
| 7 | OAR7_63627909.1  | 57692469  | 0.55 | 0.45 | 0.62 | 0.30 | 0.43 | 0.73 | 0.61  | 0.68 | 28.48 |
| 7 | OAR7_63692612.1  | 57764872  | 0.71 | 0.74 | 0.80 | 0.55 | 0.63 | 0.85 | 0.63  | 0.76 | 38.59 |
| 7 | OAR7_63745942.1  | 57816492  | 0.89 | 0.87 | 0.98 | 0.75 | 0.98 | 0.95 | 0.98  | 0.98 | 51.47 |



|    |                  |          |      |      |      |      |      |      |      |      |       |
|----|------------------|----------|------|------|------|------|------|------|------|------|-------|
| 7  | OAR7_63814443.1  | 57875478 | 1.00 | 1.00 | 1.00 | 0.76 | 1.00 | 0.97 | 0.96 | 0.96 | 53.62 |
| 7  | OAR7_63848145.1  | 57915106 | 0.98 | 0.98 | 0.98 | 0.98 | 0.98 | 0.98 | 0.98 | 0.98 | 54.92 |
| 7  | OAR7_89553402.1  | 82197428 | 0.38 | 0.31 | 0.54 | 0.25 | 0.65 | 0.42 | 0.41 | 0.76 | 22.98 |
| 8  | OAR8_10421816.1  | 9380786  | 0.70 | 0.70 | 0.28 | 0.68 | 0.64 | 0.24 | 0.41 | 0.29 | 24.31 |
| 8  | OAR8_14883276.1  | 13331101 | 0.74 | 0.26 | 0.15 | 0.56 | 0.48 | 0.58 | 0.45 | 0.34 | 21.78 |
| 8  | OAR8_28235071.1  | 25787069 | 0.42 | 0.29 | 0.41 | 0.27 | 0.68 | 0.49 | 0.78 | 0.40 | 23.17 |
| 8  | OAR8_35722542.1  | 32877217 | 0.55 | 0.40 | 0.22 | 0.39 | 0.52 | 0.41 | 0.55 | 0.54 | 21.67 |
| 8  | OAR8_41046815.1  | 38108511 | 0.75 | 0.75 | 0.62 | 0.69 | 0.75 | 0.56 | 0.24 | 0.65 | 32.88 |
| 8  | OAR8_41067189.1  | 38129829 | 0.75 | 0.75 | 0.55 | 0.69 | 0.75 | 0.56 | 0.15 | 0.52 | 30.70 |
| 8  | OAR8_55339073.1  | 51474008 | 0.43 | 0.49 | 0.14 | 0.33 | 0.67 | 0.58 | 0.59 | 0.42 | 22.03 |
| 8  | OAR8_67469564.1  | 62674808 | 0.34 | 0.44 | 0.50 | 0.53 | 0.61 | 0.27 | 0.64 | 0.52 | 23.99 |
| 8  | OAR8_73347880.1  | 68365499 | 0.35 | 0.39 | 0.50 | 0.68 | 0.45 | 0.41 | 0.27 | 0.51 | 22.01 |
| 9  | OAR9_28628261.1  | 27355734 | 0.35 | 0.42 | 0.38 | 0.55 | 0.60 | 0.56 | 0.45 | 0.33 | 22.54 |
| 9  | OAR9_57584625.1  | 54900341 | 0.26 | 0.56 | 0.47 | 0.21 | 0.70 | 0.24 | 0.66 | 0.57 | 22.46 |
| 9  | s70965.1         | 57575579 | 0.34 | 0.35 | 0.52 | 0.21 | 0.62 | 0.46 | 0.56 | 0.54 | 22.32 |
| 9  | OAR9_82428531.1  | 77756891 | 0.48 | 0.79 | 0.33 | 0.30 | 0.36 | 0.36 | 0.74 | 0.84 | 26.41 |
| 10 | OAR10_10143630.1 | 11735682 | 0.38 | 0.44 | 0.64 | 0.69 | 0.58 | 0.06 | 0.24 | 0.62 | 22.32 |
| 10 | OAR10_18125946.1 | 19014824 | 0.58 | 0.31 | 0.44 | 0.36 | 0.77 | 0.61 | 0.27 | 0.22 | 21.97 |
| 10 | OAR10_29092520.1 | 29054709 | 0.58 | 0.47 | 0.38 | 0.18 | 0.50 | 0.73 | 0.72 | 0.43 | 25.33 |
| 10 | OAR10_29469450.1 | 29436435 | 0.75 | 0.75 | 0.73 | 0.47 | 0.72 | 0.67 | 0.68 | 0.71 | 36.81 |
| 10 | OAR10_29511510.1 | 29476678 | 0.92 | 0.92 | 0.91 | 0.91 | 0.92 | 0.90 | 0.92 | 0.89 | 50.62 |
| 10 | OAR10_29538398.1 | 29502667 | 0.87 | 0.93 | 0.21 | 0.87 | 0.55 | 0.75 | 0.89 | 0.93 | 40.07 |
| 10 | s18834.1         | 29806294 | 0.68 | 0.68 | 0.40 | 0.39 | 0.50 | 0.25 | 0.23 | 0.64 | 23.19 |
| 10 | s68983.1         | 30618253 | 0.58 | 0.34 | 0.62 | 0.50 | 0.47 | 0.32 | 0.65 | 0.21 | 23.18 |
| 10 | s12004.1         | 30674002 | 0.39 | 0.29 | 0.32 | 0.67 | 0.71 | 0.25 | 0.70 | 0.38 | 22.58 |
| 10 | OAR10_30746533.1 | 30700853 | 0.51 | 0.70 | 0.65 | 0.42 | 0.68 | 0.09 | 0.70 | 0.27 | 25.30 |

|    |                    |          |      |      |      |      |      |      |      |       |       |
|----|--------------------|----------|------|------|------|------|------|------|------|-------|-------|
| 10 | OAR10_49074172.1   | 48300368 | 0.55 | 0.60 | 0.44 | 0.15 | 0.58 | 0.48 | 0.76 | 0.13  | 23.11 |
| 10 | OAR10_55185347.1   | 54046513 | 0.75 | 0.55 | 0.47 | 0.36 | 0.73 | 0.45 | 0.09 | 0.43  | 23.91 |
| 10 | OAR10_57152217.1   | 56010798 | 0.84 | 0.77 | 0.68 | 0.82 | 0.73 | 0.38 | 0.64 | 0.76  | 37.54 |
| 10 | OAR10_61672235.1   | 60158728 | 0.40 | 0.40 | 0.60 | 0.58 | 0.90 | 0.87 | 0.50 | 0.38  | 30.44 |
| 11 | s30798.1           | 7858660  | 0.79 | 0.67 | 0.64 | 0.15 | 0.44 | 0.57 | 0.37 | 0.18  | 24.28 |
| 11 | s36598.1           | 7898325  | 0.85 | 0.48 | 0.47 | 0.55 | 0.50 | 0.59 | 0.22 | 0.17  | 24.26 |
| 11 | OAR11_19632538.1   | 19223203 | 0.72 | 0.59 | 0.46 | 0.51 | 0.73 | 0.45 | 0.53 | 0.56  | 29.32 |
| 11 | s17310.1           | 19385272 | 0.77 | 0.64 | 0.74 | 0.31 | 0.11 | 0.35 | 0.82 | 0.60  | 28.38 |
| 11 | OAR11_19800228_X.1 | 19397667 | 0.73 | 0.64 | 0.64 | 0.21 | 0.21 | 0.18 | 0.70 | 0.54  | 24.31 |
| 11 | OAR11_23673049.1   | 22780752 | 0.79 | 0.79 | 0.64 | 0.63 | 0.80 | 0.50 | 0.76 | 0.69  | 37.33 |
| 11 | s41017.1           | 22814442 | 0.79 | 0.79 | 0.61 | 0.67 | 0.80 | 0.46 | 0.76 | 0.69  | 36.98 |
| 11 | OAR11_27654920.1   | 26421905 | 0.57 | 0.57 | 0.24 | 0.41 | 0.58 | 0.53 | 0.21 | 0.57  | 22.51 |
| 11 | s72626.1           | 26872280 | 0.66 | 0.66 | 0.56 | 0.36 | 0.63 | 0.09 | 0.52 | 0.45  | 24.52 |
| 11 | OAR11_35138896.1   | 32905812 | 0.67 | 0.67 | 0.40 | 0.28 | 0.56 | 0.43 | 0.70 | -0.02 | 22.98 |
| 11 | s60757.1           | 39628891 | 0.73 | 0.50 | 0.26 | 0.27 | 0.18 | 0.54 | 0.42 | 0.72  | 22.19 |
| 11 | OAR11_43313971.1   | 40826416 | 0.57 | 0.44 | 0.39 | 0.45 | 0.08 | 0.47 | 0.60 | 0.56  | 22.09 |
| 11 | s46121.1           | 42992902 | 0.93 | 0.82 | 0.11 | 0.27 | 0.64 | 0.36 | 0.00 | 0.80  | 23.93 |
| 12 | OAR12_39493157.1   | 35320580 | 0.65 | 0.60 | 0.58 | 0.71 | 0.83 | 0.30 | 0.51 | 0.81  | 32.35 |
| 12 | OAR12_43331187.1   | 38923821 | 0.53 | 0.82 | 0.60 | 0.35 | 0.87 | 0.49 | 0.35 | 0.69  | 30.45 |
| 12 | OAR12_43408733.1   | 39002907 | 0.64 | 0.56 | 0.51 | 0.28 | 0.66 | 0.35 | 0.30 | 0.84  | 25.96 |
| 12 | s27978.1           | 45732811 | 0.51 | 0.25 | 0.36 | 0.81 | 0.72 | 0.51 | 0.27 | 0.63  | 25.40 |
| 12 | s21761.1           | 47186720 | 0.25 | 0.71 | 0.26 | 0.18 | 0.69 | 0.26 | 0.71 | 0.61  | 22.16 |
| 12 | OAR12_68075884.1   | 61642822 | 0.54 | 0.64 | 0.58 | 0.53 | 0.62 | 0.17 | 0.64 | 0.27  | 25.08 |
| 12 | s62974.1           | 69228088 | 0.61 | 0.48 | 0.51 | 0.43 | 0.47 | 0.62 | 0.20 | 0.79  | 26.14 |
| 13 | s14792.1           | 32586633 | 0.75 | 0.50 | 0.45 | 0.62 | 0.44 | 0.34 | 0.47 | 0.11  | 22.88 |
| 13 | OAR13_35982442.1   | 32625552 | 0.78 | 0.39 | 0.41 | 0.33 | 0.52 | 0.42 | 0.50 | 0.18  | 21.82 |

|    |                  |          |      |      |      |      |      |      |      |      |       |
|----|------------------|----------|------|------|------|------|------|------|------|------|-------|
| 13 | OAR13_38906100.1 | 35507432 | 0.59 | 0.59 | 0.40 | 0.79 | 0.53 | 0.27 | 0.32 | 0.41 | 24.21 |
| 13 | OAR13_51387503.1 | 48147260 | 0.63 | 0.41 | 0.36 | 0.33 | 0.69 | 0.32 | 0.79 | 0.72 | 26.63 |
| 13 | s14721.1         | 56428019 | 0.54 | 0.63 | 0.72 | 0.46 | 0.48 | 0.53 | 0.09 | 0.51 | 25.41 |
| 13 | s11373.1         | 61563593 | 0.66 | 0.77 | 0.01 | 0.61 | 0.67 | 0.21 | 0.43 | 0.74 | 24.87 |
| 13 | OAR13_81527927.1 | 75702438 | 0.72 | 0.80 | 0.18 | 0.39 | 0.60 | 0.35 | 0.25 | 0.83 | 25.40 |
| 13 | s75919.1         | 78004271 | 0.54 | 0.61 | 0.43 | 0.34 | 0.65 | 0.31 | 0.61 | 0.36 | 23.81 |
| 14 | s71975.1         | 16349731 | 0.56 | 0.71 | 0.41 | 0.37 | 0.32 | 0.70 | 0.29 | 0.55 | 24.68 |
| 15 | OAR15_13425521.1 | 13417873 | 0.74 | 0.85 | 0.36 | 0.16 | 0.83 | 0.66 | 0.74 | 0.32 | 30.03 |
| 15 | OAR15_22514728.1 | 21594492 | 0.67 | 0.56 | 0.29 | 0.53 | 0.25 | 0.55 | 0.22 | 0.49 | 21.83 |
| 15 | OAR15_44332191.1 | 42207222 | 0.66 | 0.66 | 0.56 | 0.03 | 0.67 | 0.62 | 0.66 | 0.32 | 26.91 |
| 15 | OAR15_80616593.1 | 74407015 | 0.50 | 0.59 | 0.26 | 0.55 | 0.44 | 0.41 | 0.18 | 0.65 | 21.74 |
| 16 | s24768.1         | 4731279  | 0.55 | 0.55 | 0.22 | 0.39 | 0.56 | 0.37 | 0.48 | 0.47 | 21.73 |
| 16 | OAR16_33317775.1 | 30655866 | 0.36 | 0.74 | 0.47 | 0.39 | 0.68 | 0.41 | 0.53 | 0.71 | 27.06 |
| 16 | s59565.1         | 30667706 | 0.39 | 0.66 | 0.53 | 0.55 | 0.57 | 0.34 | 0.37 | 0.65 | 25.57 |
| 16 | OAR16_33435828.1 | 30720540 | 0.59 | 0.79 | 0.57 | 0.47 | 0.70 | 0.22 | 0.62 | 0.65 | 29.47 |
| 16 | s15191.1         | 39007570 | 0.61 | 0.48 | 0.62 | 0.43 | 0.63 | 0.52 | 0.61 | 0.51 | 28.59 |
| 16 | OAR16_69511009.1 | 63750355 | 0.43 | 0.70 | 0.50 | 0.35 | 0.82 | 0.47 | 0.41 | 0.10 | 23.58 |
| 16 | s53565.1         | 70710282 | 0.85 | 0.71 | 0.27 | 0.08 | 0.80 | 0.15 | 0.53 | 0.65 | 24.74 |
| 16 | s51002.1         | 70900966 | 0.69 | 0.74 | 0.32 | 0.74 | 0.83 | 0.18 | 0.45 | 0.36 | 26.97 |
| 16 | s37581.1         | 70922464 | 0.69 | 0.74 | 0.32 | 0.61 | 0.83 | 0.18 | 0.45 | 0.36 | 26.01 |
| 17 | OAR17_5338968.1  | 4822132  | 0.62 | 0.62 | 0.60 | 0.39 | 0.63 | 0.58 | 0.62 | 0.50 | 29.60 |
| 17 | OAR17_28390642.1 | 25862600 | 0.53 | 0.55 | 0.75 | 0.24 | 0.73 | 0.48 | 0.63 | 0.63 | 29.64 |
| 17 | OAR17_55001652.1 | 50523309 | 0.70 | 0.67 | 0.38 | 0.43 | 0.74 | 0.12 | 0.21 | 0.73 | 24.46 |
| 17 | OAR17_64119946.1 | 58691585 | 0.51 | 0.65 | 0.47 | 0.22 | 0.47 | 0.56 | 0.42 | 0.26 | 22.16 |
| 18 | DU486946_262.1   | 14116240 | 0.49 | 0.56 | 0.38 | 0.57 | 0.61 | 0.34 | 0.56 | 0.59 | 25.53 |
| 18 | s10918.1         | 15573541 | 0.49 | 0.53 | 0.51 | 0.41 | 0.54 | 0.31 | 0.53 | 0.45 | 23.52 |

|    |                   |          |      |      |      |      |      |      |      |      |       |
|----|-------------------|----------|------|------|------|------|------|------|------|------|-------|
| 18 | s31152.1          | 19342316 | 0.51 | 0.45 | 0.39 | 0.07 | 0.94 | 0.45 | 0.63 | 0.41 | 23.72 |
| 18 | s12590.1          | 20040105 | 0.81 | 0.58 | 0.50 | 0.39 | 0.79 | 0.53 | 0.69 | 0.43 | 30.70 |
| 18 | s53519.1          | 29717895 | 0.57 | 0.39 | 0.63 | 0.49 | 0.32 | 0.35 | 0.69 | 0.43 | 24.48 |
| 18 | OAR18_41416894.1  | 38891583 | 0.78 | 0.52 | 0.29 | 0.42 | 0.76 | 0.49 | 0.50 | 0.08 | 23.90 |
| 18 | s48176.1          | 67289143 | 0.66 | 0.72 | 0.67 | 0.06 | 0.55 | 0.45 | 0.66 | 0.37 | 26.51 |
| 19 | OAR19_4318651.1   | 4077028  | 0.61 | 0.63 | 0.65 | 0.61 | 0.46 | 0.58 | 0.20 | 0.55 | 27.87 |
| 19 | OAR19_36413643.1  | 34817411 | 0.62 | 0.33 | 0.55 | 0.40 | 0.69 | 0.00 | 0.44 | 0.71 | 22.88 |
| 19 | OAR19_36435815.1  | 34838172 | 0.61 | 0.28 | 0.48 | 0.64 | 0.74 | 0.08 | 0.50 | 0.67 | 24.77 |
| 19 | s66398.1          | 53965311 | 0.55 | 0.55 | 0.40 | 0.28 | 0.56 | 0.24 | 0.55 | 0.55 | 22.48 |
| 19 | s21513.1          | 55690132 | 0.61 | 0.47 | 0.18 | 0.40 | 0.68 | 0.61 | 0.61 | 0.22 | 23.43 |
| 19 | s20082.1          | 56296821 | 0.69 | 0.74 | 0.35 | 0.52 | 0.32 | 0.31 | 0.45 | 0.43 | 23.70 |
| 20 | OAR20_9024546_X.1 | 8893097  | 0.62 | 0.62 | 0.33 | 0.47 | 0.53 | 0.58 | 0.55 | 0.50 | 26.71 |
| 20 | OAR20_9818283.1   | 9702838  | 0.40 | 0.38 | 0.56 | 0.36 | 0.21 | 0.66 | 0.45 | 0.49 | 22.09 |
| 20 | OAR20_14826084.1  | 14045781 | 0.45 | 0.23 | 0.54 | 0.36 | 0.63 | 0.28 | 0.56 | 0.51 | 21.72 |
| 20 | s59649.1          | 15613020 | 0.38 | 0.50 | 0.74 | 0.03 | 0.73 | 0.59 | 0.45 | 0.48 | 24.89 |
| 20 | OAR20_37437726.1  | 34168829 | 0.83 | 0.96 | 0.83 | 0.86 | 0.72 | 0.56 | 0.79 | 0.56 | 41.67 |
| 20 | s39515.1          | 34256995 | 0.61 | 0.72 | 0.78 | 0.71 | 0.48 | 0.38 | 0.69 | 0.28 | 30.62 |
| 20 | s61980.1          | 49930884 | 0.82 | 0.38 | 0.39 | 0.61 | 0.58 | 0.49 | 0.27 | 0.24 | 23.61 |
| 21 | OAR21_12460436.1  | 10911345 | 0.66 | 0.61 | 0.38 | 0.42 | 0.16 | 0.49 | 0.50 | 0.57 | 23.76 |
| 21 | s37379.1          | 30761604 | 0.42 | 0.64 | 0.51 | 0.41 | 0.48 | 0.31 | 0.71 | 0.66 | 26.21 |
| 21 | OAR21_47788299.1  | 43241397 | 0.55 | 0.42 | 0.38 | 0.68 | 0.38 | 0.34 | 0.17 | 0.77 | 22.61 |
| 21 | s65606.1          | 46568117 | 0.33 | 0.46 | 0.63 | 0.62 | 0.46 | 0.62 | 0.67 | 0.72 | 29.48 |
| 22 | OAR22_48326768.1  | 42969386 | 0.45 | 0.56 | 0.41 | 0.44 | 0.57 | 0.56 | 0.42 | 0.59 | 25.21 |
| 22 | s31685.1          | 43182266 | 0.37 | 0.70 | 0.47 | 0.71 | 0.26 | 0.29 | 0.46 | 0.49 | 23.30 |
| 23 | s69818.1          | 3075709  | 0.64 | 0.61 | 0.26 | 0.40 | 0.63 | 0.43 | 0.58 | 0.60 | 25.93 |
| 23 | OAR23_27112379.1  | 25972928 | 0.61 | 0.74 | 0.55 | 0.22 | 0.69 | 0.66 | 0.53 | 0.76 | 30.95 |

|    |                  |          |      |      |      |      |      |      |      |      |       |
|----|------------------|----------|------|------|------|------|------|------|------|------|-------|
| 23 | OAR23_33956409.1 | 32282622 | 0.18 | 0.50 | 0.59 | 0.55 | 0.55 | 0.37 | 0.68 | 0.29 | 23.28 |
| 23 | OAR23_34033124.1 | 32354664 | 0.52 | 0.70 | 0.64 | 0.70 | 0.76 | 0.57 | 0.64 | 0.54 | 33.48 |
| 23 | OAR23_34054014.1 | 32373968 | 0.47 | 0.67 | 0.45 | 0.60 | 0.74 | 0.39 | 0.55 | 0.55 | 28.16 |
| 23 | OAR23_34148286.1 | 32466427 | 0.41 | 0.70 | 0.61 | 0.60 | 0.27 | 0.29 | 0.50 | 0.49 | 24.46 |
| 23 | OAR23_37161222.1 | 35205521 | 0.40 | 0.36 | 0.66 | 0.24 | 0.46 | 0.60 | 0.62 | 0.32 | 23.21 |
| 23 | s17722.1         | 41141185 | 0.58 | 0.53 | 0.56 | 0.39 | 0.30 | 0.75 | 0.36 | 0.24 | 23.90 |
| 23 | s31567.1         | 51126740 | 0.72 | 0.50 | 0.73 | 0.79 | 0.68 | 0.56 | 0.78 | 0.27 | 33.53 |
| 23 | OAR23_63417651.1 | 59418377 | 0.58 | 0.68 | 0.44 | 0.16 | 0.69 | 0.21 | 0.61 | 0.64 | 24.85 |
| 24 | s59452.1         | 9721533  | 0.72 | 0.87 | 0.40 | 0.70 | 0.48 | 0.25 | 0.24 | 0.71 | 27.58 |
| 24 | s23797.1         | 36250095 | 0.32 | 0.30 | 0.51 | 0.38 | 0.21 | 0.74 | 0.66 | 0.38 | 21.99 |
| 25 | s42703.1         | 17652415 | 0.69 | 0.85 | 0.53 | 0.61 | 0.65 | 0.41 | 0.19 | 0.76 | 30.35 |
| 25 | s44878.1         | 32017122 | 0.59 | 0.20 | 0.77 | 0.17 | 0.55 | 0.18 | 0.62 | 0.46 | 22.04 |
| 26 | OAR26_17518698.1 | 14644438 | 0.74 | 0.31 | 0.26 | 0.46 | 0.68 | 0.62 | 0.47 | 0.24 | 23.52 |
| 26 | s33938.1         | 38189272 | 0.53 | 0.41 | 0.46 | 0.45 | 0.50 | 0.44 | 0.45 | 0.48 | 23.16 |

Notes: Significant SNPs located within merged genomic regions are colored "red".

**Table S3. Significant SNPs identified in Tibetan sheep**

| CHR | SNP               | Position  | Fst between Tibetan and |             |         |       |              |      |            |         | Di    |
|-----|-------------------|-----------|-------------------------|-------------|---------|-------|--------------|------|------------|---------|-------|
|     |                   |           | BanglBGE                | BanglGarole | Deccani | Garut | IndianGarole | Kage | Lampuchhre | Sumatra |       |
| 1   | s41913.1          | 2870378   | 0.59                    | 0.49        | 0.58    | 0.63  | 0.65         | 0.54 | 0.18       | 0.63    | 26.24 |
| 1   | OAR1_19174177.1   | 19048510  | 0.71                    | 0.80        | 0.29    | 0.54  | 0.38         | 0.69 | 0.25       | 0.17    | 22.96 |
| 1   | OAR1_20180147_X.1 | 20099767  | 0.77                    | 0.65        | 0.33    | 0.71  | 0.40         | 0.54 | 0.36       | 0.57    | 26.36 |
| 1   | OAR1_23447504.1   | 23376407  | 0.69                    | 0.62        | 0.44    | 0.53  | 0.60         | 0.29 | 0.20       | 0.52    | 23.07 |
| 1   | OAR1_41497208.1   | 40190989  | 0.24                    | 0.73        | 0.63    | 0.50  | 0.49         | 0.81 | 0.53       | 0.64    | 28.74 |
| 1   | OAR1_47719852.1   | 46013940  | 0.64                    | 0.59        | 0.35    | 0.60  | 0.36         | 0.47 | 0.42       | 0.48    | 23.29 |
| 1   | OAR1_51833033.1   | 49698300  | 0.49                    | 0.44        | 0.44    | 0.65  | 0.68         | 0.50 | 0.53       | 0.10    | 22.84 |
| 1   | OAR1_79060603.1   | 73928927  | 0.44                    | 0.54        | 0.68    | 0.59  | 0.52         | 0.49 | 0.44       | 0.42    | 25.28 |
| 1   | OAR1_79518018.1   | 74316221  | 0.63                    | 0.63        | 0.35    | 0.24  | 0.64         | 0.49 | 0.32       | 0.56    | 22.85 |
| 1   | OAR1_107239370.1  | 99931717  | 0.52                    | 0.65        | 0.48    | 0.43  | 0.64         | 0.40 | 0.65       | 0.59    | 26.57 |
| 1   | OAR1_107504871.1  | 100185774 | 0.82                    | 0.82        | 0.81    | 0.81  | 0.83         | 0.80 | 0.82       | 0.70    | 42.20 |
| 1   | OAR1_139735768.1  | 129024743 | 0.59                    | 0.79        | 0.44    | 0.72  | 0.45         | 0.58 | 0.28       | 0.33    | 25.42 |
| 1   | OAR1_150132797.1  | 139006820 | 0.68                    | 0.49        | 0.24    | 0.37  | 0.69         | 0.59 | 0.33       | 0.43    | 22.56 |
| 1   | s55347.1          | 183336939 | 0.57                    | 0.48        | 0.73    | 0.79  | 0.50         | 0.56 | 0.64       | 0.91    | 32.99 |
| 1   | OAR1_197916874.1  | 183420073 | 0.68                    | 0.57        | 0.82    | 0.70  | 0.69         | 0.78 | 0.64       | 0.87    | 37.38 |
| 1   | DU464218_590.1    | 183575060 | 0.26                    | 0.63        | 0.61    | 0.63  | 0.70         | 0.74 | 0.51       | 0.55    | 28.75 |
| 1   | OAR1_208134575.1  | 192746782 | 0.52                    | 0.50        | 0.15    | 0.69  | 0.66         | 0.41 | 0.57       | 0.48    | 23.46 |
| 1   | s18797.1          | 196009122 | 0.73                    | 0.65        | 0.58    | 0.20  | 0.59         | 0.65 | 0.54       | 0.85    | 29.98 |
| 1   | OAR1_268122939.1  | 248275678 | 0.95                    | 0.86        | 0.75    | 0.45  | 0.71         | 0.46 | 0.67       | 0.64    | 35.23 |
| 2   | OAR2_64231337.1   | 59762935  | 0.39                    | 0.33        | 0.22    | 0.67  | 0.54         | 0.39 | 0.86       | 0.71    | 24.42 |
| 2   | s48402.1          | 60634939  | 0.74                    | 0.41        | 0.55    | 0.56  | 0.60         | 0.05 | 0.74       | 0.61    | 25.69 |
| 2   | s62463.1          | 72644072  | 0.43                    | 0.65        | 0.57    | 0.56  | 0.69         | 0.12 | 0.31       | 0.63    | 23.47 |

|   |                   |           |      |      |      |      |      |      |      |      |       |
|---|-------------------|-----------|------|------|------|------|------|------|------|------|-------|
| 2 | OAR2_87543957.1   | 82346323  | 0.53 | 0.45 | 0.62 | 0.55 | 0.55 | 0.19 | 0.64 | 0.67 | 25.38 |
| 2 | OAR2_107787796.1  | 100199475 | 0.66 | 0.68 | 0.60 | 0.59 | 0.51 | 0.29 | 0.25 | 0.82 | 26.90 |
| 2 | OAR2_107945014.1  | 100364649 | 0.82 | 0.84 | 0.50 | 0.77 | 0.65 | 0.58 | 0.38 | 0.85 | 34.10 |
| 2 | OAR2_118498709.1  | 110291246 | 0.41 | 0.55 | 0.38 | 0.59 | 0.60 | 0.50 | 0.60 | 0.32 | 23.61 |
| 2 | OAR2_142924312.1  | 134460137 | 0.51 | 0.51 | 0.35 | 0.55 | 0.55 | 0.50 | 0.57 | 0.29 | 22.62 |
| 2 | OAR2_143916009.1  | 135304995 | 0.71 | 0.78 | 0.77 | 0.79 | 0.81 | 0.73 | 0.64 | 0.80 | 39.22 |
| 2 | OAR2_143949087.1  | 135337045 | 0.35 | 0.28 | 0.70 | 0.42 | 0.42 | 0.27 | 0.78 | 0.62 | 23.04 |
| 2 | OAR2_144244441.1  | 135636519 | 0.62 | 0.57 | 0.45 | 0.46 | 0.26 | 0.64 | 0.60 | 0.62 | 25.89 |
| 2 | OAR2_161368305.1  | 152215629 | 0.54 | 0.68 | 0.31 | 0.73 | 0.67 | 0.36 | 0.22 | 0.72 | 25.19 |
| 2 | OAR2_166865423.1  | 157367793 | 0.51 | 0.45 | 0.58 | 0.37 | 0.63 | 0.49 | 0.60 | 0.53 | 25.29 |
| 2 | s41966.1          | 237813990 | 0.47 | 0.78 | 0.75 | 0.07 | 0.69 | 0.61 | 0.63 | 0.73 | 29.66 |
| 2 | OAR2_251166495.1  | 237822440 | 0.44 | 0.75 | 0.73 | 0.05 | 0.67 | 0.58 | 0.60 | 0.70 | 28.21 |
| 2 | s10664.1          | 244129054 | 0.55 | 0.61 | 0.39 | 0.33 | 0.69 | 0.25 | 0.41 | 0.75 | 23.41 |
| 2 | OAR2_259153647.1  | 245206162 | 0.71 | 0.64 | 0.31 | 0.70 | 0.70 | 0.39 | 0.42 | 0.09 | 23.47 |
| 2 | s49602.1          | 248590000 | 0.69 | 0.62 | 0.33 | 0.51 | 0.21 | 0.62 | 0.20 | 0.78 | 23.74 |
| 3 | s61491.1          | 9428422   | 0.41 | 0.77 | 0.36 | 0.69 | 0.86 | 0.58 | 0.77 | 0.57 | 31.05 |
| 3 | s08514.1          | 39851694  | 0.88 | 0.80 | 0.35 | 0.53 | 0.49 | 0.84 | 0.80 | 0.32 | 31.74 |
| 3 | s05744.1          | 40080488  | 0.88 | 0.86 | 0.87 | 0.72 | 0.88 | 0.81 | 0.80 | 0.55 | 41.88 |
| 3 | OAR3_42867624.1   | 40124759  | 0.76 | 0.61 | 0.35 | 0.29 | 0.74 | 0.56 | 0.46 | 0.04 | 22.64 |
| 3 | OAR3_42907435.1   | 40163832  | 0.81 | 0.69 | 0.45 | 0.84 | 0.80 | 0.81 | 0.29 | 0.27 | 31.25 |
| 3 | s51799.1          | 40441564  | 0.67 | 0.62 | 0.71 | 0.75 | 0.45 | 0.73 | 0.53 | 0.77 | 33.59 |
| 3 | OAR3_43377195.1   | 40534487  | 0.41 | 0.46 | 0.68 | 0.57 | 0.41 | 0.88 | 0.78 | 0.22 | 27.84 |
| 3 | OAR3_43504420.1   | 40657958  | 0.84 | 0.84 | 0.70 | 0.69 | 0.42 | 0.71 | 0.61 | 0.69 | 35.53 |
| 3 | OAR3_43559179_X.1 | 40713016  | 0.86 | 0.69 | 0.74 | 0.86 | 0.66 | 0.47 | 0.88 | 0.54 | 36.82 |
| 3 | OAR3_43700480.1   | 40849521  | 0.60 | 0.65 | 0.71 | 0.91 | 0.60 | 0.70 | 0.69 | 0.77 | 36.37 |
| 3 | OAR3_43817056.1   | 40956953  | 0.62 | 0.62 | 0.66 | 0.48 | 0.46 | 0.65 | 0.79 | 0.76 | 32.14 |

|   |                  |           |      |      |      |      |      |      |      |      |       |
|---|------------------|-----------|------|------|------|------|------|------|------|------|-------|
| 3 | OAR3_44467884.1  | 41551185  | 0.64 | 0.42 | 0.31 | 0.62 | 0.35 | 0.61 | 0.59 | 0.67 | 25.54 |
| 3 | OAR3_63663119.1  | 60080759  | 0.44 | 0.23 | 0.57 | 0.47 | 0.49 | 0.56 | 0.39 | 0.70 | 23.11 |
| 3 | OAR3_74181493.1  | 70193170  | 0.24 | 0.36 | 0.60 | 0.77 | 0.58 | 0.25 | 0.52 | 0.77 | 24.55 |
| 3 | OAR3_79206128.1  | 74982457  | 0.65 | 0.32 | 0.73 | 0.53 | 0.31 | 0.08 | 0.56 | 0.59 | 22.52 |
| 3 | OAR3_84033269.1  | 79473981  | 0.44 | 0.44 | 0.34 | 1.00 | 0.67 | 0.23 | 0.38 | 0.40 | 22.91 |
| 3 | OAR3_84073899.1  | 79511180  | 0.44 | 0.44 | 0.37 | 1.00 | 0.67 | 0.23 | 0.64 | 0.40 | 25.09 |
| 3 | OAR3_96268784.1  | 90654749  | 0.25 | 0.44 | 0.82 | 0.35 | 0.45 | 0.04 | 0.73 | 0.71 | 22.63 |
| 3 | s64982.1         | 93725974  | 0.88 | 0.71 | 0.38 | 0.21 | 0.36 | 0.33 | 0.40 | 0.57 | 22.81 |
| 3 | OAR3_103689521.1 | 97441687  | 0.54 | 0.67 | 0.58 | 0.42 | 0.59 | 0.45 | 0.73 | 0.83 | 29.99 |
| 3 | OAR3_133503603.1 | 125162605 | 0.61 | 0.55 | 0.55 | 0.39 | 0.79 | 0.32 | 0.50 | 0.26 | 23.73 |
| 3 | OAR3_141010154.1 | 131915865 | 0.46 | 0.60 | 0.68 | 0.44 | 0.83 | 0.17 | 0.30 | 0.52 | 23.88 |
| 3 | OAR3_148780075.1 | 139002376 | 0.68 | 0.44 | 0.36 | 0.46 | 0.53 | 0.48 | 0.20 | 0.69 | 22.73 |
| 3 | OAR3_152693749.1 | 142848742 | 0.60 | 0.74 | 0.47 | 0.73 | 0.81 | 0.59 | 0.56 | 0.71 | 32.71 |
| 3 | OAR3_165009241.1 | 154213690 | 0.31 | 0.27 | 0.94 | 0.88 | 0.19 | 0.60 | 0.98 | 0.80 | 31.90 |
| 3 | s13456.1         | 156283498 | 0.67 | 0.63 | 0.10 | 0.76 | 0.69 | 0.57 | 0.32 | 0.22 | 23.32 |
| 3 | OAR3_194751219.1 | 180839858 | 0.54 | 0.62 | 0.52 | 0.38 | 0.38 | 0.14 | 0.64 | 0.66 | 22.95 |
| 3 | s70839.1         | 186368226 | 0.49 | 0.49 | 0.46 | 0.42 | 0.59 | 0.47 | 0.49 | 0.52 | 23.56 |
| 4 | OAR4_14572146.1  | 14355529  | 0.76 | 0.70 | 0.55 | 0.62 | 0.63 | 0.52 | 0.80 | 0.83 | 34.43 |
| 4 | s32219.1         | 48304254  | 0.49 | 0.30 | 0.44 | 0.86 | 0.26 | 0.52 | 0.84 | 0.91 | 28.75 |
| 4 | OAR4_51315739.1  | 48500494  | 0.56 | 0.34 | 0.58 | 0.78 | 0.25 | 0.43 | 0.82 | 0.86 | 28.76 |
| 4 | OAR4_51489408.1  | 48669962  | 0.95 | 0.89 | 0.95 | 0.90 | 0.97 | 0.96 | 0.97 | 0.97 | 50.74 |
| 4 | OAR4_80559387.1  | 75968047  | 0.29 | 0.49 | 0.32 | 0.45 | 0.65 | 0.28 | 0.67 | 0.74 | 22.78 |
| 4 | s11336.1         | 87572495  | 0.89 | 0.89 | 0.88 | 0.88 | 0.89 | 0.79 | 0.89 | 0.88 | 46.37 |
| 4 | OAR4_93024080.1  | 87602738  | 0.67 | 0.67 | 0.86 | 0.86 | 0.73 | 0.23 | 0.87 | 0.87 | 37.02 |
| 4 | OAR4_93067608.1  | 87649810  | 0.90 | 0.88 | 0.68 | 0.79 | 0.86 | 0.58 | 0.80 | 0.85 | 41.32 |
| 4 | s10721.1         | 94145887  | 0.65 | 0.45 | 0.50 | 0.72 | 0.40 | 0.42 | 0.50 | 0.21 | 23.23 |



|   |                   |           |      |      |      |       |      |      |       |      |       |
|---|-------------------|-----------|------|------|------|-------|------|------|-------|------|-------|
| 4 | s45195.1          | 105363106 | 0.76 | 0.66 | 0.66 | 0.51  | 0.33 | 0.20 | 0.78  | 0.67 | 28.37 |
| 5 | s58621.1          | 1431071   | 0.64 | 0.60 | 0.78 | -0.01 | 0.86 | 0.13 | 0.48  | 0.54 | 24.18 |
| 5 | s56763.1          | 15912332  | 0.65 | 0.77 | 0.61 | 0.48  | 0.68 | 0.38 | 0.27  | 0.33 | 25.41 |
| 5 | s29567.1          | 16203101  | 0.47 | 0.75 | 0.76 | 0.28  | 0.73 | 0.29 | 0.70  | 0.12 | 25.12 |
| 5 | s07332.1          | 16209393  | 0.66 | 0.61 | 0.82 | 0.17  | 0.54 | 0.35 | 0.91  | 0.29 | 27.19 |
| 5 | s38680.1          | 16520048  | 0.64 | 0.53 | 0.62 | 0.55  | 0.60 | 0.50 | 0.32  | 0.47 | 25.81 |
| 5 | OAR5_22471776_X.1 | 19778519  | 0.32 | 0.67 | 0.69 | 0.39  | 0.64 | 0.60 | 0.23  | 0.75 | 26.23 |
| 5 | s07525.1          | 19986771  | 0.66 | 0.45 | 0.17 | 0.60  | 0.86 | 0.59 | -0.02 | 0.63 | 23.24 |
| 5 | OAR5_25491559.1   | 22769321  | 0.72 | 0.51 | 0.39 | 0.02  | 0.51 | 0.65 | 0.51  | 0.47 | 22.56 |
| 5 | OAR5_33499998.1   | 30419920  | 0.69 | 0.54 | 0.35 | 0.55  | 0.76 | 0.62 | 0.73  | 0.13 | 26.70 |
| 5 | s39187.1          | 46272815  | 0.70 | 0.57 | 0.53 | 0.70  | 0.61 | 0.24 | 0.41  | 0.36 | 24.75 |
| 5 | OAR5_55949772.1   | 51535099  | 0.65 | 0.67 | 0.12 | 0.69  | 0.46 | 0.49 | 0.40  | 0.73 | 25.12 |
| 5 | OAR5_56001782.1   | 51587928  | 0.76 | 0.68 | 0.74 | 0.77  | 0.65 | 0.57 | 0.43  | 0.66 | 33.53 |
| 5 | OAR5_94259136.1   | 86043483  | 0.54 | 0.42 | 0.38 | 0.39  | 0.70 | 0.71 | 0.65  | 0.71 | 27.72 |
| 6 | OAR6_22138611.1   | 19161699  | 0.59 | 0.70 | 0.80 | 0.70  | 0.62 | 0.56 | 0.23  | 0.32 | 28.27 |
| 6 | OAR6_64407192.1   | 58445946  | 0.64 | 0.55 | 0.43 | 0.12  | 0.65 | 0.61 | 0.58  | 0.49 | 24.54 |
| 6 | OAR6_67376317.1   | 61138606  | 0.76 | 0.62 | 0.60 | 0.56  | 0.86 | 0.45 | 0.42  | 0.77 | 31.63 |
| 6 | OAR6_94477596.1   | 86145569  | 0.86 | 0.88 | 0.14 | 0.54  | 0.81 | 0.67 | 0.10  | 0.13 | 24.73 |
| 6 | s21552.1          | 94639943  | 0.75 | 0.81 | 0.93 | 0.30  | 0.93 | 0.96 | 0.51  | 0.78 | 39.21 |
| 7 | s24872.1          | 15988141  | 0.48 | 0.46 | 0.69 | 0.71  | 0.79 | 0.72 | 0.34  | 0.69 | 30.75 |
| 7 | s17550.1          | 42463209  | 0.69 | 0.86 | 0.68 | 0.80  | 0.64 | 0.87 | 0.46  | 0.86 | 38.07 |
| 7 | OAR7_47161420.1   | 42551974  | 0.63 | 0.90 | 0.73 | 0.84  | 0.65 | 0.93 | 0.67  | 0.79 | 40.15 |
| 7 | OAR7_50297566.1   | 45575342  | 0.63 | 0.63 | 0.48 | 0.50  | 0.63 | 0.27 | 0.34  | 0.62 | 24.58 |
| 7 | OAR7_52060307.1   | 47264055  | 0.80 | 0.70 | 0.34 | 0.13  | 0.60 | 0.70 | 0.37  | 0.49 | 25.04 |
| 7 | OAR7_63572452.1   | 57631745  | 0.42 | 0.36 | 0.40 | 0.20  | 0.36 | 0.90 | 0.93  | 0.25 | 23.23 |
| 7 | OAR7_63692612.1   | 57764872  | 0.56 | 0.58 | 0.64 | 0.38  | 0.47 | 0.69 | 0.48  | 0.60 | 27.37 |

|    |                   |          |      |      |      |      |      |      |      |      |       |
|----|-------------------|----------|------|------|------|------|------|------|------|------|-------|
| 7  | OAR7_63745942.1   | 57816492 | 0.88 | 0.86 | 0.95 | 0.75 | 0.95 | 0.92 | 0.95 | 0.95 | 48.12 |
| 7  | OAR7_63814443.1   | 57875478 | 0.95 | 0.95 | 0.95 | 0.72 | 0.95 | 0.92 | 0.91 | 0.91 | 48.65 |
| 7  | OAR7_63848145.1   | 57915106 | 0.92 | 0.92 | 0.91 | 0.91 | 0.92 | 0.91 | 0.92 | 0.92 | 48.98 |
| 7  | OAR7_87079540.1   | 79831939 | 0.65 | 0.63 | 0.56 | 0.50 | 0.50 | 0.55 | 0.51 | 0.69 | 28.54 |
| 8  | DU317902_536.1    | 10705915 | 0.74 | 0.64 | 0.61 | 0.29 | 0.38 | 0.44 | 0.49 | 0.48 | 24.81 |
| 8  | OAR8_22748311.1   | 20115452 | 0.62 | 0.63 | 0.41 | 0.54 | 0.75 | 0.25 | 0.27 | 0.71 | 24.92 |
| 8  | OAR8_33527267.1   | 30812613 | 0.56 | 0.65 | 0.19 | 0.52 | 0.51 | 0.35 | 0.70 | 0.65 | 24.57 |
| 8  | OAR8_40984723.1   | 38046068 | 0.75 | 0.75 | 0.65 | 0.70 | 0.75 | 0.59 | 0.31 | 0.74 | 33.17 |
| 8  | OAR8_41046815.1   | 38108511 | 0.79 | 0.79 | 0.70 | 0.75 | 0.80 | 0.65 | 0.35 | 0.71 | 35.43 |
| 8  | OAR8_41067189.1   | 38129829 | 0.78 | 0.78 | 0.62 | 0.73 | 0.78 | 0.63 | 0.23 | 0.59 | 32.50 |
| 8  | OAR8_46967818.1   | 43634777 | 0.62 | 0.62 | 0.47 | 0.21 | 0.22 | 0.71 | 0.47 | 0.74 | 24.82 |
| 8  | OAR8_55339073.1   | 51474008 | 0.55 | 0.60 | 0.27 | 0.46 | 0.74 | 0.67 | 0.68 | 0.54 | 27.58 |
| 8  | OAR8_57382929.1   | 53493005 | 0.69 | 0.60 | 0.41 | 0.42 | 0.40 | 0.58 | 0.72 | 0.59 | 27.17 |
| 8  | s37234.1          | 55901517 | 0.63 | 0.58 | 0.58 | 0.17 | 0.69 | 0.17 | 0.55 | 0.48 | 22.80 |
| 8  | OAR8_67469564.1   | 62674808 | 0.48 | 0.56 | 0.61 | 0.64 | 0.70 | 0.42 | 0.72 | 0.63 | 29.48 |
| 9  | s08530.1          | 15705043 | 0.38 | 0.35 | 0.70 | 0.29 | 0.52 | 0.58 | 0.71 | 0.30 | 23.32 |
| 9  | s66058.1          | 32100676 | 0.61 | 0.50 | 0.44 | 0.48 | 0.84 | 0.58 | 0.67 | 0.41 | 28.01 |
| 9  | OAR9_64800745_X.1 | 61661127 | 0.29 | 0.54 | 0.57 | 0.63 | 0.72 | 0.71 | 0.84 | 0.53 | 30.22 |
| 9  | OAR9_81909760.1   | 77297358 | 0.39 | 0.72 | 0.36 | 0.74 | 0.51 | 0.31 | 0.72 | 0.78 | 27.53 |
| 9  | OAR9_82428531.1   | 77756891 | 0.48 | 0.78 | 0.32 | 0.29 | 0.36 | 0.35 | 0.73 | 0.82 | 24.84 |
| 10 | OAR10_29092520.1  | 29054709 | 0.63 | 0.54 | 0.45 | 0.25 | 0.56 | 0.77 | 0.75 | 0.50 | 27.49 |
| 10 | OAR10_29469450.1  | 29436435 | 0.90 | 0.90 | 0.90 | 0.72 | 0.89 | 0.87 | 0.86 | 0.88 | 45.99 |
| 10 | OAR10_29511510.1  | 29476678 | 0.93 | 0.93 | 0.93 | 0.93 | 0.94 | 0.93 | 0.93 | 0.91 | 49.84 |
| 10 | OAR10_29538398.1  | 29502667 | 0.82 | 0.88 | 0.15 | 0.82 | 0.52 | 0.71 | 0.84 | 0.88 | 35.62 |
| 10 | s18834.1          | 29806294 | 0.84 | 0.84 | 0.65 | 0.64 | 0.71 | 0.52 | 0.49 | 0.81 | 34.99 |
| 10 | s12004.1          | 30674002 | 0.46 | 0.37 | 0.40 | 0.71 | 0.74 | 0.33 | 0.73 | 0.45 | 25.29 |

|    |                    |          |      |      |      |      |      |      |      |      |       |
|----|--------------------|----------|------|------|------|------|------|------|------|------|-------|
| 10 | OAR10_30746533.1   | 30700853 | 0.57 | 0.73 | 0.68 | 0.49 | 0.71 | 0.16 | 0.73 | 0.35 | 27.22 |
| 10 | OAR10_40212146.1   | 39393584 | 0.62 | 0.28 | 0.52 | 0.27 | 0.53 | 0.42 | 0.49 | 0.71 | 22.89 |
| 10 | OAR10_49074172.1   | 48300368 | 0.65 | 0.69 | 0.56 | 0.26 | 0.67 | 0.60 | 0.83 | 0.23 | 27.98 |
| 10 | OAR10_54818443.1   | 53666062 | 0.74 | 0.74 | 0.70 | 0.45 | 0.65 | 0.69 | 0.46 | 0.58 | 31.99 |
| 10 | OAR10_57152217.1   | 56010798 | 0.66 | 0.58 | 0.49 | 0.63 | 0.55 | 0.17 | 0.45 | 0.57 | 24.57 |
| 10 | OAR10_61672235.1   | 60158728 | 0.35 | 0.35 | 0.55 | 0.53 | 0.84 | 0.81 | 0.45 | 0.33 | 25.79 |
| 10 | s71442.1           | 82994149 | 0.71 | 0.80 | 0.44 | 0.25 | 0.72 | 0.50 | 0.12 | 0.66 | 25.19 |
| 10 | s13236.1           | 84812819 | 0.46 | 0.50 | 0.48 | 0.47 | 0.50 | 0.46 | 0.46 | 0.46 | 22.58 |
| 10 | OAR10_93289640.1   | 85627106 | 0.39 | 0.74 | 0.50 | 0.65 | 0.16 | 0.53 | 0.22 | 0.59 | 22.65 |
| 11 | OAR11_11214325.1   | 11626457 | 0.87 | 0.87 | 0.55 | 0.33 | 0.71 | 0.80 | 0.67 | 0.22 | 31.92 |
| 11 | s17310.1           | 19385272 | 0.88 | 0.78 | 0.86 | 0.51 | 0.28 | 0.56 | 0.91 | 0.75 | 36.00 |
| 11 | OAR11_19800228_X.1 | 19397667 | 0.76 | 0.69 | 0.69 | 0.29 | 0.29 | 0.26 | 0.74 | 0.61 | 26.64 |
| 11 | s49226.1           | 22736347 | 0.48 | 0.51 | 0.52 | 0.55 | 0.58 | 0.50 | 0.51 | 0.47 | 24.80 |
| 11 | OAR11_23673049.1   | 22780752 | 0.70 | 0.70 | 0.56 | 0.56 | 0.71 | 0.43 | 0.67 | 0.61 | 30.93 |
| 11 | s41017.1           | 22814442 | 0.71 | 0.71 | 0.55 | 0.60 | 0.72 | 0.41 | 0.69 | 0.63 | 31.59 |
| 11 | OAR11_27654920.1   | 26421905 | 0.73 | 0.73 | 0.48 | 0.62 | 0.74 | 0.70 | 0.44 | 0.73 | 32.60 |
| 11 | s10224.1           | 43937146 | 0.62 | 0.67 | 0.57 | 0.55 | 0.66 | 0.44 | 0.45 | 0.36 | 26.42 |
| 11 | s50510.1           | 45436064 | 0.58 | 0.50 | 0.54 | 0.25 | 0.43 | 0.49 | 0.60 | 0.65 | 24.42 |
| 11 | OAR11_52263542.1   | 49193942 | 0.60 | 0.55 | 0.53 | 0.42 | 0.70 | 0.43 | 0.62 | 0.58 | 27.17 |
| 12 | OAR12_39493157.1   | 35320580 | 0.64 | 0.59 | 0.57 | 0.69 | 0.80 | 0.28 | 0.51 | 0.79 | 30.25 |
| 12 | OAR12_43257167.1   | 38843578 | 0.71 | 0.51 | 0.73 | 0.62 | 0.79 | 0.71 | 0.63 | 0.88 | 35.84 |
| 12 | OAR12_43331187.1   | 38923821 | 0.69 | 0.91 | 0.76 | 0.56 | 0.95 | 0.69 | 0.53 | 0.82 | 38.33 |
| 12 | OAR12_43408733.1   | 39002907 | 0.71 | 0.65 | 0.60 | 0.38 | 0.73 | 0.46 | 0.40 | 0.88 | 29.85 |
| 12 | OAR12_50496675.1   | 45600886 | 0.44 | 0.49 | 0.65 | 0.64 | 0.82 | 0.28 | 0.51 | 0.69 | 27.64 |
| 12 | OAR12_71435396.1   | 64847102 | 0.57 | 0.16 | 0.69 | 0.48 | 0.29 | 0.47 | 0.76 | 0.66 | 25.01 |
| 12 | OAR12_71458988.1   | 64870223 | 0.62 | 0.43 | 0.50 | 0.61 | 0.43 | 0.43 | 0.48 | 0.53 | 24.28 |

|    |                    |          |      |      |      |      |      |      |      |      |       |
|----|--------------------|----------|------|------|------|------|------|------|------|------|-------|
| 13 | OAR13_51387503.1   | 48147260 | 0.72 | 0.53 | 0.48 | 0.46 | 0.77 | 0.46 | 0.86 | 0.80 | 31.72 |
| 13 | OAR13_63161846.1   | 58023662 | 0.44 | 0.64 | 0.49 | 0.39 | 0.65 | 0.57 | 0.47 | 0.52 | 25.34 |
| 13 | OAR13_81527927.1   | 75702438 | 0.68 | 0.75 | 0.16 | 0.37 | 0.57 | 0.33 | 0.23 | 0.77 | 22.50 |
| 13 | s75919.1           | 78004271 | 0.60 | 0.66 | 0.51 | 0.44 | 0.69 | 0.41 | 0.66 | 0.46 | 27.18 |
| 13 | s46185.1           | 78420224 | 0.56 | 0.65 | 0.80 | 0.64 | 0.20 | 0.52 | 0.68 | 0.55 | 28.94 |
| 14 | s71975.1           | 16349731 | 0.58 | 0.71 | 0.46 | 0.41 | 0.36 | 0.71 | 0.33 | 0.58 | 25.21 |
| 14 | OAR14_21510686_X.1 | 20924529 | 0.58 | 0.72 | 0.09 | 0.58 | 0.58 | 0.68 | 0.16 | 0.47 | 22.65 |
| 14 | OAR14_37495397.1   | 36031629 | 0.66 | 0.57 | 0.42 | 0.47 | 0.64 | 0.63 | 0.41 | 0.48 | 25.96 |
| 14 | OAR14_39834952.1   | 38250883 | 0.26 | 0.53 | 0.74 | 0.37 | 0.38 | 0.29 | 0.53 | 0.75 | 22.98 |
| 14 | OAR14_52888836.1   | 49997609 | 0.67 | 0.64 | 0.44 | 0.20 | 0.68 | 0.50 | 0.42 | 0.41 | 23.80 |
| 15 | OAR15_13425521.1   | 13417873 | 0.82 | 0.90 | 0.50 | 0.29 | 0.88 | 0.76 | 0.82 | 0.45 | 34.56 |
| 15 | OAR15_32949553.1   | 31492057 | 0.25 | 0.53 | 0.48 | 0.54 | 0.70 | 0.59 | 0.44 | 0.83 | 26.54 |
| 15 | s72653.1           | 31723078 | 0.39 | 0.47 | 0.29 | 0.67 | 0.52 | 0.46 | 0.46 | 0.75 | 23.77 |
| 15 | OAR15_44332191.1   | 42207222 | 0.76 | 0.76 | 0.69 | 0.17 | 0.77 | 0.74 | 0.76 | 0.50 | 32.88 |
| 15 | OAR15_58554489.1   | 53412021 | 0.67 | 0.47 | 0.55 | 0.56 | 0.31 | 0.45 | 0.40 | 0.52 | 23.82 |
| 15 | OAR15_68933568.1   | 63386447 | 0.51 | 0.68 | 0.34 | 0.29 | 0.47 | 0.66 | 0.61 | 0.63 | 25.37 |
| 15 | s28875.1           | 72707350 | 0.65 | 0.89 | 0.52 | 0.29 | 0.81 | 0.77 | 0.71 | 0.57 | 33.05 |
| 15 | s52687.1           | 72747023 | 0.69 | 0.67 | 0.02 | 0.48 | 0.73 | 0.62 | 0.41 | 0.37 | 23.58 |
| 15 | OAR15_87767502.1   | 79011094 | 0.54 | 0.66 | 0.58 | 0.56 | 0.65 | 0.50 | 0.69 | 0.20 | 27.14 |
| 16 | OAR16_8234966.1    | 7731038  | 0.54 | 0.55 | 0.61 | 0.59 | 0.75 | 0.70 | 0.38 | 0.71 | 30.28 |
| 16 | OAR16_26522451.1   | 24393554 | 0.38 | 0.55 | 0.73 | 0.45 | 0.55 | 0.90 | 0.69 | 0.71 | 31.69 |
| 16 | OAR16_33317775.1   | 30655866 | 0.34 | 0.71 | 0.45 | 0.37 | 0.65 | 0.39 | 0.51 | 0.68 | 24.50 |
| 16 | OAR16_33435828.1   | 30720540 | 0.54 | 0.73 | 0.50 | 0.38 | 0.65 | 0.09 | 0.56 | 0.60 | 24.08 |
| 16 | OAR16_33478147.1   | 30847022 | 0.49 | 0.63 | 0.32 | 0.49 | 0.76 | 0.50 | 0.34 | 0.63 | 24.92 |
| 16 | s51002.1           | 70900966 | 0.70 | 0.75 | 0.36 | 0.75 | 0.82 | 0.21 | 0.49 | 0.40 | 27.03 |
| 16 | s37581.1           | 70922464 | 0.70 | 0.75 | 0.36 | 0.64 | 0.82 | 0.21 | 0.49 | 0.40 | 26.23 |

|    |                    |          |      |      |      |      |      |      |      |      |       |
|----|--------------------|----------|------|------|------|------|------|------|------|------|-------|
| 17 | OAR17_1759664.1    | 1440961  | 0.44 | 0.58 | 0.53 | 0.55 | 0.59 | 0.16 | 0.55 | 0.61 | 23.81 |
| 17 | OAR17_1818548.1    | 1509630  | 0.90 | 0.88 | 0.71 | 0.62 | 0.83 | 0.59 | 0.67 | 0.73 | 38.34 |
| 17 | s36178.1           | 12319170 | 0.42 | 0.84 | 0.44 | 0.53 | 0.75 | 0.25 | 0.44 | 0.59 | 25.49 |
| 17 | OAR17_13903096.1   | 12471246 | 0.42 | 0.69 | 0.55 | 0.33 | 0.65 | 0.49 | 0.28 | 0.80 | 25.65 |
| 17 | OAR17_28390642.1   | 25862600 | 0.43 | 0.46 | 0.64 | 0.15 | 0.63 | 0.38 | 0.54 | 0.53 | 22.48 |
| 17 | s09129.1           | 53470559 | 0.67 | 0.56 | 0.33 | 0.39 | 0.83 | 0.80 | 0.63 | 0.76 | 31.04 |
| 17 | s49475.1           | 53499969 | 0.71 | 0.65 | 0.36 | 0.42 | 0.85 | 0.82 | 0.65 | 0.78 | 33.00 |
| 17 | OAR17_58220718.1   | 53511490 | 0.71 | 0.65 | 0.33 | 0.42 | 0.85 | 0.36 | 0.58 | 0.78 | 28.51 |
| 17 | s05080.1           | 54645722 | 0.42 | 0.56 | 0.55 | 0.32 | 0.58 | 0.52 | 0.30 | 0.71 | 23.76 |
| 18 | s31152.1           | 19342316 | 0.61 | 0.55 | 0.50 | 0.17 | 0.97 | 0.58 | 0.71 | 0.52 | 28.51 |
| 18 | s62564.1           | 19399095 | 0.57 | 0.78 | 0.32 | 0.12 | 0.79 | 0.60 | 0.54 | 0.38 | 24.62 |
| 18 | s12590.1           | 20040105 | 0.84 | 0.65 | 0.59 | 0.49 | 0.82 | 0.62 | 0.75 | 0.52 | 33.64 |
| 18 | OAR18_47726031.1   | 44805751 | 0.32 | 0.58 | 0.78 | 0.50 | 0.77 | 0.28 | 0.27 | 0.68 | 25.40 |
| 18 | OAR18_47790447_X.1 | 44858471 | 0.32 | 0.58 | 0.78 | 0.50 | 0.77 | 0.42 | 0.27 | 0.68 | 26.50 |
| 18 | s29776.1           | 68278290 | 0.50 | 0.61 | 0.75 | 0.74 | 0.86 | 0.45 | 0.57 | 0.83 | 33.78 |
| 19 | OAR19_17468739_X.1 | 16713971 | 0.55 | 0.40 | 0.40 | 0.66 | 0.36 | 0.61 | 0.63 | 0.62 | 25.79 |
| 19 | OAR19_32257190.1   | 30608973 | 0.51 | 0.18 | 0.60 | 0.44 | 0.54 | 0.40 | 0.68 | 0.80 | 25.13 |
| 19 | OAR19_33593848.1   | 31915771 | 0.63 | 0.27 | 0.75 | 0.33 | 0.14 | 0.48 | 0.78 | 0.67 | 24.90 |
| 19 | s04445.1           | 53852012 | 0.49 | 0.64 | 0.40 | 0.32 | 0.79 | 0.26 | 0.66 | 0.71 | 25.68 |
| 19 | s21513.1           | 55690132 | 0.76 | 0.65 | 0.38 | 0.59 | 0.81 | 0.77 | 0.76 | 0.42 | 32.46 |
| 20 | s02472.1           | 15603841 | 0.62 | 0.71 | 0.72 | 0.29 | 0.65 | 0.54 | 0.35 | 0.40 | 26.36 |
| 20 | OAR20_37437726.1   | 34168829 | 0.74 | 0.86 | 0.73 | 0.75 | 0.62 | 0.43 | 0.69 | 0.45 | 33.58 |
| 20 | s39515.1           | 34256995 | 0.54 | 0.64 | 0.70 | 0.64 | 0.42 | 0.32 | 0.62 | 0.22 | 25.06 |
| 21 | s37379.1           | 30761604 | 0.44 | 0.65 | 0.52 | 0.42 | 0.49 | 0.32 | 0.71 | 0.66 | 25.54 |
| 21 | OAR21_50378541.1   | 45368906 | 0.62 | 0.74 | 0.35 | 0.58 | 0.75 | 0.25 | 0.51 | 0.64 | 26.77 |
| 22 | OAR22_20201826.1   | 16421983 | 0.69 | 0.77 | 0.38 | 0.61 | 0.80 | 0.35 | 0.07 | 0.49 | 24.72 |

|    |                  |          |      |      |      |      |       |      |      |      |       |
|----|------------------|----------|------|------|------|------|-------|------|------|------|-------|
| 22 | OAR22_48326768.1 | 42969386 | 0.48 | 0.57 | 0.45 | 0.47 | 0.58  | 0.57 | 0.45 | 0.59 | 25.17 |
| 22 | s34755.1         | 43123707 | 0.51 | 0.69 | 0.68 | 0.80 | 0.45  | 0.49 | 0.47 | 0.50 | 28.64 |
| 22 | s47761.1         | 49298680 | 0.55 | 0.52 | 0.48 | 0.57 | -0.01 | 0.66 | 0.49 | 0.57 | 23.20 |
| 23 | OAR23_27062541.1 | 25919106 | 0.72 | 0.70 | 0.41 | 0.27 | 0.71  | 0.70 | 0.72 | 0.15 | 27.00 |
| 23 | OAR23_27112379.1 | 25972928 | 0.86 | 0.93 | 0.82 | 0.57 | 0.90  | 0.90 | 0.80 | 0.95 | 44.46 |
| 23 | OAR23_34033124.1 | 32354664 | 0.39 | 0.55 | 0.49 | 0.55 | 0.62  | 0.43 | 0.50 | 0.40 | 23.55 |
| 23 | OAR23_44089565.1 | 41621459 | 0.60 | 0.54 | 0.73 | 0.54 | 0.71  | 0.40 | 0.19 | 0.62 | 26.42 |
| 23 | OAR23_61577887.1 | 57787391 | 0.65 | 0.67 | 0.60 | 0.62 | 0.06  | 0.35 | 0.67 | 0.45 | 24.88 |
| 23 | OAR23_63417651.1 | 59418377 | 0.70 | 0.78 | 0.60 | 0.34 | 0.78  | 0.39 | 0.73 | 0.75 | 31.74 |
| 24 | s59452.1         | 9721533  | 0.73 | 0.86 | 0.44 | 0.72 | 0.52  | 0.28 | 0.27 | 0.73 | 27.83 |
| 24 | s00643.1         | 24846522 | 0.81 | 0.87 | 0.24 | 0.63 | 0.56  | 0.13 | 0.20 | 0.76 | 24.72 |
| 24 | OAR24_42942982.1 | 39726323 | 0.57 | 0.57 | 0.28 | 0.82 | 0.26  | 0.45 | 0.71 | 0.74 | 26.84 |
| 25 | s42703.1         | 17652415 | 0.78 | 0.90 | 0.66 | 0.72 | 0.75  | 0.56 | 0.32 | 0.84 | 35.20 |
| 25 | OAR25_20106030.1 | 19438048 | 0.70 | 0.59 | 0.56 | 0.29 | 0.81  | 0.49 | 0.29 | 0.69 | 26.95 |
| 25 | s72346.1         | 42689823 | 0.80 | 0.54 | 0.47 | 0.23 | 0.50  | 0.45 | 0.63 | 0.23 | 23.05 |

Notes: Significant SNPs located within merged genomic regions are colored "red".

**Table S4. Significant SNPs identified in Changthangi sheep**

| CHR | SNP                     | Position         | Fst between Changthangi and |             |             |             |              |             |             |             | Di           |
|-----|-------------------------|------------------|-----------------------------|-------------|-------------|-------------|--------------|-------------|-------------|-------------|--------------|
|     |                         |                  | BanglBGE                    | BanglGarole | Deccani     | Garut       | IndianGarole | Kage        | Lampuchhre  | Sumatra     |              |
| 1   | s41913.1                | 2870378          | 0.55                        | 0.44        | 0.54        | 0.59        | 0.62         | 0.49        | 0.14        | 0.60        | 25.31        |
| 1   | OAR1_20035449.1         | 19970769         | 0.64                        | 0.52        | 0.42        | 0.66        | 0.48         | 0.63        | 0.48        | 0.39        | 27.29        |
| 1   | OAR1_72984979.1         | 68457284         | 0.56                        | 0.60        | 0.49        | 0.44        | 0.57         | 0.05        | 0.56        | 0.48        | 23.07        |
| 1   | OAR1_81010882.1         | 75815312         | 0.77                        | 0.55        | 0.24        | 0.58        | 0.41         | 0.28        | 0.28        | 0.54        | 22.27        |
| 1   | <b>OAR1_107239370.1</b> | <b>99931717</b>  | <b>0.50</b>                 | <b>0.65</b> | <b>0.45</b> | <b>0.40</b> | <b>0.63</b>  | <b>0.37</b> | <b>0.65</b> | <b>0.58</b> | <b>27.08</b> |
| 1   | <b>OAR1_107504871.1</b> | <b>100185774</b> | <b>0.64</b>                 | <b>0.64</b> | <b>0.62</b> | <b>0.61</b> | <b>0.65</b>  | <b>0.60</b> | <b>0.64</b> | <b>0.46</b> | <b>32.27</b> |
| 1   | OAR1_145497863.1        | 134502219        | 0.56                        | 0.34        | 0.21        | 0.65        | 0.58         | 0.65        | 0.33        | 0.25        | 22.08        |
| 1   | OAR1_156411137.1        | 144907948        | 0.59                        | 0.55        | 0.52        | 0.43        | 0.59         | 0.19        | 0.38        | 0.68        | 24.66        |
| 1   | s13827.1                | 172607565        | 0.58                        | 0.47        | 0.50        | 0.13        | 0.70         | -0.02       | 0.37        | 0.77        | 21.13        |
| 1   | OAR1_199252158.1        | 184627258        | 0.53                        | 0.59        | 0.42        | 0.30        | 0.70         | 0.68        | 0.44        | 0.71        | 28.24        |
| 1   | OAR1_205303256.1        | 190370051        | 0.43                        | 0.61        | 0.63        | 0.13        | 0.51         | 0.48        | 0.66        | 0.44        | 24.86        |
| 1   | OAR1_223784851.1        | 207248370        | 0.60                        | 0.72        | 0.49        | 0.48        | 0.73         | 0.24        | 0.09        | 0.62        | 24.82        |
| 1   | s32029.1                | 210073609        | 0.69                        | 0.79        | 0.22        | 0.52        | 0.75         | 0.65        | 0.09        | 0.19        | 24.49        |
| 1   | OAR1_237504699.1        | 220288059        | 0.50                        | 0.64        | 0.26        | 0.57        | 0.55         | 0.54        | 0.58        | 0.45        | 25.88        |
| 1   | <b>s68196.1</b>         | <b>247826668</b> | <b>0.51</b>                 | <b>0.70</b> | <b>0.09</b> | <b>0.21</b> | <b>0.80</b>  | <b>0.46</b> | <b>0.58</b> | <b>0.39</b> | <b>22.69</b> |
| 1   | <b>OAR1_268122939.1</b> | <b>248275678</b> | <b>0.94</b>                 | <b>0.82</b> | <b>0.69</b> | <b>0.35</b> | <b>0.65</b>  | <b>0.36</b> | <b>0.60</b> | <b>0.57</b> | <b>32.97</b> |
| 1   | OAR1_273868392.1        | 253325565        | 0.58                        | 0.51        | 0.48        | 0.54        | 0.31         | 0.52        | 0.37        | 0.11        | 21.29        |
| 2   | OAR2_7954574.1          | 8942592          | 0.52                        | 0.65        | 0.37        | -0.01       | 0.66         | 0.48        | 0.42        | 0.64        | 23.02        |
| 2   | OAR2_16538077.1         | 16975392         | 0.14                        | 0.66        | 0.62        | 0.37        | 0.29         | 0.28        | 0.54        | 0.63        | 21.90        |
| 2   | <b>OAR2_31888274.1</b>  | <b>30919873</b>  | <b>0.71</b>                 | <b>0.77</b> | <b>0.54</b> | <b>0.16</b> | <b>0.32</b>  | <b>0.68</b> | <b>0.49</b> | <b>0.63</b> | <b>28.04</b> |
| 2   | <b>OAR2_32180338.1</b>  | <b>31018254</b>  | <b>0.41</b>                 | <b>0.57</b> | <b>0.51</b> | <b>0.23</b> | <b>0.28</b>  | <b>0.50</b> | <b>0.52</b> | <b>0.72</b> | <b>23.58</b> |
| 2   | OAR2_39605749.1         | 38050036         | 0.46                        | 0.55        | 0.38        | 0.36        | 0.47         | 0.41        | 0.62        | 0.32        | 22.14        |
| 2   | OAR2_60859576.1         | 56556228         | 0.61                        | 0.79        | 0.54        | 0.30        | 0.54         | 0.21        | 0.17        | 0.57        | 23.20        |

|   |                  |           |      |      |      |      |      |      |      |      |       |
|---|------------------|-----------|------|------|------|------|------|------|------|------|-------|
| 2 | OAR2_64231337.1  | 59762935  | 0.32 | 0.25 | 0.15 | 0.60 | 0.46 | 0.30 | 0.82 | 0.65 | 21.46 |
| 2 | OAR2_86948508.1  | 81785728  | 0.69 | 0.82 | 0.58 | 0.67 | 0.42 | 0.42 | 0.29 | 0.68 | 29.85 |
| 2 | OAR2_87089443.1  | 81887124  | 0.32 | 0.74 | 0.38 | 0.51 | 0.49 | 0.39 | 0.62 | 0.62 | 25.73 |
| 2 | OAR2_87543957.1  | 82346323  | 0.44 | 0.34 | 0.55 | 0.46 | 0.46 | 0.09 | 0.58 | 0.61 | 21.76 |
| 2 | OAR2_88927720.1  | 83644533  | 0.40 | 0.66 | 0.57 | 0.68 | 0.51 | 0.73 | 0.55 | 0.39 | 29.50 |
| 2 | OAR2_107945014.1 | 100364649 | 0.71 | 0.74 | 0.33 | 0.64 | 0.51 | 0.41 | 0.22 | 0.76 | 27.50 |
| 2 | s33638.1         | 129791658 | 0.62 | 0.62 | 0.23 | 0.39 | 0.56 | 0.17 | 0.54 | 0.61 | 22.82 |
| 2 | OAR2_143916009.1 | 135304995 | 0.39 | 0.50 | 0.47 | 0.51 | 0.55 | 0.40 | 0.29 | 0.53 | 22.48 |
| 2 | OAR2_171359957.1 | 161748310 | 0.61 | 0.72 | 0.18 | 0.39 | 0.81 | 0.67 | 0.50 | 0.51 | 27.99 |
| 2 | OAR2_174148415.1 | 164516447 | 0.58 | 0.63 | 0.35 | 0.46 | 0.70 | 0.35 | 0.43 | 0.31 | 23.68 |
| 2 | OAR2_174236715.1 | 164594319 | 0.60 | 0.56 | 0.34 | 0.57 | 0.50 | 0.55 | 0.45 | 0.44 | 25.41 |
| 2 | OAR2_219736519.1 | 207512168 | 0.49 | 0.42 | 0.68 | 0.28 | 0.70 | 0.13 | 0.71 | 0.15 | 22.18 |
| 2 | s33598.1         | 217834549 | 0.75 | 0.75 | 0.33 | 0.40 | 0.66 | 0.63 | 0.39 | 0.19 | 26.12 |
| 2 | s37310.1         | 232414241 | 0.61 | 0.44 | 0.47 | 0.10 | 0.62 | 0.57 | 0.54 | 0.24 | 22.64 |
| 2 | s13779.1         | 232485668 | 0.85 | 0.56 | 0.71 | 0.39 | 0.88 | 0.85 | 0.16 | 0.63 | 33.66 |
| 2 | s09024.1         | 234609188 | 0.50 | 0.39 | 0.36 | 0.44 | 0.67 | 0.11 | 0.66 | 0.45 | 21.77 |
| 2 | s41966.1         | 237813990 | 0.42 | 0.74 | 0.72 | 0.05 | 0.65 | 0.56 | 0.58 | 0.69 | 28.75 |
| 2 | OAR2_251166495.1 | 237822440 | 0.42 | 0.74 | 0.72 | 0.05 | 0.65 | 0.56 | 0.58 | 0.69 | 28.75 |
| 2 | OAR2_259153647.1 | 245206162 | 0.74 | 0.66 | 0.32 | 0.74 | 0.73 | 0.41 | 0.43 | 0.11 | 26.25 |
| 3 | OAR3_42867624.1  | 40124759  | 0.73 | 0.57 | 0.30 | 0.25 | 0.70 | 0.51 | 0.41 | 0.03 | 21.54 |
| 3 | OAR3_44467884.1  | 41551185  | 0.58 | 0.32 | 0.20 | 0.55 | 0.24 | 0.53 | 0.51 | 0.61 | 21.71 |
| 3 | s25321.1         | 62015360  | 0.68 | 0.68 | 0.62 | 0.61 | 0.69 | 0.64 | 0.65 | 0.64 | 34.87 |
| 3 | s68356.1         | 62044832  | 0.64 | 0.64 | 0.53 | 0.49 | 0.61 | 0.60 | 0.60 | 0.59 | 30.83 |
| 3 | OAR3_66317995.1  | 62704565  | 0.78 | 0.40 | 0.25 | 0.58 | 0.42 | 0.35 | 0.49 | 0.45 | 23.09 |
| 3 | OAR3_67654203.1  | 64054051  | 0.44 | 0.77 | 0.35 | 0.64 | 0.25 | 0.39 | 0.10 | 0.58 | 21.56 |
| 3 | OAR3_77361732.1  | 73231766  | 0.76 | 0.31 | 0.27 | 0.55 | 0.20 | 0.18 | 0.64 | 0.68 | 21.95 |



|   |                    |           |      |      |      |      |      |      |      |      |       |
|---|--------------------|-----------|------|------|------|------|------|------|------|------|-------|
| 3 | s09462.1           | 104064729 | 0.49 | 0.41 | 0.09 | 0.24 | 0.64 | 0.47 | 0.68 | 0.52 | 21.26 |
| 3 | OAR3_115417890_X.1 | 108409583 | 0.57 | 0.39 | 0.55 | 0.54 | 0.58 | 0.19 | 0.30 | 0.53 | 22.63 |
| 3 | OAR3_115425020_X.1 | 108415853 | 0.55 | 0.37 | 0.53 | 0.52 | 0.56 | 0.21 | 0.27 | 0.50 | 21.58 |
| 3 | OAR3_115443384.1   | 108434471 | 0.55 | 0.58 | 0.78 | 0.48 | 0.85 | 0.30 | 0.40 | 0.76 | 30.82 |
| 3 | OAR3_135754645.1   | 127278076 | 0.53 | 0.38 | 0.46 | 0.41 | 0.54 | 0.49 | 0.53 | 0.11 | 21.45 |
| 3 | OAR3_141010154.1   | 131915865 | 0.50 | 0.64 | 0.72 | 0.49 | 0.87 | 0.23 | 0.34 | 0.55 | 27.90 |
| 3 | OAR3_150785833.1   | 140970538 | 0.69 | 0.38 | 0.66 | 0.68 | 0.36 | 0.41 | 0.77 | 0.82 | 31.58 |
| 3 | OAR3_163942175.1   | 153280516 | 0.53 | 0.65 | 0.38 | 0.54 | 0.33 | 0.49 | 0.58 | 0.57 | 25.95 |
| 3 | OAR3_165009241.1   | 154213690 | 0.16 | 0.13 | 0.88 | 0.79 | 0.06 | 0.43 | 0.94 | 0.69 | 26.88 |
| 3 | OAR3_166530239_X.1 | 155660948 | 0.50 | 0.36 | 0.67 | 0.52 | 0.67 | 0.11 | 0.11 | 0.72 | 22.70 |
| 3 | OAR3_171973029.1   | 160758526 | 0.76 | 0.64 | 0.20 | 0.30 | 0.63 | 0.57 | 0.08 | 0.57 | 23.05 |
| 3 | OAR3_174102523.1   | 162819252 | 0.55 | 0.55 | 0.53 | 0.48 | 0.56 | 0.51 | 0.55 | 0.55 | 27.83 |
| 3 | s35132.1           | 163307018 | 0.70 | 0.79 | 0.47 | 0.65 | 0.86 | 0.74 | 0.25 | 0.36 | 31.67 |
| 3 | s37564.1           | 165413630 | 0.69 | 0.45 | 0.49 | 0.70 | 0.25 | 0.45 | 0.07 | 0.46 | 22.29 |
| 3 | s52576.1           | 165785278 | 0.39 | 0.55 | 0.76 | 0.15 | 0.79 | 0.56 | 0.58 | 0.25 | 26.14 |
| 3 | s05280.1           | 178423049 | 0.67 | 0.44 | 0.38 | 0.18 | 0.07 | 0.65 | 0.64 | 0.35 | 21.25 |
| 3 | s27086.1           | 178502319 | 0.70 | 0.50 | 0.41 | 0.02 | 0.30 | 0.55 | 0.39 | 0.55 | 21.20 |
| 3 | OAR3_191756128.1   | 178517886 | 0.56 | 0.56 | 0.57 | 0.25 | 0.43 | 0.72 | 0.66 | 0.14 | 25.31 |
| 3 | s60816.1           | 178743725 | 0.72 | 0.74 | 0.41 | 0.74 | 0.46 | 0.15 | 0.50 | 0.76 | 28.71 |
| 3 | OAR3_194730311.1   | 180817708 | 0.41 | 0.47 | 0.42 | 0.66 | 0.26 | 0.02 | 0.66 | 0.62 | 21.55 |
| 3 | OAR3_194751219.1   | 180839858 | 0.55 | 0.63 | 0.53 | 0.39 | 0.38 | 0.15 | 0.66 | 0.68 | 25.14 |
| 3 | s70839.1           | 186368226 | 0.51 | 0.51 | 0.47 | 0.42 | 0.63 | 0.49 | 0.51 | 0.54 | 25.94 |
| 3 | OAR3_202159984.1   | 187895177 | 0.62 | 0.00 | 0.57 | 0.50 | 0.39 | 0.42 | 0.62 | 0.39 | 22.08 |
| 4 | s53485.1           | 9377742   | 0.34 | 0.43 | 0.56 | 0.40 | 0.40 | 0.17 | 0.77 | 0.48 | 22.15 |
| 4 | OAR26_43350073.1   | 12666865  | 0.60 | 0.52 | 0.53 | 0.36 | 0.61 | 0.51 | 0.60 | 0.55 | 27.59 |
| 4 | OAR4_14572146.1    | 14355529  | 0.73 | 0.66 | 0.50 | 0.57 | 0.59 | 0.47 | 0.77 | 0.82 | 33.88 |

|   |                  |          |      |      |      |      |      |      |      |      |       |
|---|------------------|----------|------|------|------|------|------|------|------|------|-------|
| 4 | OAR4_24779248.1  | 23648876 | 0.51 | 0.62 | 0.33 | 0.51 | 0.63 | 0.49 | 0.08 | 0.28 | 21.00 |
| 4 | OAR4_28903984.1  | 27527718 | 0.68 | 0.57 | 0.23 | 0.23 | 0.76 | 0.31 | 0.45 | 0.55 | 23.14 |
| 4 | s32219.1         | 48304254 | 0.44 | 0.25 | 0.38 | 0.85 | 0.22 | 0.46 | 0.82 | 0.91 | 27.93 |
| 4 | OAR4_51441757.1  | 48627750 | 0.47 | 0.47 | 0.39 | 0.30 | 0.48 | 0.42 | 0.47 | 0.46 | 21.14 |
| 4 | OAR4_51489408.1  | 48669962 | 0.69 | 0.59 | 0.67 | 0.59 | 0.73 | 0.69 | 0.72 | 0.72 | 36.44 |
| 4 | OAR4_71992063.1  | 68012278 | 0.55 | 0.64 | 0.00 | 0.36 | 0.60 | 0.45 | 0.40 | 0.57 | 21.31 |
| 4 | OAR4_80559387.1  | 75968047 | 0.40 | 0.61 | 0.44 | 0.58 | 0.78 | 0.41 | 0.79 | 0.87 | 31.74 |
| 4 | OAR4_80605717.1  | 76007878 | 0.38 | 0.59 | 0.32 | 0.20 | 0.70 | 0.57 | 0.71 | 0.44 | 24.41 |
| 4 | s11336.1         | 87572495 | 0.55 | 0.55 | 0.53 | 0.52 | 0.56 | 0.37 | 0.55 | 0.55 | 26.86 |
| 4 | OAR4_93067608.1  | 87649810 | 0.64 | 0.60 | 0.30 | 0.45 | 0.59 | 0.17 | 0.48 | 0.56 | 23.30 |
| 5 | OAR5_12579856.1  | 11026335 | 0.70 | 0.48 | 0.61 | 0.64 | 0.53 | 0.24 | 0.05 | 0.16 | 21.08 |
| 5 | s29567.1         | 16203101 | 0.50 | 0.80 | 0.82 | 0.30 | 0.78 | 0.31 | 0.75 | 0.14 | 28.83 |
| 5 | OAR5_29893442.1  | 26851727 | 0.64 | 0.69 | 0.26 | 0.49 | 0.63 | 0.39 | 0.30 | 0.10 | 21.24 |
| 5 | OAR5_42039615.1  | 38259222 | 0.61 | 0.51 | 0.22 | 0.65 | 0.31 | 0.47 | 0.18 | 0.57 | 21.60 |
| 5 | s46892.1         | 40487686 | 0.41 | 0.49 | 0.42 | 0.46 | 0.50 | 0.30 | 0.49 | 0.48 | 21.84 |
| 5 | s72060.1         | 40713566 | 0.61 | 0.79 | 0.70 | 0.09 | 0.65 | 0.35 | 0.39 | 0.66 | 27.30 |
| 5 | s23065.1         | 41357859 | 0.54 | 0.67 | 0.33 | 0.11 | 0.47 | 0.55 | 0.67 | 0.53 | 24.34 |
| 5 | OAR5_53338330.1  | 49080645 | 0.39 | 0.64 | 0.38 | 0.46 | 0.69 | 0.28 | 0.58 | 0.61 | 25.22 |
| 5 | OAR5_56001782.1  | 51587928 | 0.62 | 0.52 | 0.57 | 0.61 | 0.48 | 0.35 | 0.25 | 0.49 | 24.71 |
| 5 | OAR5_56257273.1  | 51843084 | 0.75 | 0.56 | 0.62 | 0.22 | 0.61 | 0.60 | 0.26 | 0.35 | 25.43 |
| 5 | OAR5_88516298.1  | 80558908 | 0.39 | 0.72 | 0.30 | 0.70 | 0.55 | 0.20 | 0.21 | 0.56 | 21.95 |
| 5 | OAR5_104570871.1 | 96006551 | 0.59 | 0.77 | 0.29 | 0.85 | 0.44 | 0.32 | 0.45 | 0.63 | 27.58 |
| 6 | OAR6_47518072.1  | 42568830 | 0.03 | 0.29 | 0.51 | 0.77 | 0.49 | 0.35 | 0.39 | 0.60 | 21.03 |
| 6 | s55289.1         | 46602091 | 0.69 | 0.61 | 0.48 | 0.31 | 0.61 | 0.27 | 0.31 | 0.37 | 22.53 |
| 6 | OAR6_56272175.1  | 51016603 | 0.36 | 0.55 | 0.35 | 0.44 | 0.89 | 0.43 | 0.23 | 0.30 | 21.72 |
| 6 | OAR6_59327164.1  | 53995243 | 0.54 | 0.44 | 0.63 | 0.25 | 0.59 | 0.09 | 0.56 | 0.48 | 22.12 |

|   |                  |           |      |      |      |       |      |      |       |      |       |
|---|------------------|-----------|------|------|------|-------|------|------|-------|------|-------|
| 6 | s21552.1         | 94639943  | 0.57 | 0.65 | 0.80 | 0.07  | 0.82 | 0.84 | 0.29  | 0.61 | 30.93 |
| 6 | OAR6_121352193.1 | 106834499 | 0.47 | 0.73 | 0.26 | 0.33  | 0.54 | 0.32 | 0.64  | 0.51 | 23.47 |
| 6 | s32537.1         | 115101978 | 0.47 | 0.64 | 0.26 | 0.41  | 0.64 | 0.53 | 0.65  | 0.63 | 26.84 |
| 7 | OAR7_4883405.1   | 5081808   | 0.58 | 0.58 | 0.51 | 0.42  | 0.59 | 0.54 | 0.54  | 0.57 | 27.90 |
| 7 | s24872.1         | 15988141  | 0.37 | 0.35 | 0.60 | 0.62  | 0.73 | 0.63 | 0.23  | 0.60 | 26.47 |
| 7 | s17550.1         | 42463209  | 0.36 | 0.61 | 0.34 | 0.50  | 0.31 | 0.60 | 0.12  | 0.61 | 21.25 |
| 7 | OAR7_47161420.1  | 42551974  | 0.31 | 0.68 | 0.42 | 0.58  | 0.34 | 0.71 | 0.36  | 0.52 | 25.13 |
| 7 | OAR7_52060307.1  | 47264055  | 0.81 | 0.70 | 0.36 | 0.17  | 0.60 | 0.71 | 0.38  | 0.50 | 27.20 |
| 7 | OAR7_63627909.1  | 57692469  | 0.64 | 0.55 | 0.71 | 0.40  | 0.52 | 0.81 | 0.69  | 0.76 | 34.34 |
| 7 | OAR7_63692612.1  | 57764872  | 0.69 | 0.71 | 0.78 | 0.52  | 0.60 | 0.83 | 0.61  | 0.73 | 37.23 |
| 7 | OAR7_63745942.1  | 57816492  | 0.79 | 0.77 | 0.88 | 0.61  | 0.90 | 0.84 | 0.89  | 0.89 | 45.69 |
| 7 | OAR7_63814443.1  | 57875478  | 0.94 | 0.94 | 0.93 | 0.65  | 0.94 | 0.90 | 0.89  | 0.88 | 49.40 |
| 7 | OAR7_63848145.1  | 57915106  | 0.91 | 0.91 | 0.91 | 0.90  | 0.92 | 0.90 | 0.91  | 0.91 | 51.10 |
| 7 | OAR7_83320136.1  | 76232943  | 0.42 | 0.63 | 0.43 | 0.25  | 0.71 | 0.35 | 0.48  | 0.56 | 23.70 |
| 7 | OAR7_87066180.1  | 79817839  | 0.47 | 0.67 | 0.35 | -0.02 | 0.69 | 0.70 | 0.19  | 0.46 | 21.51 |
| 7 | OAR7_87079540.1  | 79831939  | 0.56 | 0.53 | 0.44 | 0.38  | 0.40 | 0.42 | 0.40  | 0.59 | 23.43 |
| 7 | OAR7_89553402.1  | 82197428  | 0.42 | 0.34 | 0.57 | 0.28  | 0.68 | 0.45 | 0.44  | 0.79 | 25.16 |
| 7 | OAR7_97159644.1  | 89286934  | 0.53 | 0.57 | 0.39 | 0.20  | 0.39 | 0.38 | 0.43  | 0.63 | 21.75 |
| 7 | OAR7_97378846.1  | 89519883  | 0.55 | 0.55 | 0.58 | 0.17  | 0.66 | 0.21 | 0.68  | 0.06 | 21.34 |
| 7 | OAR7_101493967.1 | 93353104  | 0.55 | 0.91 | 0.38 | 0.21  | 0.51 | 0.42 | -0.01 | 0.54 | 21.57 |
| 8 | s72510.1         | 10725738  | 0.33 | 0.47 | 0.54 | 0.26  | 0.44 | 0.48 | 0.57  | 0.53 | 22.85 |
| 8 | OAR8_12125386.1  | 10820850  | 0.31 | 0.59 | 0.56 | 0.44  | 0.64 | 0.58 | 0.53  | 0.42 | 26.15 |
| 8 | s34333.1         | 47947284  | 0.71 | 0.36 | 0.14 | 0.28  | 0.75 | 0.51 | 0.53  | 0.65 | 24.38 |
| 8 | OAR8_55339073.1  | 51474008  | 0.42 | 0.49 | 0.13 | 0.32  | 0.67 | 0.57 | 0.59  | 0.41 | 21.99 |
| 8 | OAR8_67469564.1  | 62674808  | 0.31 | 0.41 | 0.47 | 0.50  | 0.59 | 0.24 | 0.61  | 0.50 | 22.46 |
| 9 | s35553.1         | 18169154  | 0.47 | 0.62 | 0.55 | 0.55  | 0.29 | 0.28 | 0.41  | 0.54 | 23.24 |

|    |                    |          |      |      |       |      |      |      |      |      |       |
|----|--------------------|----------|------|------|-------|------|------|------|------|------|-------|
| 9  | OAR9_45952110.1    | 43803853 | 0.03 | 0.50 | 0.70  | 0.42 | 0.60 | 0.53 | 0.75 | 0.57 | 26.56 |
| 9  | OAR9_59326545.1    | 56572469 | 0.45 | 0.45 | 0.60  | 0.03 | 0.67 | 0.65 | 0.26 | 0.29 | 21.17 |
| 9  | OAR9_64769748.1    | 61628833 | 0.69 | 0.24 | 0.66  | 0.52 | 0.42 | 0.56 | 0.78 | 0.28 | 27.38 |
| 9  | OAR9_64800745_X.1  | 61661127 | 0.11 | 0.36 | 0.37  | 0.44 | 0.57 | 0.52 | 0.72 | 0.34 | 21.01 |
| 9  | OAR9_66491264.1    | 63052885 | 0.31 | 0.46 | 0.41  | 0.51 | 0.60 | 0.45 | 0.16 | 0.65 | 21.83 |
| 9  | OAR9_79964970.1    | 75412590 | 0.62 | 0.62 | 0.44  | 0.59 | 0.63 | 0.53 | 0.16 | 0.34 | 24.80 |
| 9  | OAR9_81909760.1    | 77297358 | 0.46 | 0.79 | 0.44  | 0.82 | 0.58 | 0.40 | 0.79 | 0.86 | 33.76 |
| 9  | OAR9_82428531.1    | 77756891 | 0.59 | 0.87 | 0.46  | 0.44 | 0.48 | 0.50 | 0.83 | 0.91 | 33.58 |
| 10 | OAR10_29092520.1   | 29054709 | 0.60 | 0.50 | 0.41  | 0.21 | 0.53 | 0.76 | 0.74 | 0.46 | 27.29 |
| 10 | OAR10_29469450.1   | 29436435 | 0.66 | 0.66 | 0.64  | 0.36 | 0.63 | 0.58 | 0.59 | 0.62 | 31.34 |
| 10 | OAR10_29511510.1   | 29476678 | 0.68 | 0.68 | 0.66  | 0.65 | 0.69 | 0.64 | 0.68 | 0.64 | 35.75 |
| 10 | OAR10_29538398.1   | 29502667 | 0.57 | 0.67 | -0.02 | 0.56 | 0.19 | 0.38 | 0.60 | 0.66 | 21.85 |
| 10 | OAR10_53872811.1   | 52811394 | 0.55 | 0.24 | 0.54  | 0.73 | 0.65 | 0.28 | 0.29 | 0.25 | 21.87 |
| 10 | OAR10_57152217.1   | 56010798 | 0.82 | 0.74 | 0.65  | 0.80 | 0.70 | 0.34 | 0.61 | 0.73 | 36.04 |
| 11 | OAR11_19632538.1   | 19223203 | 0.72 | 0.60 | 0.46  | 0.52 | 0.73 | 0.45 | 0.53 | 0.56 | 29.65 |
| 11 | s17310.1           | 19385272 | 0.74 | 0.61 | 0.71  | 0.27 | 0.09 | 0.31 | 0.79 | 0.57 | 26.80 |
| 11 | OAR11_19800228_X.1 | 19397667 | 0.73 | 0.64 | 0.64  | 0.21 | 0.21 | 0.19 | 0.70 | 0.55 | 24.63 |
| 11 | OAR11_23673049.1   | 22780752 | 0.62 | 0.62 | 0.44  | 0.43 | 0.63 | 0.28 | 0.58 | 0.50 | 25.95 |
| 11 | s41017.1           | 22814442 | 0.62 | 0.62 | 0.40  | 0.47 | 0.63 | 0.25 | 0.58 | 0.50 | 25.60 |
| 11 | OAR11_43313971.1   | 40826416 | 0.57 | 0.43 | 0.39  | 0.45 | 0.07 | 0.47 | 0.60 | 0.56 | 22.17 |
| 11 | s46554.1           | 49142365 | 0.44 | 0.44 | 0.51  | 0.22 | 0.59 | 0.21 | 0.54 | 0.71 | 22.63 |
| 11 | OAR11_52263542.1   | 49193942 | 0.52 | 0.48 | 0.45  | 0.34 | 0.63 | 0.34 | 0.55 | 0.50 | 23.84 |
| 12 | OAR12_29127884.1   | 25645126 | 0.53 | 0.35 | 0.13  | 0.51 | 0.58 | 0.72 | 0.39 | 0.30 | 21.48 |
| 12 | OAR12_38753500.1   | 34604355 | 0.71 | 0.58 | 0.62  | 0.52 | 0.68 | 0.72 | 0.71 | 0.18 | 31.57 |
| 12 | OAR12_43257167.1   | 38843578 | 0.50 | 0.26 | 0.51  | 0.37 | 0.60 | 0.47 | 0.39 | 0.73 | 24.02 |
| 12 | OAR12_43331187.1   | 38923821 | 0.53 | 0.82 | 0.60  | 0.35 | 0.87 | 0.49 | 0.35 | 0.69 | 30.68 |

|    |                    |          |      |      |      |       |      |      |       |      |       |
|----|--------------------|----------|------|------|------|-------|------|------|-------|------|-------|
| 12 | OAR12_43408733.1   | 39002907 | 0.61 | 0.53 | 0.47 | 0.24  | 0.63 | 0.31 | 0.26  | 0.81 | 24.14 |
| 12 | OAR12_50496675.1   | 45600886 | 0.43 | 0.48 | 0.66 | 0.64  | 0.85 | 0.28 | 0.51  | 0.71 | 29.55 |
| 12 | s21761.1           | 47186720 | 0.26 | 0.71 | 0.26 | 0.19  | 0.69 | 0.26 | 0.71  | 0.61 | 22.44 |
| 13 | OAR13_14471555.1   | 14235819 | 0.80 | 0.51 | 0.28 | 0.44  | 0.81 | 0.52 | -0.02 | 0.11 | 21.02 |
| 13 | s14792.1           | 32586633 | 0.72 | 0.47 | 0.42 | 0.59  | 0.41 | 0.30 | 0.45  | 0.08 | 21.33 |
| 13 | s60097.1           | 52962246 | 0.51 | 0.94 | 0.28 | 0.54  | 0.64 | 0.28 | 0.32  | 0.45 | 24.52 |
| 13 | OAR13_67400889.1   | 62269037 | 0.64 | 0.44 | 0.65 | 0.40  | 0.47 | 0.16 | 0.21  | 0.43 | 20.98 |
| 13 | OAR13_81921734_X.1 | 76099369 | 0.55 | 0.55 | 0.53 | 0.52  | 0.56 | 0.21 | 0.55  | 0.55 | 25.48 |
| 13 | s75919.1           | 78004271 | 0.63 | 0.69 | 0.53 | 0.44  | 0.73 | 0.41 | 0.69  | 0.46 | 29.81 |
| 14 | OAR14_4087361.1    | 4147946  | 0.50 | 0.58 | 0.51 | 0.27  | 0.45 | 0.40 | 0.54  | 0.57 | 24.03 |
| 14 | OAR14_36559626.1   | 35119271 | 0.44 | 0.70 | 0.15 | 0.53  | 0.52 | 0.74 | 0.13  | 0.37 | 22.06 |
| 14 | OAR14_37495397.1   | 36031629 | 0.68 | 0.58 | 0.40 | 0.46  | 0.66 | 0.64 | 0.39  | 0.47 | 27.72 |
| 14 | OAR14_51700380_X.1 | 49082845 | 0.36 | 0.50 | 0.02 | 0.72  | 0.52 | 0.71 | 0.50  | 0.17 | 21.23 |
| 14 | OAR14_52888836.1   | 49997609 | 0.64 | 0.60 | 0.35 | 0.12  | 0.65 | 0.42 | 0.34  | 0.33 | 21.00 |
| 14 | s40432.1           | 56451397 | 0.51 | 0.42 | 0.36 | 0.70  | 0.82 | 0.25 | 0.47  | 0.63 | 26.11 |
| 15 | OAR15_44198795.1   | 42070930 | 0.47 | 0.53 | 0.19 | 0.39  | 0.62 | 0.42 | 0.44  | 0.66 | 22.69 |
| 15 | OAR15_44332191.1   | 42207222 | 0.59 | 0.59 | 0.49 | -0.01 | 0.60 | 0.55 | 0.59  | 0.25 | 23.01 |
| 15 | OAR15_68933568.1   | 63386447 | 0.41 | 0.61 | 0.23 | 0.18  | 0.37 | 0.57 | 0.53  | 0.54 | 20.99 |
| 15 | OAR15_87767502.1   | 79011094 | 0.41 | 0.56 | 0.45 | 0.43  | 0.55 | 0.36 | 0.59  | 0.08 | 21.18 |
| 16 | OAR16_33435828.1   | 30720540 | 0.52 | 0.73 | 0.48 | 0.37  | 0.63 | 0.10 | 0.54  | 0.58 | 24.72 |
| 16 | OAR16_37226202.1   | 34279856 | 0.69 | 0.74 | 0.66 | 0.44  | 0.68 | 0.35 | 0.62  | 0.68 | 32.04 |
| 16 | s44596.1           | 34315060 | 0.64 | 0.59 | 0.63 | -0.02 | 0.64 | 0.35 | 0.62  | 0.61 | 25.95 |
| 16 | s15191.1           | 39007570 | 0.66 | 0.53 | 0.67 | 0.48  | 0.67 | 0.57 | 0.66  | 0.56 | 31.87 |
| 16 | OAR16_48105833.1   | 44145304 | 0.56 | 0.46 | 0.16 | 0.49  | 0.48 | 0.26 | 0.56  | 0.63 | 21.85 |
| 16 | OAR16_69511009.1   | 63750355 | 0.60 | 0.83 | 0.66 | 0.54  | 0.92 | 0.66 | 0.58  | 0.29 | 33.82 |
| 17 | OAR17_3467332.1    | 3034628  | 0.36 | 0.31 | 0.74 | 0.49  | 0.30 | 0.25 | 0.43  | 0.60 | 21.82 |

|    |                   |          |      |      |      |      |      |      |      |      |       |
|----|-------------------|----------|------|------|------|------|------|------|------|------|-------|
| 17 | OAR17_11520692.1  | 10425201 | 0.45 | 0.60 | 0.41 | 0.29 | 0.57 | 0.56 | 0.49 | 0.48 | 24.25 |
| 17 | s36178.1          | 12319170 | 0.34 | 0.82 | 0.36 | 0.46 | 0.70 | 0.18 | 0.37 | 0.53 | 22.88 |
| 17 | OAR17_23888723.1  | 21434752 | 0.71 | 0.54 | 0.59 | 0.22 | 0.43 | 0.60 | 0.70 | 0.67 | 29.33 |
| 17 | OAR17_23905156.1  | 21454166 | 0.69 | 0.55 | 0.44 | 0.13 | 0.21 | 0.66 | 0.53 | 0.68 | 24.92 |
| 17 | s36776.1          | 54064665 | 0.66 | 0.29 | 0.53 | 0.43 | 0.54 | 0.51 | 0.10 | 0.73 | 23.98 |
| 18 | s31152.1          | 19342316 | 0.51 | 0.45 | 0.39 | 0.07 | 0.94 | 0.45 | 0.63 | 0.41 | 23.92 |
| 18 | s62564.1          | 19399095 | 0.55 | 0.80 | 0.29 | 0.10 | 0.81 | 0.59 | 0.53 | 0.35 | 25.35 |
| 18 | s12590.1          | 20040105 | 0.77 | 0.52 | 0.45 | 0.33 | 0.74 | 0.47 | 0.64 | 0.37 | 27.69 |
| 18 | OAR18_52089434.1  | 48867859 | 0.33 | 0.38 | 0.44 | 0.49 | 0.23 | 0.69 | 0.80 | 0.03 | 21.41 |
| 18 | OAR18_59577534.1  | 55762626 | 0.59 | 0.56 | 0.54 | 0.27 | 0.13 | 0.25 | 0.57 | 0.63 | 22.06 |
| 18 | s48176.1          | 67289143 | 0.73 | 0.78 | 0.74 | 0.12 | 0.62 | 0.53 | 0.73 | 0.45 | 31.17 |
| 18 | s29776.1          | 68278290 | 0.25 | 0.37 | 0.54 | 0.52 | 0.70 | 0.17 | 0.33 | 0.66 | 21.55 |
| 19 | OAR19_4318651.1   | 4077028  | 0.67 | 0.69 | 0.71 | 0.68 | 0.53 | 0.65 | 0.27 | 0.61 | 31.99 |
| 19 | s25034.1          | 48259482 | 0.28 | 0.33 | 0.39 | 0.47 | 0.33 | 0.48 | 0.74 | 0.43 | 21.36 |
| 19 | s04445.1          | 53852012 | 0.42 | 0.58 | 0.32 | 0.24 | 0.77 | 0.18 | 0.61 | 0.66 | 23.06 |
| 19 | s21513.1          | 55690132 | 0.59 | 0.44 | 0.16 | 0.37 | 0.66 | 0.58 | 0.59 | 0.19 | 21.88 |
| 19 | OAR19_61334312.1  | 57708741 | 0.60 | 0.60 | 0.57 | 0.48 | 0.61 | 0.42 | 0.60 | 0.17 | 26.04 |
| 20 | OAR20_9024546_X.1 | 8893097  | 0.55 | 0.55 | 0.25 | 0.39 | 0.45 | 0.51 | 0.47 | 0.43 | 22.26 |
| 20 | OAR20_37437726.1  | 34168829 | 0.69 | 0.84 | 0.68 | 0.70 | 0.56 | 0.35 | 0.64 | 0.37 | 32.03 |
| 20 | s39515.1          | 34256995 | 0.47 | 0.59 | 0.67 | 0.59 | 0.34 | 0.23 | 0.56 | 0.14 | 22.65 |
| 20 | OAR20_48476815.1  | 44558460 | 0.70 | 0.57 | 0.21 | 0.53 | 0.68 | 0.50 | 0.51 | 0.56 | 26.99 |
| 21 | OAR21_12460436.1  | 10911345 | 0.74 | 0.69 | 0.48 | 0.52 | 0.24 | 0.58 | 0.58 | 0.65 | 29.34 |
| 21 | s37379.1          | 30761604 | 0.39 | 0.61 | 0.48 | 0.37 | 0.45 | 0.28 | 0.69 | 0.63 | 24.47 |
| 21 | s63819.1          | 43818339 | 0.45 | 0.16 | 0.47 | 0.65 | 0.27 | 0.74 | 0.50 | 0.65 | 25.00 |
| 21 | s65606.1          | 46568117 | 0.26 | 0.39 | 0.55 | 0.54 | 0.39 | 0.54 | 0.60 | 0.65 | 25.03 |
| 22 | OAR22_33483867.1  | 29116134 | 0.57 | 0.50 | 0.58 | 0.53 | 0.52 | 0.47 | 0.34 | 0.63 | 26.64 |

|    |                  |          |      |      |      |      |      |      |      |      |       |
|----|------------------|----------|------|------|------|------|------|------|------|------|-------|
| 23 | s69818.1         | 3075709  | 0.64 | 0.61 | 0.26 | 0.40 | 0.63 | 0.43 | 0.58 | 0.60 | 26.23 |
| 23 | OAR23_27112379.1 | 25972928 | 0.64 | 0.76 | 0.57 | 0.24 | 0.71 | 0.69 | 0.55 | 0.78 | 32.81 |
| 23 | OAR23_34033124.1 | 32354664 | 0.36 | 0.56 | 0.49 | 0.55 | 0.63 | 0.41 | 0.49 | 0.39 | 24.43 |
| 23 | s31567.1         | 51126740 | 0.74 | 0.52 | 0.75 | 0.81 | 0.70 | 0.59 | 0.80 | 0.30 | 35.38 |
| 23 | OAR23_66632347.1 | 62242039 | 0.77 | 0.80 | 0.29 | 0.26 | 0.59 | 0.62 | 0.52 | 0.58 | 28.51 |
| 24 | s27883.1         | 9627147  | 0.55 | 0.63 | 0.44 | 0.61 | 0.43 | 0.14 | 0.40 | 0.44 | 22.57 |
| 24 | s45778.1         | 9658771  | 0.64 | 0.72 | 0.49 | 0.53 | 0.53 | 0.25 | 0.29 | 0.53 | 25.02 |
| 24 | s59452.1         | 9721533  | 0.77 | 0.91 | 0.48 | 0.77 | 0.55 | 0.34 | 0.32 | 0.77 | 31.96 |
| 24 | s69582.1         | 37753985 | 0.69 | 0.34 | 0.46 | 0.59 | 0.67 | 0.17 | 0.56 | 0.65 | 26.03 |
| 25 | s68395.1         | 31303297 | 0.47 | 0.63 | 0.47 | 0.18 | 0.49 | 0.49 | 0.31 | 0.57 | 22.45 |
| 26 | OAR26_17518698.1 | 14644438 | 0.74 | 0.31 | 0.26 | 0.46 | 0.68 | 0.62 | 0.47 | 0.24 | 23.70 |
| 26 | OAR26_20367221.1 | 17232588 | 0.45 | 0.45 | 0.43 | 0.42 | 0.46 | 0.41 | 0.45 | 0.44 | 21.61 |
| 26 | OAR26_34360075.1 | 30036364 | 0.51 | 0.66 | 0.33 | 0.49 | 0.58 | 0.48 | 0.39 | 0.36 | 23.70 |
| 26 | s22112.1         | 42948826 | 0.63 | 0.39 | 0.44 | 0.39 | 0.73 | 0.31 | 0.55 | 0.57 | 25.35 |

Notes: Significant SNPs located within merged genomic regions are colored "red".

**Table S5. Significant SNPs identified in Baruwal sheep**

| CHR | SNP              | Position  | Fst between Baruwal and |             |         |       |              |      |            |         | Di    |
|-----|------------------|-----------|-------------------------|-------------|---------|-------|--------------|------|------------|---------|-------|
|     |                  |           | BanglBGE                | BanglGarole | Deccani | Garut | IndianGarole | Kage | Lampuchhre | Sumatra |       |
| 1   | OAR1_9822302.1   | 10103593  | 0.70                    | 0.77        | 0.45    | 0.74  | 0.46         | 0.47 | 0.70       | 0.67    | 22.54 |
| 1   | OAR1_16786326.1  | 16801673  | 0.85                    | 0.77        | 0.56    | 0.73  | 0.74         | 0.57 | 0.44       | 0.54    | 23.92 |
| 1   | OAR1_34041305.1  | 33308065  | 0.69                    | 0.82        | 0.89    | 0.70  | 0.70         | 0.62 | 0.32       | 0.84    | 26.37 |
| 1   | OAR1_67773451.1  | 64101392  | 0.93                    | 0.96        | 0.69    | 0.52  | 0.94         | 0.72 | 0.63       | 0.77    | 29.66 |
| 1   | OAR1_69309059.1  | 65485724  | 0.52                    | 0.43        | 0.53    | 0.68  | 0.59         | 0.89 | 0.68       | 0.79    | 23.73 |
| 1   | OAR1_177013374.1 | 164069855 | 0.79                    | 0.81        | 0.74    | 0.55  | 0.92         | 0.87 | 0.69       | 0.73    | 29.43 |
| 1   | OAR1_181579456.1 | 168364994 | 0.74                    | 0.77        | 0.47    | 0.71  | 0.65         | 0.18 | 0.72       | 0.85    | 23.06 |
| 1   | OAR1_189179554.1 | 175482796 | 0.66                    | 0.68        | 0.75    | 0.93  | 0.63         | 0.78 | 0.93       | 0.27    | 26.80 |
| 1   | OAR1_191964562.1 | 178097316 | 0.29                    | 0.87        | 0.70    | 0.74  | 0.45         | 0.81 | 0.41       | 0.86    | 23.63 |
| 1   | s15220.1         | 182827903 | 0.69                    | 0.67        | 0.85    | 0.61  | 0.66         | 0.52 | 0.72       | 0.44    | 24.03 |
| 1   | OAR1_207317735.1 | 192074278 | 0.77                    | 0.77        | 0.72    | 0.83  | 0.15         | 0.25 | 0.77       | 0.71    | 22.67 |
| 1   | OAR1_217420572.1 | 201471554 | 0.77                    | 0.61        | 0.75    | 0.30  | 0.73         | 0.48 | 0.50       | 0.79    | 22.55 |
| 1   | OAR1_219772503.1 | 203499939 | 0.77                    | 0.79        | 0.47    | 0.53  | 0.92         | 0.84 | 0.74       | 0.79    | 27.78 |
| 1   | OAR1_261453067.1 | 241803266 | 0.92                    | 0.79        | 0.64    | 0.78  | 0.96         | 0.68 | 0.51       | 0.76    | 28.84 |
| 1   | s18320.1         | 243069237 | 0.94                    | 0.98        | 0.73    | 0.93  | 0.98         | 0.00 | 0.54       | 0.83    | 27.80 |
| 1   | OAR1_269956045.1 | 249966956 | 0.82                    | 0.68        | 0.85    | 0.45  | 0.68         | 0.84 | 0.84       | 0.74    | 28.44 |
| 1   | OAR1_270547664.1 | 250456371 | 0.54                    | 0.64        | 0.67    | 0.43  | 0.81         | 0.54 | 0.82       | 0.79    | 24.19 |
| 1   | OAR1_275446990.1 | 254866909 | 0.55                    | 0.74        | 0.76    | 0.46  | 0.62         | 0.71 | 0.89       | 0.60    | 25.09 |
| 2   | s63023.1         | 2991783   | 0.67                    | 0.43        | 0.57    | 0.85  | 0.78         | 0.52 | 0.50       | 0.66    | 22.61 |
| 2   | s58940.1         | 9701540   | 0.38                    | 0.66        | 0.77    | 0.73  | 0.40         | 0.78 | 0.88       | 0.90    | 26.05 |
| 2   | OAR2_52155350.1  | 48731082  | 0.69                    | 0.89        | 0.40    | 0.76  | 0.66         | 0.56 | 0.69       | 0.68    | 24.70 |
| 2   | OAR2_52187355.1  | 48762835  | 0.69                    | 0.82        | 0.59    | 0.55  | 0.70         | 0.56 | 0.43       | 0.76    | 23.46 |
| 2   | s31618.1         | 52177597  | 0.79                    | 0.92        | 0.38    | 0.98  | 0.74         | 0.68 | 0.47       | 0.80    | 27.01 |



|   |                    |           |      |      |      |      |      |      |      |      |       |
|---|--------------------|-----------|------|------|------|------|------|------|------|------|-------|
| 2 | OAR2_55818455.1    | 52218919  | 0.67 | 0.82 | 0.31 | 0.88 | 0.71 | 0.55 | 0.33 | 0.79 | 22.89 |
| 2 | OAR2_105762019.1   | 98330510  | 0.80 | 0.83 | 0.60 | 0.81 | 0.60 | 0.34 | 0.72 | 0.74 | 25.33 |
| 2 | OAR2_107787796.1   | 100199475 | 0.80 | 0.82 | 0.75 | 0.74 | 0.65 | 0.47 | 0.41 | 0.96 | 26.28 |
| 2 | OAR2_107945014.1   | 100364649 | 0.82 | 0.84 | 0.48 | 0.77 | 0.63 | 0.57 | 0.36 | 0.86 | 24.65 |
| 2 | OAR2_132501035.1   | 124290905 | 0.87 | 0.85 | 0.83 | 0.86 | 0.85 | 0.41 | 0.69 | 0.55 | 28.16 |
| 2 | s35762.1           | 139846639 | 0.52 | 0.62 | 0.71 | 0.61 | 0.73 | 0.28 | 0.82 | 0.73 | 22.83 |
| 2 | s31000.1           | 140158515 | 0.68 | 0.94 | 0.44 | 0.30 | 0.84 | 0.44 | 0.77 | 0.54 | 22.38 |
| 2 | OAR2_149959350.1   | 141063223 | 0.80 | 0.75 | 0.75 | 0.51 | 0.85 | 0.59 | 0.61 | 0.67 | 26.05 |
| 2 | s07522.1           | 145693768 | 0.50 | 0.72 | 0.66 | 0.46 | 0.79 | 0.75 | 0.75 | 0.72 | 24.96 |
| 2 | OAR2_154742668_X.1 | 145745763 | 0.64 | 0.79 | 0.64 | 0.78 | 0.70 | 0.70 | 0.38 | 0.96 | 26.25 |
| 2 | OAR2_155715202.1   | 146734798 | 0.49 | 0.68 | 0.69 | 0.55 | 0.76 | 0.71 | 0.92 | 0.98 | 27.33 |
| 2 | OAR2_155734672.1   | 146754173 | 0.51 | 0.60 | 0.74 | 0.55 | 0.42 | 0.71 | 0.94 | 0.98 | 25.57 |
| 2 | s05571.1           | 182923305 | 0.50 | 0.71 | 0.65 | 0.75 | 0.39 | 0.70 | 0.45 | 0.76 | 22.39 |
| 2 | OAR2_199892219.1   | 188490584 | 0.70 | 0.77 | 0.58 | 0.74 | 0.66 | 0.32 | 0.67 | 0.67 | 23.33 |
| 2 | OAR2_213093422.1   | 201345538 | 0.96 | 1.00 | 0.93 | 0.52 | 0.82 | 0.76 | 1.00 | 0.36 | 31.08 |
| 2 | OAR2_246880633.1   | 233775867 | 0.58 | 0.69 | 0.66 | 0.68 | 0.68 | 0.48 | 0.64 | 0.71 | 23.46 |
| 2 | OAR2_252756874.1   | 239288339 | 0.70 | 0.70 | 0.61 | 0.88 | 0.62 | 0.47 | 0.87 | 0.29 | 23.74 |
| 3 | s72862.1           | 920144    | 0.85 | 0.74 | 0.64 | 0.73 | 0.94 | 0.59 | 0.39 | 0.65 | 25.94 |
| 3 | s24198.1           | 13936611  | 0.73 | 0.84 | 0.48 | 0.49 | 0.51 | 0.41 | 0.93 | 0.69 | 23.25 |
| 3 | OAR3_17669643.1    | 16189589  | 0.78 | 0.53 | 0.52 | 0.52 | 0.68 | 0.59 | 0.51 | 0.80 | 22.49 |
| 3 | s27833.1           | 18533662  | 0.77 | 0.87 | 0.75 | 0.87 | 0.83 | 0.24 | 0.75 | 0.79 | 27.72 |
| 3 | s56018.1           | 18569142  | 0.66 | 0.66 | 0.74 | 0.90 | 0.64 | 0.22 | 0.62 | 0.80 | 24.13 |
| 3 | OAR3_29960338.1    | 27732721  | 0.77 | 0.93 | 0.38 | 0.38 | 0.93 | 0.68 | 0.85 | 0.56 | 25.58 |
| 3 | OAR3_34957910.1    | 32617818  | 0.75 | 0.83 | 0.79 | 0.75 | 0.76 | 0.70 | 0.83 | 0.83 | 30.09 |
| 3 | s62202.1           | 37479731  | 0.36 | 0.83 | 0.66 | 0.86 | 0.84 | 0.25 | 0.40 | 0.83 | 22.72 |
| 3 | OAR3_92984654.1    | 87822190  | 0.51 | 0.46 | 0.83 | 0.67 | 0.63 | 0.72 | 0.58 | 0.71 | 23.64 |

|   |                    |           |      |      |      |      |      |      |      |      |       |
|---|--------------------|-----------|------|------|------|------|------|------|------|------|-------|
| 3 | OAR3_96210394.1    | 90590980  | 0.75 | 0.50 | 0.66 | 0.62 | 0.70 | 0.49 | 0.80 | 0.66 | 23.90 |
| 3 | s12587.1           | 93343121  | 0.77 | 0.64 | 0.69 | 0.46 | 0.70 | 0.37 | 0.80 | 0.84 | 24.37 |
| 3 | OAR3_113978591.1   | 107081459 | 0.68 | 0.68 | 0.66 | 0.58 | 0.69 | 0.56 | 0.68 | 0.51 | 23.16 |
| 3 | s53492.1           | 134161083 | 0.75 | 0.81 | 0.63 | 0.66 | 0.82 | 0.53 | 0.81 | 0.49 | 25.72 |
| 3 | OAR3_143671114.1   | 134479165 | 0.85 | 0.64 | 0.83 | 0.78 | 0.62 | 0.60 | 0.47 | 0.89 | 26.88 |
| 3 | OAR3_155880429.1   | 145971936 | 0.68 | 0.75 | 0.42 | 0.54 | 0.75 | 0.41 | 0.75 | 0.65 | 22.36 |
| 3 | OAR3_163747812.1   | 153184360 | 0.72 | 0.55 | 0.77 | 0.79 | 0.50 | 0.51 | 0.52 | 0.61 | 22.88 |
| 3 | OAR3_195793605_X.1 | 181785624 | 0.77 | 0.82 | 0.38 | 0.52 | 0.80 | 0.41 | 0.53 | 0.76 | 22.69 |
| 3 | OAR3_195832851.1   | 181818709 | 0.77 | 0.82 | 0.41 | 0.52 | 0.80 | 0.41 | 0.50 | 0.71 | 22.41 |
| 3 | OAR3_211975263.1   | 196781108 | 0.59 | 0.87 | 0.63 | 0.71 | 0.75 | 0.48 | 0.77 | 0.71 | 25.67 |
| 3 | s03142.1           | 217226491 | 0.81 | 0.85 | 0.57 | 0.73 | 0.73 | 0.25 | 0.77 | 0.31 | 22.85 |
| 4 | OAR4_4320614.1     | 4142006   | 0.64 | 0.85 | 0.63 | 0.64 | 0.73 | 0.15 | 0.79 | 0.71 | 23.43 |
| 4 | OAR4_8579647.1     | 8554085   | 0.85 | 0.45 | 0.91 | 0.60 | 0.92 | 0.32 | 0.60 | 0.63 | 24.44 |
| 4 | OAR4_14093754.1    | 13881724  | 0.70 | 0.79 | 0.74 | 0.46 | 0.80 | 0.50 | 0.79 | 0.63 | 25.28 |
| 4 | s70608.1           | 14117077  | 0.77 | 0.96 | 0.77 | 0.82 | 0.96 | 0.31 | 0.75 | 0.91 | 29.93 |
| 4 | s29388.1           | 33686327  | 0.72 | 0.72 | 0.63 | 0.70 | 0.73 | 0.38 | 0.53 | 0.72 | 23.55 |
| 4 | OAR4_38097706.1    | 36117155  | 0.86 | 1.00 | 0.71 | 0.92 | 0.91 | 0.62 | 0.23 | 0.81 | 28.92 |
| 4 | s32219.1           | 48304254  | 0.55 | 0.38 | 0.51 | 0.93 | 0.34 | 0.59 | 0.89 | 0.98 | 23.88 |
| 4 | OAR4_60844851.1    | 57694339  | 0.68 | 0.93 | 0.88 | 0.85 | 0.51 | 0.27 | 0.84 | 0.81 | 27.37 |
| 4 | OAR4_60864815.1    | 57713493  | 0.56 | 0.85 | 0.77 | 0.71 | 0.37 | 0.12 | 0.74 | 0.84 | 22.55 |
| 4 | OAR4_62927453.1    | 59566544  | 0.61 | 0.37 | 0.61 | 0.77 | 0.60 | 0.61 | 0.64 | 0.72 | 22.48 |
| 4 | OAR4_68066724.1    | 64328408  | 0.68 | 0.94 | 0.59 | 0.21 | 0.66 | 0.79 | 0.62 | 0.69 | 24.01 |
| 4 | OAR4_94479590.1    | 88983257  | 0.89 | 0.61 | 0.48 | 0.90 | 0.72 | 0.66 | 0.61 | 0.91 | 27.28 |
| 5 | s53436.1           | 13905219  | 0.59 | 0.92 | 0.54 | 0.41 | 0.85 | 0.65 | 0.77 | 0.71 | 25.37 |
| 5 | OAR5_19894072.1    | 17340888  | 0.68 | 0.66 | 0.54 | 0.44 | 0.88 | 0.60 | 0.98 | 0.58 | 24.89 |
| 5 | s71913.1           | 18245590  | 0.61 | 0.78 | 0.76 | 0.76 | 0.76 | 0.18 | 0.72 | 0.81 | 24.88 |

|   |                   |           |      |      |      |      |      |      |      |      |       |
|---|-------------------|-----------|------|------|------|------|------|------|------|------|-------|
| 5 | OAR5_27241937.1   | 24339868  | 0.87 | 0.98 | 0.66 | 0.65 | 0.86 | 0.56 | 0.81 | 0.71 | 29.22 |
| 5 | OAR5_29603897.1   | 26619110  | 0.92 | 0.62 | 0.51 | 0.86 | 0.82 | 0.59 | 0.30 | 0.89 | 25.61 |
| 5 | s63116.1          | 42948823  | 0.82 | 0.71 | 0.62 | 0.64 | 0.75 | 0.69 | 0.66 | 0.65 | 26.15 |
| 5 | OAR5_47016261.1   | 42990841  | 0.81 | 0.78 | 0.57 | 0.59 | 0.79 | 0.74 | 0.69 | 0.60 | 26.17 |
| 5 | OAR5_64198977.1   | 58379550  | 0.55 | 0.47 | 0.44 | 0.75 | 0.75 | 0.80 | 0.52 | 0.62 | 22.33 |
| 5 | OAR5_67400660.1   | 61248799  | 0.59 | 0.59 | 0.83 | 0.87 | 0.38 | 0.75 | 0.91 | 0.67 | 26.55 |
| 5 | OAR5_67426945.1   | 61268389  | 0.36 | 0.73 | 0.77 | 0.87 | 0.38 | 0.69 | 0.91 | 0.67 | 25.29 |
| 5 | OAR5_67605574.1   | 61448352  | 0.72 | 0.55 | 0.63 | 0.73 | 0.62 | 0.78 | 0.87 | 0.69 | 26.35 |
| 5 | OAR5_67725472_X.1 | 61562358  | 0.81 | 0.72 | 0.71 | 0.78 | 0.58 | 0.90 | 0.83 | 0.87 | 30.01 |
| 5 | s01547.1          | 63523431  | 0.89 | 0.55 | 0.84 | 0.60 | 0.62 | 0.60 | 0.60 | 0.78 | 25.81 |
| 5 | s01265.1          | 63546724  | 0.87 | 0.87 | 0.86 | 0.77 | 0.61 | 0.69 | 0.87 | 0.73 | 30.51 |
| 5 | s75037.1          | 67865996  | 0.83 | 0.96 | 0.83 | 0.70 | 0.90 | 0.62 | 0.44 | 0.32 | 26.56 |
| 5 | s34559.1          | 68392726  | 0.83 | 0.77 | 0.72 | 0.75 | 0.78 | 0.74 | 0.47 | 0.10 | 24.09 |
| 6 | OAR6_17199790.1   | 14419851  | 0.70 | 0.50 | 0.70 | 0.66 | 0.49 | 0.34 | 0.91 | 0.77 | 23.17 |
| 6 | OAR6_33210385.1   | 29372590  | 0.87 | 0.77 | 0.40 | 0.53 | 0.87 | 0.59 | 0.50 | 0.56 | 23.18 |
| 6 | OAR6_33453920.1   | 29609130  | 0.83 | 0.94 | 0.71 | 1.00 | 0.98 | 0.59 | 0.47 | 0.93 | 31.17 |
| 6 | s37521.1          | 34965214  | 0.74 | 0.77 | 0.54 | 0.85 | 0.19 | 0.54 | 0.49 | 0.80 | 22.40 |
| 6 | OAR6_64114132.1   | 58220575  | 0.58 | 0.63 | 0.60 | 0.59 | 0.49 | 0.52 | 0.77 | 0.86 | 23.14 |
| 6 | OAR6_68186441.1   | 62069219  | 0.87 | 0.79 | 0.48 | 0.66 | 0.74 | 0.69 | 0.50 | 0.82 | 25.97 |
| 6 | OAR6_69728277.1   | 63262102  | 0.72 | 0.55 | 0.84 | 0.88 | 0.48 | 0.68 | 0.60 | 0.34 | 23.61 |
| 6 | OAR6_93791340.1   | 85600434  | 0.45 | 0.58 | 0.60 | 0.55 | 0.75 | 0.38 | 0.80 | 0.85 | 22.49 |
| 6 | s15912.1          | 114631910 | 0.53 | 0.87 | 0.79 | 0.63 | 0.76 | 0.77 | 0.92 | 0.52 | 27.52 |
| 7 | OAR7_21705646.1   | 20823806  | 0.53 | 0.77 | 0.62 | 0.74 | 0.70 | 0.73 | 0.61 | 0.79 | 25.76 |
| 7 | OAR7_33605191.1   | 29834504  | 0.81 | 0.66 | 0.63 | 0.66 | 0.28 | 0.78 | 0.64 | 0.60 | 23.51 |
| 7 | OAR7_36652030.1   | 32477867  | 0.77 | 0.87 | 0.47 | 0.74 | 0.85 | 0.87 | 0.89 | 0.53 | 28.64 |
| 7 | OAR7_60254585.1   | 54439369  | 0.87 | 0.87 | 0.86 | 0.86 | 0.83 | 0.82 | 0.81 | 0.79 | 33.02 |

|   |                   |          |      |      |      |      |      |      |      |      |       |
|---|-------------------|----------|------|------|------|------|------|------|------|------|-------|
| 7 | OAR7_62972902.1   | 56858176 | 0.74 | 0.74 | 0.58 | 0.72 | 0.72 | 0.63 | 0.15 | 0.71 | 22.80 |
| 7 | OAR7_63692612.1   | 57764872 | 0.64 | 0.67 | 0.73 | 0.46 | 0.55 | 0.78 | 0.55 | 0.69 | 23.49 |
| 7 | OAR7_63745942.1   | 57816492 | 0.69 | 0.67 | 0.80 | 0.49 | 0.82 | 0.75 | 0.81 | 0.81 | 27.83 |
| 7 | OAR7_71146927.1   | 64945291 | 0.79 | 0.69 | 0.74 | 0.71 | 0.78 | 0.10 | 0.60 | 0.63 | 22.91 |
| 7 | OAR7_71507644.1   | 65314697 | 0.83 | 0.61 | 0.60 | 0.72 | 0.84 | 0.34 | 0.61 | 0.77 | 24.47 |
| 7 | OAR7_91765475.1   | 84304384 | 0.74 | 0.74 | 0.48 | 0.72 | 0.75 | 0.67 | 0.74 | 0.61 | 25.50 |
| 7 | OAR7_96995223.1   | 89156865 | 0.67 | 0.94 | 0.69 | 0.85 | 0.67 | 0.16 | 0.67 | 0.69 | 24.62 |
| 7 | OAR7_97009654.1   | 89171610 | 0.75 | 0.96 | 0.76 | 0.65 | 0.74 | 0.01 | 0.64 | 0.76 | 24.17 |
| 8 | OAR9_760.1        | 2459     | 0.77 | 0.58 | 0.48 | 0.68 | 0.80 | 0.49 | 0.38 | 0.85 | 22.81 |
| 8 | OAR8_30023587.1   | 27526693 | 0.34 | 0.71 | 0.44 | 0.68 | 0.73 | 0.69 | 0.87 | 0.73 | 23.90 |
| 8 | OAR8_32693991.1   | 30169514 | 0.66 | 0.66 | 0.60 | 0.64 | 0.64 | 0.58 | 0.66 | 0.52 | 22.75 |
| 8 | OAR8_48645293.1   | 45154596 | 0.80 | 0.69 | 0.69 | 0.68 | 0.62 | 0.53 | 0.75 | 0.43 | 24.12 |
| 8 | s34333.1          | 47947284 | 0.82 | 0.50 | 0.28 | 0.43 | 0.85 | 0.66 | 0.66 | 0.77 | 22.47 |
| 8 | OAR8_55339073.1   | 51474008 | 0.64 | 0.69 | 0.35 | 0.55 | 0.84 | 0.77 | 0.77 | 0.63 | 24.19 |
| 8 | OAR8_60543455.1   | 56536992 | 0.96 | 0.89 | 0.64 | 0.38 | 0.90 | 0.76 | 0.81 | 0.52 | 27.96 |
| 8 | s61733.1          | 56613713 | 0.73 | 0.84 | 0.42 | 0.54 | 0.87 | 0.46 | 0.89 | 0.74 | 25.56 |
| 8 | OAR8_60730321.1   | 56705959 | 0.64 | 0.55 | 0.51 | 0.79 | 0.87 | 0.74 | 0.29 | 0.71 | 23.38 |
| 8 | OAR8_61394328.1   | 57306669 | 0.53 | 0.70 | 0.64 | 0.30 | 0.88 | 0.73 | 0.39 | 0.83 | 22.87 |
| 8 | s66468.1          | 68307147 | 0.57 | 0.77 | 0.53 | 0.43 | 0.57 | 0.53 | 0.93 | 0.65 | 22.79 |
| 8 | OAR8_74032292.1   | 69011617 | 0.66 | 0.78 | 0.56 | 0.75 | 0.76 | 0.74 | 0.72 | 0.68 | 26.76 |
| 8 | s56071.1          | 72441567 | 0.75 | 0.57 | 0.72 | 0.34 | 0.76 | 0.81 | 0.61 | 0.70 | 24.60 |
| 8 | s50153.1          | 74816521 | 0.40 | 0.87 | 0.63 | 0.73 | 0.98 | 0.59 | 0.72 | 0.76 | 26.77 |
| 8 | s48807.1          | 85410438 | 0.36 | 0.71 | 0.68 | 0.71 | 0.51 | 0.69 | 0.51 | 0.87 | 23.15 |
| 9 | s05716.1          | 17269965 | 0.63 | 0.74 | 0.65 | 0.42 | 0.82 | 0.08 | 0.76 | 0.87 | 22.50 |
| 9 | OAR9_28653165.1   | 27379811 | 0.61 | 0.69 | 0.83 | 0.64 | 0.70 | 0.52 | 0.82 | 0.38 | 24.16 |
| 9 | OAR9_28704738_X.1 | 27431994 | 0.64 | 0.56 | 0.86 | 0.49 | 0.66 | 0.48 | 0.84 | 0.35 | 22.45 |

|    |                  |          |      |      |      |      |      |      |      |      |       |
|----|------------------|----------|------|------|------|------|------|------|------|------|-------|
| 9  | OAR9_37300722.1  | 35414177 | 0.59 | 0.76 | 0.71 | 0.61 | 0.78 | 0.52 | 0.74 | 0.68 | 25.26 |
| 9  | OAR9_71011585.1  | 66993812 | 0.82 | 0.79 | 0.74 | 0.79 | 0.31 | 0.84 | 0.69 | 0.69 | 27.07 |
| 9  | OAR9_81293209.1  | 76704045 | 0.72 | 0.85 | 0.63 | 0.68 | 0.60 | 0.49 | 0.82 | 0.85 | 26.48 |
| 9  | OAR9_92965915.1  | 87717571 | 0.89 | 0.66 | 0.61 | 0.57 | 0.74 | 0.37 | 0.70 | 0.72 | 24.32 |
| 10 | s63205.1         | 9909833  | 0.54 | 0.87 | 0.77 | 0.71 | 0.29 | 0.57 | 0.75 | 0.86 | 25.14 |
| 10 | OAR10_24992778.1 | 25086996 | 0.49 | 0.70 | 0.49 | 0.33 | 0.64 | 0.78 | 0.83 | 0.98 | 24.20 |
| 10 | OAR10_28516285.1 | 28502457 | 0.59 | 0.89 | 0.74 | 0.82 | 0.73 | 0.55 | 0.57 | 0.89 | 27.35 |
| 10 | OAR10_29223007.1 | 29188403 | 0.70 | 0.92 | 0.88 | 0.63 | 0.86 | 0.97 | 0.98 | 0.72 | 32.80 |
| 10 | s02289.1         | 29202499 | 0.75 | 0.75 | 0.69 | 0.51 | 0.75 | 0.66 | 0.57 | 0.74 | 25.44 |
| 10 | OAR10_50832739.1 | 50003887 | 0.82 | 0.36 | 0.88 | 0.40 | 0.94 | 0.78 | 0.93 | 0.44 | 26.36 |
| 10 | OAR10_51830650.1 | 50876668 | 0.83 | 0.72 | 0.69 | 0.62 | 0.84 | 0.15 | 0.83 | 0.77 | 25.26 |
| 10 | OAR10_59202250.1 | 58028982 | 0.36 | 0.50 | 0.80 | 0.95 | 0.66 | 0.63 | 0.82 | 0.65 | 25.07 |
| 10 | OAR10_65844667.1 | 63849945 | 0.89 | 0.87 | 0.69 | 0.98 | 0.92 | 0.95 | 0.94 | 0.98 | 35.75 |
| 10 | OAR10_69217913.1 | 66966639 | 0.87 | 0.82 | 0.71 | 0.86 | 0.88 | 0.58 | 0.79 | 0.87 | 30.89 |
| 10 | s52066.1         | 76379406 | 0.54 | 0.67 | 0.68 | 0.38 | 0.71 | 0.67 | 0.70 | 0.63 | 22.89 |
| 10 | s52900.1         | 85889796 | 0.70 | 0.82 | 0.72 | 0.85 | 0.78 | 0.78 | 0.87 | 0.84 | 30.82 |
| 11 | s29885.1         | 18759252 | 0.59 | 0.67 | 0.60 | 0.88 | 0.82 | 0.87 | 0.84 | 0.51 | 27.52 |
| 11 | s17310.1         | 19385272 | 0.84 | 0.73 | 0.83 | 0.43 | 0.21 | 0.47 | 0.89 | 0.70 | 23.68 |
| 11 | s11660.1         | 41465606 | 0.19 | 0.76 | 0.71 | 0.36 | 0.55 | 0.82 | 0.69 | 0.79 | 22.34 |
| 11 | OAR11_46036985.1 | 43267998 | 0.33 | 0.61 | 0.70 | 0.63 | 0.65 | 0.72 | 0.61 | 0.69 | 22.64 |
| 11 | s27794.1         | 43375182 | 0.67 | 0.79 | 0.60 | 0.77 | 0.76 | 0.42 | 0.73 | 0.45 | 23.87 |
| 11 | s26322.1         | 52708895 | 0.74 | 0.80 | 0.72 | 0.48 | 0.60 | 0.59 | 0.47 | 0.56 | 22.81 |
| 12 | s60216.1         | 4813704  | 0.79 | 0.76 | 0.54 | 0.67 | 0.80 | 0.61 | 0.76 | 0.33 | 24.32 |
| 12 | OAR12_15898442.1 | 13230931 | 0.75 | 0.61 | 0.56 | 0.49 | 0.59 | 0.78 | 0.64 | 0.93 | 24.94 |
| 12 | OAR12_20263016.1 | 17379635 | 0.85 | 0.87 | 0.86 | 0.58 | 0.65 | 0.58 | 0.74 | 0.71 | 27.99 |
| 12 | OAR12_20919634.1 | 18039881 | 0.63 | 0.73 | 0.71 | 0.70 | 0.73 | 0.38 | 0.73 | 0.46 | 23.25 |

|    |                    |          |      |      |      |      |      |      |      |      |       |
|----|--------------------|----------|------|------|------|------|------|------|------|------|-------|
| 12 | s48775.1           | 38966266 | 0.79 | 0.72 | 0.69 | 0.49 | 0.80 | 0.59 | 0.49 | 0.96 | 25.89 |
| 12 | OAR12_43408733.1   | 39002907 | 0.79 | 0.72 | 0.69 | 0.49 | 0.80 | 0.56 | 0.49 | 0.96 | 25.72 |
| 12 | s27291.1           | 51724365 | 0.60 | 0.64 | 0.88 | 0.65 | 0.64 | 0.65 | 0.83 | 0.13 | 23.35 |
| 12 | s65734.1           | 68272648 | 0.68 | 0.64 | 0.77 | 0.34 | 0.70 | 0.53 | 0.75 | 0.96 | 25.04 |
| 12 | OAR12_81633377.1   | 74114369 | 0.61 | 0.62 | 0.74 | 0.65 | 0.56 | 0.71 | 0.85 | 0.74 | 25.81 |
| 12 | s01191.1           | 74167822 | 0.27 | 0.73 | 0.75 | 0.51 | 0.65 | 0.66 | 0.93 | 0.62 | 23.73 |
| 13 | OAR13_24394537.1   | 21881830 | 0.68 | 0.87 | 0.62 | 0.62 | 0.62 | 0.18 | 0.81 | 0.89 | 24.33 |
| 13 | OAR13_24544219.1   | 22028605 | 0.64 | 0.87 | 0.81 | 0.75 | 0.62 | 0.11 | 0.85 | 0.89 | 25.84 |
| 13 | OAR13_24835229.1   | 22312756 | 0.66 | 0.79 | 0.80 | 0.67 | 0.87 | 0.52 | 0.89 | 0.53 | 27.24 |
| 13 | OAR13_29815318.1   | 26939029 | 0.80 | 0.48 | 0.77 | 0.57 | 0.46 | 0.60 | 0.82 | 0.58 | 23.55 |
| 13 | OAR13_29868000.1   | 26997342 | 0.85 | 0.55 | 0.84 | 0.65 | 0.54 | 0.68 | 0.87 | 0.63 | 26.69 |
| 13 | OAR13_60855392.1   | 55970160 | 0.82 | 0.46 | 0.77 | 0.74 | 0.78 | 0.55 | 0.31 | 0.82 | 24.32 |
| 13 | OAR13_73412719.1   | 68241391 | 0.71 | 0.74 | 0.69 | 0.65 | 0.75 | 0.63 | 0.33 | 0.74 | 24.36 |
| 13 | OAR13_73486401.1   | 68306113 | 0.71 | 0.74 | 0.69 | 0.65 | 0.75 | 0.51 | 0.36 | 0.64 | 23.23 |
| 13 | OAR13_80086479.1   | 74377028 | 0.77 | 0.79 | 0.57 | 0.62 | 0.85 | 0.75 | 0.79 | 0.38 | 25.95 |
| 13 | OAR13_80474846.1   | 74772124 | 0.89 | 0.91 | 0.95 | 0.79 | 0.85 | 0.81 | 0.91 | 0.81 | 34.31 |
| 13 | OAR13_80560030.1   | 74859132 | 0.84 | 0.87 | 0.88 | 0.73 | 0.71 | 0.75 | 0.87 | 0.73 | 31.08 |
| 13 | s75919.1           | 78004271 | 0.89 | 0.93 | 0.83 | 0.76 | 0.96 | 0.75 | 0.93 | 0.77 | 33.59 |
| 14 | OAR14_15210238.1   | 14953941 | 0.65 | 0.68 | 0.58 | 0.54 | 0.66 | 0.64 | 0.68 | 0.68 | 23.50 |
| 14 | OAR14_15705649_X.1 | 15438181 | 0.89 | 0.64 | 0.46 | 0.43 | 0.54 | 0.81 | 0.61 | 0.66 | 23.33 |
| 14 | s45533.1           | 33094234 | 0.77 | 0.65 | 0.58 | 0.57 | 0.77 | 0.74 | 0.74 | 0.58 | 25.21 |
| 15 | s74830.1           | 7575809  | 0.37 | 0.70 | 0.44 | 0.76 | 0.67 | 0.46 | 0.74 | 0.81 | 22.37 |
| 15 | OAR15_34772476.1   | 33118615 | 0.66 | 0.77 | 0.54 | 0.98 | 0.86 | 0.68 | 0.47 | 0.63 | 26.11 |
| 15 | OAR15_35681300.1   | 33931575 | 0.42 | 0.77 | 0.75 | 0.57 | 0.77 | 0.55 | 0.74 | 0.52 | 23.41 |
| 16 | OAR16_9610934.1    | 8760018  | 0.64 | 0.52 | 0.51 | 0.65 | 0.78 | 0.69 | 0.52 | 0.76 | 23.25 |
| 16 | OAR16_19296989.1   | 17491152 | 0.72 | 0.53 | 0.70 | 0.70 | 0.55 | 0.45 | 0.72 | 0.72 | 23.49 |

|    |                  |          |      |      |      |      |      |      |      |      |       |
|----|------------------|----------|------|------|------|------|------|------|------|------|-------|
| 16 | OAR16_60658467.1 | 55603528 | 0.74 | 0.85 | 0.61 | 0.32 | 0.90 | 0.41 | 0.92 | 0.40 | 23.78 |
| 16 | s36879.1         | 56455419 | 0.18 | 0.59 | 0.69 | 0.71 | 0.96 | 0.44 | 0.64 | 0.72 | 22.32 |
| 16 | s69802.1         | 56577830 | 0.55 | 0.62 | 0.71 | 0.60 | 0.98 | 0.76 | 0.87 | 0.74 | 27.83 |
| 17 | s74460.1         | 9546160  | 0.79 | 0.87 | 0.62 | 0.76 | 0.73 | 0.69 | 0.79 | 0.73 | 28.58 |
| 17 | OAR17_10638840.1 | 9579009  | 0.72 | 0.50 | 0.62 | 0.64 | 0.25 | 0.75 | 0.84 | 0.69 | 23.16 |
| 17 | OAR17_31805652.1 | 29036982 | 0.60 | 0.84 | 0.66 | 0.41 | 0.53 | 0.62 | 0.77 | 0.61 | 23.18 |
| 17 | OAR17_31867704.1 | 29099210 | 0.63 | 0.75 | 0.76 | 0.24 | 0.55 | 0.64 | 0.66 | 0.74 | 22.92 |
| 17 | OAR17_38448146.1 | 35423021 | 0.54 | 0.59 | 0.57 | 0.68 | 0.71 | 0.68 | 0.79 | 0.71 | 24.50 |
| 18 | OAR18_49661899.1 | 46642071 | 0.58 | 0.84 | 0.71 | 0.80 | 0.88 | 0.82 | 0.36 | 0.34 | 24.88 |
| 18 | OAR18_61310611.1 | 57472621 | 0.60 | 0.49 | 0.91 | 0.60 | 0.74 | 0.65 | 0.68 | 0.78 | 25.64 |
| 18 | OAR18_70842719.1 | 66756616 | 0.81 | 0.66 | 0.76 | 0.69 | 0.76 | 0.39 | 0.67 | 0.75 | 25.67 |
| 18 | s48176.1         | 67289143 | 0.82 | 0.87 | 0.83 | 0.24 | 0.73 | 0.65 | 0.82 | 0.57 | 26.26 |
| 19 | s29913.1         | 916549   | 0.21 | 0.32 | 0.74 | 0.75 | 0.80 | 0.71 | 0.68 | 0.78 | 22.80 |
| 19 | OAR19_48620861.1 | 46183134 | 0.84 | 0.84 | 0.88 | 0.82 | 0.83 | 0.81 | 0.82 | 0.82 | 32.65 |
| 20 | OAR20_10249189.1 | 10109112 | 0.89 | 0.48 | 0.83 | 0.88 | 0.31 | 0.45 | 0.59 | 0.68 | 23.68 |
| 20 | s46840.1         | 36717434 | 0.76 | 0.60 | 0.60 | 0.59 | 0.85 | 0.45 | 0.69 | 0.81 | 24.79 |
| 20 | OAR20_54293452.1 | 49822123 | 0.89 | 0.86 | 0.30 | 0.50 | 0.78 | 0.75 | 0.77 | 0.64 | 25.59 |
| 21 | s37779.1         | 31372462 | 0.87 | 0.84 | 0.33 | 0.28 | 0.47 | 0.42 | 0.89 | 0.89 | 22.70 |
| 22 | OAR22_6293170.1  | 5271128  | 0.69 | 0.68 | 0.62 | 0.80 | 0.63 | 0.62 | 0.51 | 0.46 | 22.94 |
| 22 | OAR22_25489482.1 | 21644518 | 0.72 | 0.85 | 0.61 | 0.63 | 0.92 | 0.68 | 0.66 | 0.58 | 26.66 |
| 22 | OAR22_36996817.1 | 32194893 | 0.50 | 0.52 | 0.71 | 0.43 | 0.80 | 0.68 | 0.84 | 0.81 | 24.72 |
| 22 | OAR22_37025442.1 | 32223607 | 0.47 | 0.52 | 0.74 | 0.40 | 0.46 | 0.75 | 0.84 | 0.84 | 23.24 |
| 23 | OAR23_21580936.1 | 20363654 | 0.94 | 0.30 | 0.67 | 0.46 | 0.54 | 0.62 | 0.79 | 0.80 | 23.71 |
| 23 | OAR23_48878158.1 | 46167308 | 0.54 | 0.70 | 0.69 | 0.57 | 0.87 | 0.53 | 0.45 | 0.65 | 22.97 |
| 23 | s04819.1         | 47503671 | 0.77 | 0.41 | 0.77 | 0.64 | 0.42 | 0.65 | 0.66 | 0.65 | 23.03 |
| 23 | s43150.1         | 47511740 | 0.77 | 0.41 | 0.77 | 0.64 | 0.42 | 0.65 | 0.66 | 0.65 | 23.03 |

|    |                    |          |      |      |      |      |      |      |      |      |       |
|----|--------------------|----------|------|------|------|------|------|------|------|------|-------|
| 23 | OAR23_59952060.1   | 56300415 | 0.60 | 0.87 | 0.36 | 0.70 | 0.90 | 0.56 | 0.53 | 0.54 | 22.98 |
| 24 | s16016.1           | 24591560 | 0.49 | 0.74 | 0.74 | 0.93 | 0.90 | 0.38 | 0.85 | 0.96 | 28.37 |
| 24 | s00643.1           | 24846522 | 0.94 | 1.00 | 0.43 | 0.78 | 0.70 | 0.35 | 0.39 | 0.89 | 25.32 |
| 24 | OAR24_27348134_X.1 | 24859938 | 0.72 | 0.85 | 0.54 | 0.78 | 0.72 | 0.05 | 0.39 | 0.93 | 22.32 |
| 24 | OAR24_27411708.1   | 24925070 | 0.70 | 0.91 | 0.64 | 0.74 | 0.83 | 0.53 | 0.75 | 0.93 | 28.79 |
| 24 | s07554.1           | 28405516 | 0.78 | 0.67 | 0.60 | 0.79 | 0.73 | 0.75 | 0.58 | 0.78 | 26.82 |
| 24 | s17819.1           | 37202588 | 0.64 | 0.79 | 0.52 | 0.79 | 0.71 | 0.75 | 0.36 | 0.63 | 23.92 |
| 25 | s09722.1           | 9173663  | 0.89 | 0.77 | 0.45 | 0.20 | 0.96 | 0.35 | 0.68 | 0.89 | 23.70 |
| 25 | OAR25_15495515.1   | 15121093 | 0.66 | 0.72 | 0.64 | 0.60 | 0.54 | 0.48 | 0.72 | 0.58 | 22.58 |
| 25 | s56125.1           | 39254408 | 0.82 | 0.69 | 0.68 | 0.31 | 0.75 | 0.66 | 0.69 | 0.82 | 25.36 |
| 25 | s44634.1           | 40388416 | 0.53 | 0.68 | 0.54 | 0.81 | 0.84 | 0.71 | 0.81 | 0.56 | 25.51 |
| 25 | OAR25_43417329.1   | 41096160 | 0.42 | 0.72 | 0.56 | 0.39 | 0.80 | 0.56 | 0.77 | 0.83 | 23.03 |
| 26 | OAR26_12979568.1   | 10434838 | 0.74 | 0.74 | 0.69 | 0.44 | 0.72 | 0.52 | 0.71 | 0.46 | 23.09 |
| 26 | OAR26_38406348_X.1 | 33708849 | 0.50 | 0.55 | 0.60 | 0.50 | 0.87 | 0.81 | 0.77 | 0.84 | 25.40 |

Notes: Significant SNPs located within merged genomic regions are colored "red".



**Table S6. Highly differentiated genomic regions between Bhyanglung and low-land sheep breeds**

| CHR | Start(bp) | End(bp)   | Length | Number of SNPs | Max Di | Min Di | Mean Di |
|-----|-----------|-----------|--------|----------------|--------|--------|---------|
| 1   | 99931717  | 100185774 | 254057 | 2              | 37.45  | 29.80  | 33.63   |
| 2   | 110291246 | 110743186 | 451940 | 2              | 26.51  | 26.40  | 26.45   |
| 2   | 220053519 | 220103004 | 49485  | 2              | 28.66  | 23.85  | 26.26   |
| 2   | 237813990 | 237822440 | 8450   | 2              | 30.57  | 26.58  | 28.58   |
| 3   | 41551185  | 41793029  | 241844 | 2              | 32.75  | 23.03  | 27.89   |
| 3   | 92401501  | 92497164  | 95663  | 2              | 25.82  | 23.19  | 24.50   |
| 3   | 93522006  | 93725974  | 203968 | 2              | 22.81  | 22.54  | 22.68   |
| 4   | 13881724  | 14355529  | 473805 | 2              | 25.51  | 24.22  | 24.86   |
| 4   | 48201750  | 48669962  | 468212 | 7              | 48.98  | 25.82  | 36.44   |
| 5   | 51535099  | 51587928  | 52829  | 2              | 26.66  | 22.80  | 24.73   |
| 6   | 94639943  | 94749679  | 109736 | 2              | 38.65  | 23.13  | 30.89   |
| 7   | 15988141  | 15995141  | 7000   | 2              | 31.77  | 21.85  | 26.81   |
| 7   | 57692469  | 57915106  | 222637 | 5              | 54.92  | 28.48  | 45.42   |
| 8   | 38108511  | 38129829  | 21318  | 2              | 32.88  | 30.70  | 31.79   |
| 10  | 29054709  | 29806294  | 751585 | 5              | 50.62  | 23.19  | 35.21   |
| 10  | 30618253  | 30700853  | 82600  | 3              | 25.30  | 22.58  | 23.68   |
| 11  | 7858660   | 7898325   | 39665  | 2              | 24.28  | 24.26  | 24.27   |
| 11  | 19223203  | 19397667  | 174464 | 3              | 29.32  | 24.31  | 27.33   |
| 11  | 22780752  | 22814442  | 33690  | 2              | 37.33  | 36.98  | 37.15   |
| 11  | 26421905  | 26872280  | 450375 | 2              | 24.52  | 22.51  | 23.52   |
| 12  | 38923821  | 39002907  | 79086  | 2              | 30.45  | 25.96  | 28.20   |
| 13  | 32586633  | 32625552  | 38919  | 2              | 22.88  | 21.82  | 22.35   |
| 16  | 30655866  | 30720540  | 64674  | 3              | 29.47  | 25.57  | 27.37   |
| 16  | 70710282  | 70922464  | 212182 | 3              | 26.97  | 24.74  | 25.91   |
| 19  | 34817411  | 34838172  | 20761  | 2              | 24.77  | 22.88  | 23.82   |
| 20  | 34168829  | 34256995  | 88166  | 2              | 41.67  | 30.62  | 36.15   |
| 22  | 42969386  | 43182266  | 212880 | 2              | 25.21  | 23.30  | 24.26   |
| 23  | 32282622  | 32466427  | 183805 | 4              | 33.48  | 23.28  | 27.35   |

**Table S7. Highly differentiated genomic regions between Tibetan and low-land sheep breeds**

| <b>CHR</b> | <b>Start(bp)</b> | <b>End(bp)</b> | <b>Length</b> | <b>Number of SNPs</b> | <b>Max Di</b> | <b>Min Di</b> | <b>Mean Di</b> |
|------------|------------------|----------------|---------------|-----------------------|---------------|---------------|----------------|
| 1          | 73928927         | 74316221       | 387294        | 2                     | 25.28         | 22.85         | 24.06          |
| 1          | 99931717         | 100185774      | 254057        | 2                     | 42.20         | 26.57         | 34.38          |
| 1          | 183336939        | 183575060      | 238121        | 3                     | 37.38         | 28.75         | 33.04          |
| 2          | 100199475        | 100364649      | 165174        | 2                     | 34.10         | 26.90         | 30.50          |
| 2          | 135304995        | 135636519      | 331524        | 3                     | 39.22         | 23.04         | 29.38          |
| 2          | 237813990        | 237822440      | 8450          | 2                     | 29.66         | 28.21         | 28.93          |
| 3          | 39851694         | 40956953       | 1105259       | 10                    | 41.88         | 22.64         | 32.98          |
| 3          | 79473981         | 79511180       | 37199         | 2                     | 25.09         | 22.91         | 24.00          |
| 4          | 48304254         | 48669962       | 365708        | 3                     | 50.74         | 28.75         | 36.08          |
| 4          | 87572495         | 87649810       | 77315         | 3                     | 46.37         | 37.02         | 41.57          |
| 5          | 15912332         | 16520048       | 607716        | 4                     | 27.19         | 25.12         | 25.88          |
| 5          | 19778519         | 19986771       | 208252        | 2                     | 26.23         | 23.24         | 24.73          |
| 5          | 51535099         | 51587928       | 52829         | 2                     | 33.53         | 25.12         | 29.32          |
| 7          | 42463209         | 42551974       | 88765         | 2                     | 40.15         | 38.07         | 39.11          |
| 7          | 57631745         | 57915106       | 283361        | 5                     | 48.98         | 23.23         | 39.27          |
| 8          | 38046068         | 38129829       | 83761         | 3                     | 35.43         | 32.50         | 33.70          |
| 9          | 77297358         | 77756891       | 459533        | 2                     | 27.53         | 24.84         | 26.19          |
| 10         | 29054709         | 29806294       | 751585        | 5                     | 49.84         | 27.49         | 38.79          |
| 10         | 30674002         | 30700853       | 26851         | 2                     | 27.22         | 25.29         | 26.25          |
| 11         | 19385272         | 19397667       | 12395         | 2                     | 36.00         | 26.64         | 31.32          |
| 11         | 22736347         | 22814442       | 78095         | 3                     | 31.59         | 24.80         | 29.11          |
| 12         | 38843578         | 39002907       | 159329        | 3                     | 38.33         | 29.85         | 34.67          |
| 12         | 64847102         | 64870223       | 23121         | 2                     | 25.01         | 24.28         | 24.64          |
| 13         | 78004271         | 78420224       | 415953        | 2                     | 28.94         | 27.18         | 28.06          |
| 15         | 31492057         | 31723078       | 231021        | 2                     | 26.54         | 23.77         | 25.16          |
| 15         | 72707350         | 72747023       | 39673         | 2                     | 33.05         | 23.58         | 28.31          |
| 16         | 30655866         | 30847022       | 191156        | 3                     | 24.92         | 24.08         | 24.50          |
| 16         | 70900966         | 70922464       | 21498         | 2                     | 27.03         | 26.23         | 26.63          |
| 17         | 1440961          | 1509630        | 68669         | 2                     | 38.34         | 23.81         | 31.08          |
| 17         | 12319170         | 12471246       | 152076        | 2                     | 25.65         | 25.49         | 25.57          |
| 17         | 53470559         | 53511490       | 40931         | 3                     | 33.00         | 28.51         | 30.85          |
| 18         | 19342316         | 19399095       | 56779         | 2                     | 28.51         | 24.62         | 26.57          |
| 18         | 44805751         | 44858471       | 52720         | 2                     | 26.50         | 25.40         | 25.95          |
| 20         | 34168829         | 34256995       | 88166         | 2                     | 33.58         | 25.06         | 29.32          |
| 22         | 42969386         | 43123707       | 154321        | 2                     | 28.64         | 25.17         | 26.90          |
| 23         | 25919106         | 25972928       | 53822         | 2                     | 44.46         | 27.00         | 35.73          |

**Table S8. Highly differentiated genomic regions between Changthangi and low-land sheep breeds**

| CHR | Start(bp) | End(bp)   | Length | Number of SNPs | Max Di | Min Di | Mean Di |
|-----|-----------|-----------|--------|----------------|--------|--------|---------|
| 1   | 99931717  | 100185774 | 254057 | 2              | 32.27  | 27.08  | 29.67   |
| 1   | 247826668 | 248275678 | 449010 | 2              | 32.97  | 22.69  | 27.83   |
| 2   | 30919873  | 31018254  | 98381  | 2              | 28.04  | 23.58  | 25.81   |
| 2   | 81785728  | 82346323  | 560595 | 3              | 29.85  | 21.76  | 25.78   |
| 2   | 164516447 | 164594319 | 77872  | 2              | 25.41  | 23.68  | 24.55   |
| 2   | 232414241 | 232485668 | 71427  | 2              | 33.66  | 22.64  | 28.15   |
| 2   | 237813990 | 237822440 | 8450   | 2              | 28.75  | 28.75  | 28.75   |
| 3   | 62015360  | 62044832  | 29472  | 2              | 34.87  | 30.83  | 32.85   |
| 3   | 108409583 | 108434471 | 24888  | 3              | 30.82  | 21.58  | 25.01   |
| 3   | 162819252 | 163307018 | 487766 | 2              | 31.67  | 27.83  | 29.75   |
| 3   | 165413630 | 165785278 | 371648 | 2              | 26.14  | 22.29  | 24.22   |
| 3   | 178423049 | 178743725 | 320676 | 4              | 28.71  | 21.20  | 24.12   |
| 3   | 180817708 | 180839858 | 22150  | 2              | 25.14  | 21.55  | 23.35   |
| 4   | 48304254  | 48669962  | 365708 | 3              | 36.44  | 21.14  | 28.51   |
| 4   | 75968047  | 76007878  | 39831  | 2              | 31.74  | 24.41  | 28.08   |
| 4   | 87572495  | 87649810  | 77315  | 2              | 26.86  | 23.30  | 25.08   |
| 5   | 40487686  | 40713566  | 225880 | 2              | 27.30  | 21.84  | 24.57   |
| 5   | 51587928  | 51843084  | 255156 | 2              | 25.43  | 24.71  | 25.07   |
| 7   | 42463209  | 42551974  | 88765  | 2              | 25.13  | 21.25  | 23.19   |
| 7   | 57692469  | 57915106  | 222637 | 5              | 51.10  | 34.34  | 43.55   |
| 7   | 79817839  | 79831939  | 14100  | 2              | 23.43  | 21.51  | 22.47   |
| 7   | 89286934  | 89519883  | 232949 | 2              | 21.75  | 21.34  | 21.54   |
| 8   | 10725738  | 10820850  | 95112  | 2              | 26.15  | 22.85  | 24.50   |
| 9   | 61628833  | 61661127  | 32294  | 2              | 27.38  | 21.01  | 24.20   |
| 9   | 77297358  | 77756891  | 459533 | 2              | 33.76  | 33.58  | 33.67   |
| 10  | 29054709  | 29502667  | 447958 | 4              | 35.75  | 21.85  | 29.06   |
| 11  | 19223203  | 19397667  | 174464 | 3              | 29.65  | 24.63  | 27.03   |
| 11  | 22780752  | 22814442  | 33690  | 2              | 25.95  | 25.60  | 25.78   |
| 11  | 49142365  | 49193942  | 51577  | 2              | 23.84  | 22.63  | 23.24   |
| 12  | 38843578  | 39002907  | 159329 | 3              | 30.68  | 24.02  | 26.28   |
| 15  | 42070930  | 42207222  | 136292 | 2              | 23.01  | 22.69  | 22.85   |
| 16  | 34279856  | 34315060  | 35204  | 2              | 32.04  | 25.95  | 28.99   |
| 17  | 21434752  | 21454166  | 19414  | 2              | 29.33  | 24.92  | 27.13   |
| 18  | 19342316  | 19399095  | 56779  | 2              | 25.35  | 23.92  | 24.64   |
| 20  | 34168829  | 34256995  | 88166  | 2              | 32.03  | 22.65  | 27.34   |
| 24  | 9627147   | 9721533   | 94386  | 3              | 31.96  | 22.57  | 26.52   |

**Table S9. Highly differentiated genomic regions between Baruwal and low-land sheep breeds**

| <b>CHR</b> | <b>Start(bp)</b> | <b>End(bp)</b> | <b>Length</b> | <b>Number of SNPs</b> | <b>Max Di</b> | <b>Min Di</b> | <b>Mean Di</b> |
|------------|------------------|----------------|---------------|-----------------------|---------------|---------------|----------------|
| 1          | 249966956        | 250456371      | 489415        | 2                     | 28.44         | 24.19         | 26.31          |
| 2          | 48731082         | 48762835       | 31753         | 2                     | 24.70         | 23.46         | 24.08          |
| 2          | 52177597         | 52218919       | 41322         | 2                     | 27.01         | 22.89         | 24.95          |
| 2          | 100199475        | 100364649      | 165174        | 2                     | 26.28         | 24.65         | 25.46          |
| 2          | 139846639        | 140158515      | 311876        | 2                     | 22.83         | 22.38         | 22.61          |
| 2          | 145693768        | 145745763      | 51995         | 2                     | 26.25         | 24.96         | 25.61          |
| 2          | 146734798        | 146754173      | 19375         | 2                     | 27.33         | 25.57         | 26.45          |
| 3          | 18533662         | 18569142       | 35480         | 2                     | 27.72         | 24.13         | 25.92          |
| 3          | 134161083        | 134479165      | 318082        | 2                     | 26.88         | 25.72         | 26.30          |
| 3          | 181785624        | 181818709      | 33085         | 2                     | 22.69         | 22.41         | 22.55          |
| 4          | 13881724         | 14117077       | 235353        | 2                     | 29.93         | 25.28         | 27.61          |
| 4          | 57694339         | 57713493       | 19154         | 2                     | 27.37         | 22.55         | 24.96          |
| 5          | 42948823         | 42990841       | 42018         | 2                     | 26.17         | 26.15         | 26.16          |
| 5          | 61248799         | 61562358       | 313559        | 4                     | 30.01         | 25.29         | 27.05          |
| 5          | 63523431         | 63546724       | 23293         | 2                     | 30.51         | 25.81         | 28.16          |
| 6          | 29372590         | 29609130       | 236540        | 2                     | 31.17         | 23.18         | 27.18          |
| 7          | 57764872         | 57816492       | 51620         | 2                     | 27.83         | 23.49         | 25.66          |
| 7          | 64945291         | 65314697       | 369406        | 2                     | 24.47         | 22.91         | 23.69          |
| 7          | 89156865         | 89171610       | 14745         | 2                     | 24.62         | 24.17         | 24.40          |
| 8          | 56536992         | 56705959       | 168967        | 3                     | 27.96         | 23.38         | 25.63          |
| 9          | 27379811         | 27431994       | 52183         | 2                     | 24.16         | 22.45         | 23.31          |
| 10         | 29188403         | 29202499       | 14096         | 2                     | 32.80         | 25.44         | 29.12          |
| 11         | 43267998         | 43375182       | 107184        | 2                     | 23.87         | 22.64         | 23.26          |
| 12         | 38966266         | 39002907       | 36641         | 2                     | 25.89         | 25.72         | 25.81          |
| 12         | 74114369         | 74167822       | 53453         | 2                     | 25.81         | 23.73         | 24.77          |
| 13         | 21881830         | 22312756       | 430926        | 3                     | 27.24         | 24.33         | 25.80          |
| 13         | 26939029         | 26997342       | 58313         | 2                     | 26.69         | 23.55         | 25.12          |
| 13         | 68241391         | 68306113       | 64722         | 2                     | 24.36         | 23.23         | 23.80          |
| 13         | 74377028         | 74859132       | 482104        | 3                     | 34.31         | 25.95         | 30.45          |
| 14         | 14953941         | 15438181       | 484240        | 2                     | 23.50         | 23.33         | 23.41          |
| 16         | 56455419         | 56577830       | 122411        | 2                     | 27.83         | 22.32         | 25.08          |
| 17         | 9546160          | 9579009        | 32849         | 2                     | 28.58         | 23.16         | 25.87          |
| 17         | 29036982         | 29099210       | 62228         | 2                     | 23.18         | 22.92         | 23.05          |
| 22         | 32194893         | 32223607       | 28714         | 2                     | 24.72         | 23.24         | 23.98          |
| 23         | 47503671         | 47511740       | 8069          | 2                     | 23.03         | 23.03         | 23.03          |
| 24         | 24591560         | 24925070       | 333510        | 4                     | 28.79         | 22.32         | 26.20          |

**Table S10. Information of samples used in analysis of *FGF-7* sequence**

| <b>Sample ID</b> | <b>Population</b> | <b>Origin</b> |
|------------------|-------------------|---------------|
| OARI_ZB08        | Tibetan           | China         |
| OARI_ZD11        | Tibetan           | China         |
| OARI_CHA02       | Changthangi       | India         |
| OARI_CHA05       | Changthangi       | India         |
| OARI_BGE2        | Bangladeshi       | Bangladesh    |
| OARI_BGE4        | Bangladeshi       | Bangladesh    |
| OARI_GAR14       | Garole            |               |
| OARI_GAR4        | Indian Garole     | Indian        |
| OARI_GUR4        | Garut             | Indonesia     |
| OARI_GUR5        | Garut             | Indonesia     |
| OARI_SUM2        | Sumatra           | Indonesia     |
| OARI_SUM7        | Sumatra           | Indonesia     |

**Table S11. SNPs identified in *FGF-7* gene**

| Chr | Position | A1 | Freq (High) | Freq (Others) | A2 | P value  | Type       |
|-----|----------|----|-------------|---------------|----|----------|------------|
| 7   | 57775018 | A  | 1.000       | 0.188         | G  | 2.24E-04 | downstream |
| 7   | 57775068 | A  | 0.667       | 0.938         | T  | 1.69E-01 | downstream |
| 7   | 57775168 | A  | 1.000       | 0.313         | G  | 1.97E-03 | downstream |
| 7   | 57775230 | A  | 1.000       | 0.313         | T  | 1.97E-03 | downstream |
| 7   | 57775389 | T  | 0.625       | 0.813         | C  | 3.62E-01 | downstream |
| 7   | 57775478 | C  | 0.625       | 0.125         | A  | 2.07E-02 | downstream |
| 7   | 57775635 | T  | 0.667       | 0.938         | C  | 1.69E-01 | downstream |
| 7   | 57775680 | A  | 0.625       | 0.125         | G  | 2.07E-02 | downstream |
| 7   | 57776040 | T  | 0.625       | 0.125         | C  | 2.07E-02 | downstream |
| 7   | 57776043 | G  | 0.625       | 0.125         | A  | 2.07E-02 | downstream |
| 7   | 57776205 | G  | 0.625       | 0.125         | A  | 2.07E-02 | downstream |
| 7   | 57776247 | C  | 0.625       | 0.125         | T  | 2.07E-02 | downstream |
| 7   | 57776248 | A  | 0.625       | 0.125         | G  | 2.07E-02 | downstream |
| 7   | 57776371 | T  | 0.625       | 0.938         | C  | 9.09E-02 | downstream |
| 7   | 57776412 | T  | 0.625       | 0.125         | G  | 2.07E-02 | downstream |
| 7   | 57776523 | C  | 0.625       | 0.125         | T  | 2.07E-02 | downstream |
| 7   | 57776654 | C  | 0.625       | 0.125         | T  | 2.07E-02 | downstream |
| 7   | 57776799 | G  | 0.625       | 0.938         | C  | 9.09E-02 | downstream |
| 7   | 57776801 | T  | 0.625       | 0.125         | C  | 2.07E-02 | downstream |
| 7   | 57776868 | A  | 0.625       | 0.125         | T  | 2.07E-02 | downstream |
| 7   | 57776969 | G  | 0.625       | 0.125         | A  | 2.07E-02 | downstream |
| 7   | 57777259 | G  | 0.625       | 0.071         | A  | 1.09E-02 | downstream |
| 7   | 57777431 | C  | 0.625       | 0.125         | T  | 2.07E-02 | downstream |
| 7   | 57777565 | A  | 0.667       | 0.125         | C  | 2.54E-02 | downstream |
| 7   | 57777614 | G  | 1.000       | 0.250         | A  | 1.35E-03 | downstream |
| 7   | 57778098 | G  | 0.625       | 0.875         | T  | 2.89E-01 | downstream |
| 7   | 57778245 | G  | 1.000       | 0.286         | A  | 1.69E-03 | downstream |
| 7   | 57778594 | A  | 1.000       | 0.250         | G  | 1.35E-03 | downstream |
| 7   | 57778598 | A  | 0.625       | 0.125         | C  | 2.07E-02 | downstream |
| 7   | 57778602 | G  | 0.625       | 0.125         | A  | 2.07E-02 | downstream |
| 7   | 57778788 | T  | 0.625       | 0.125         | C  | 2.07E-02 | downstream |
| 7   | 57779093 | T  | 0.625       | 0.125         | C  | 2.07E-02 | downstream |
| 7   | 57779150 | G  | 0.625       | 0.125         | C  | 2.07E-02 | downstream |
| 7   | 57779453 | T  | 0.625       | 0.125         | C  | 2.07E-02 | downstream |
| 7   | 57779927 | G  | 0.625       | 0.125         | A  | 2.07E-02 | downstream |
| 7   | 57780357 | T  | 0.625       | 0.125         | G  | 2.07E-02 | UTR3       |
| 7   | 57780557 | T  | 0.625       | 0.125         | C  | 2.07E-02 | exonic     |
| 7   | 57780888 | T  | 1.000       | 0.250         | C  | 1.35E-03 | intronic   |
| 7   | 57780917 | T  | 0.625       | 0.875         | G  | 2.89E-01 | intronic   |
| 7   | 57780946 | C  | 0.625       | 0.938         | A  | 9.09E-02 | intronic   |

|   |          |   |       |       |   |          |          |
|---|----------|---|-------|-------|---|----------|----------|
| 7 | 57780971 | C | 0.625 | 0.938 | T | 9.09E-02 | intronic |
| 7 | 57781545 | G | 0.625 | 0.938 | A | 9.09E-02 | intronic |
| 7 | 57781719 | A | 0.625 | 0.125 | G | 2.07E-02 | intronic |
| 7 | 57782555 | A | 0.833 | 0.125 | G | 4.32E-03 | intronic |
| 7 | 57782869 | G | 0.625 | 0.125 | A | 2.07E-02 | intronic |
| 7 | 57782948 | A | 0.625 | 0.875 | G | 2.89E-01 | intronic |
| 7 | 57783024 | T | 0.625 | 0.125 | G | 2.07E-02 | intronic |
| 7 | 57783483 | T | 1.000 | 0.313 | G | 1.97E-03 | intronic |
| 7 | 57783679 | A | 0.625 | 0.875 | G | 2.89E-01 | intronic |
| 7 | 57783832 | G | 0.625 | 0.875 | A | 2.89E-01 | intronic |
| 7 | 57784005 | G | 0.625 | 0.875 | C | 2.89E-01 | intronic |
| 7 | 57784007 | G | 0.625 | 0.857 | T | 3.09E-01 | intronic |
| 7 | 57784047 | G | 0.625 | 0.125 | A | 2.07E-02 | intronic |
| 7 | 57784147 | C | 0.625 | 0.875 | T | 2.89E-01 | intronic |
| 7 | 57784599 | A | 0.625 | 0.125 | G | 2.07E-02 | intronic |
| 7 | 57784617 | A | 0.625 | 0.125 | G | 2.07E-02 | intronic |
| 7 | 57784734 | A | 0.625 | 0.875 | G | 2.89E-01 | intronic |
| 7 | 57784985 | G | 1.000 | 0.250 | A | 1.35E-03 | intronic |
| 7 | 57785176 | A | 0.625 | 0.875 | G | 2.89E-01 | intronic |
| 7 | 57785244 | T | 0.625 | 0.071 | C | 1.09E-02 | intronic |
| 7 | 57785507 | G | 0.625 | 0.875 | A | 2.89E-01 | intronic |
| 7 | 57785940 | A | 1.000 | 0.250 | G | 1.35E-03 | intronic |
| 7 | 57786301 | T | 0.625 | 0.875 | G | 2.89E-01 | intronic |
| 7 | 57786468 | G | 0.625 | 0.125 | A | 2.07E-02 | intronic |
| 7 | 57787035 | A | 0.625 | 0.875 | T | 2.89E-01 | intronic |
| 7 | 57787049 | T | 0.625 | 0.875 | C | 2.89E-01 | intronic |
| 7 | 57787297 | T | 0.625 | 0.875 | C | 2.89E-01 | intronic |
| 7 | 57787298 | G | 0.625 | 0.875 | A | 2.89E-01 | intronic |
| 7 | 57787393 | T | 0.625 | 0.875 | C | 2.89E-01 | intronic |
| 7 | 57788007 | G | 1.000 | 0.250 | A | 1.35E-03 | intronic |
| 7 | 57788150 | G | 0.625 | 0.875 | A | 2.89E-01 | intronic |
| 7 | 57788204 | G | 0.625 | 0.938 | C | 9.09E-02 | intronic |
| 7 | 57788328 | A | 0.625 | 0.125 | C | 2.07E-02 | intronic |
| 7 | 57788401 | T | 0.625 | 0.875 | C | 2.89E-01 | intronic |
| 7 | 57788520 | G | 0.625 | 0.143 | A | 5.24E-02 | intronic |
| 7 | 57788734 | G | 0.625 | 0.125 | T | 2.07E-02 | intronic |
| 7 | 57788781 | T | 0.625 | 0.875 | G | 2.89E-01 | intronic |
| 7 | 57788963 | C | 0.625 | 0.143 | T | 5.24E-02 | intronic |
| 7 | 57789030 | A | 0.625 | 0.125 | C | 2.07E-02 | intronic |
| 7 | 57789182 | G | 0.625 | 0.929 | C | 1.17E-01 | intronic |
| 7 | 57789241 | A | 1.000 | 0.250 | G | 1.35E-03 | intronic |
| 7 | 57789295 | G | 0.625 | 0.125 | T | 2.07E-02 | intronic |
| 7 | 57789795 | A | 1.000 | 0.313 | G | 1.97E-03 | intronic |

|   |          |   |       |       |   |          |          |
|---|----------|---|-------|-------|---|----------|----------|
| 7 | 57789811 | G | 0.625 | 0.125 | T | 2.07E-02 | intronic |
| 7 | 57789934 | A | 0.625 | 0.875 | C | 2.89E-01 | intronic |
| 7 | 57789985 | A | 1.000 | 0.313 | T | 1.97E-03 | intronic |
| 7 | 57790004 | A | 1.000 | 0.313 | G | 1.97E-03 | intronic |
| 7 | 57790276 | T | 1.000 | 0.313 | A | 1.97E-03 | intronic |
| 7 | 57790587 | C | 0.625 | 0.250 | A | 9.94E-02 | intronic |
| 7 | 57790604 | T | 0.625 | 0.250 | C | 9.94E-02 | intronic |
| 7 | 57790889 | A | 0.625 | 0.938 | G | 9.09E-02 | intronic |
| 7 | 57790895 | C | 0.625 | 0.938 | T | 9.09E-02 | intronic |
| 7 | 57791333 | T | 1.000 | 0.313 | A | 1.97E-03 | intronic |
| 7 | 57791679 | C | 0.625 | 0.250 | A | 9.94E-02 | intronic |
| 7 | 57791794 | A | 0.625 | 0.250 | T | 9.94E-02 | intronic |
| 7 | 57791818 | G | 0.625 | 0.938 | A | 9.09E-02 | intronic |
| 7 | 57792079 | A | 1.000 | 0.875 | C | 5.36E-01 | intronic |
| 7 | 57792171 | T | 0.625 | 0.938 | C | 9.09E-02 | intronic |
| 7 | 57792535 | G | 0.625 | 0.938 | A | 9.09E-02 | intronic |
| 7 | 57792542 | C | 1.000 | 0.313 | T | 1.97E-03 | intronic |
| 7 | 57792555 | C | 0.625 | 0.125 | A | 2.07E-02 | intronic |
| 7 | 57792649 | G | 0.625 | 0.125 | A | 2.07E-02 | intronic |
| 7 | 57792875 | G | 0.625 | 0.938 | T | 9.09E-02 | intronic |
| 7 | 57792886 | A | 0.625 | 0.143 | G | 5.24E-02 | intronic |
| 7 | 57793139 | A | 0.625 | 0.125 | G | 2.07E-02 | intronic |
| 7 | 57793389 | G | 1.000 | 0.188 | A | 2.24E-04 | intronic |
| 7 | 57793461 | T | 0.625 | 0.125 | A | 2.07E-02 | intronic |
| 7 | 57793519 | G | 0.625 | 0.125 | A | 2.07E-02 | intronic |
| 7 | 57793528 | A | 1.000 | 0.188 | G | 2.24E-04 | intronic |
| 7 | 57793556 | A | 0.625 | 0.125 | G | 2.07E-02 | intronic |
| 7 | 57793618 | C | 0.625 | 0.125 | G | 2.07E-02 | intronic |
| 7 | 57793649 | C | 0.625 | 0.125 | T | 2.07E-02 | intronic |
| 7 | 57793928 | T | 0.625 | 0.125 | C | 2.07E-02 | intronic |
| 7 | 57793944 | T | 0.625 | 0.938 | A | 9.09E-02 | intronic |
| 7 | 57793957 | A | 0.625 | 0.125 | G | 2.07E-02 | intronic |
| 7 | 57794004 | A | 0.625 | 0.938 | G | 9.09E-02 | intronic |
| 7 | 57794078 | C | 1.000 | 0.875 | A | 5.36E-01 | intronic |
| 7 | 57794136 | T | 1.000 | 0.875 | G | 5.36E-01 | intronic |
| 7 | 57794198 | C | 1.000 | 0.875 | T | 5.36E-01 | intronic |
| 7 | 57794291 | C | 1.000 | 0.875 | A | 5.36E-01 | intronic |
| 7 | 57794483 | A | 1.000 | 0.875 | G | 5.36E-01 | intronic |
| 7 | 57794519 | A | 0.625 | 0.938 | C | 9.09E-02 | intronic |
| 7 | 57794525 | A | 1.000 | 0.875 | G | 5.36E-01 | intronic |
| 7 | 57794690 | G | 1.000 | 0.875 | A | 5.36E-01 | intronic |
| 7 | 57795314 | G | 0.625 | 0.938 | T | 9.09E-02 | intronic |
| 7 | 57795346 | C | 1.000 | 0.875 | T | 5.36E-01 | intronic |



|   |          |   |       |       |   |          |          |
|---|----------|---|-------|-------|---|----------|----------|
| 7 | 57795437 | C | 1.000 | 0.875 | T | 5.36E-01 | intronic |
| 7 | 57795614 | C | 1.000 | 0.875 | T | 5.36E-01 | intronic |
| 7 | 57795660 | C | 1.000 | 0.875 | T | 5.36E-01 | intronic |
| 7 | 57796255 | G | 1.000 | 0.875 | A | 5.36E-01 | intronic |
| 7 | 57796591 | A | 1.000 | 0.875 | C | 5.36E-01 | intronic |
| 7 | 57796593 | G | 1.000 | 0.875 | A | 5.36E-01 | intronic |
| 7 | 57796612 | G | 1.000 | 0.875 | A | 5.36E-01 | intronic |
| 7 | 57796747 | C | 0.625 | 0.125 | T | 2.07E-02 | intronic |
| 7 | 57796808 | T | 0.625 | 0.938 | C | 9.09E-02 | intronic |
| 7 | 57797484 | A | 1.000 | 0.875 | G | 5.36E-01 | intronic |
| 7 | 57797489 | G | 1.000 | 0.313 | A | 1.97E-03 | intronic |
| 7 | 57797667 | G | 1.000 | 0.875 | A | 5.36E-01 | intronic |
| 7 | 57798166 | G | 1.000 | 0.875 | C | 5.36E-01 | intronic |
| 7 | 57798228 | G | 0.625 | 0.125 | A | 2.07E-02 | intronic |
| 7 | 57798240 | A | 1.000 | 0.875 | G | 5.36E-01 | intronic |
| 7 | 57798300 | G | 1.000 | 0.875 | A | 5.36E-01 | intronic |
| 7 | 57798572 | A | 0.625 | 0.071 | C | 1.09E-02 | intronic |
| 7 | 57798705 | C | 1.000 | 0.875 | T | 5.36E-01 | intronic |
| 7 | 57798831 | G | 0.625 | 0.125 | C | 2.07E-02 | intronic |
| 7 | 57798941 | G | 1.000 | 0.875 | A | 5.36E-01 | intronic |
| 7 | 57798991 | A | 1.000 | 0.875 | G | 5.36E-01 | intronic |
| 7 | 57799016 | A | 0.625 | 0.938 | G | 9.09E-02 | intronic |
| 7 | 57799134 | T | 0.625 | 0.125 | G | 2.07E-02 | intronic |
| 7 | 57799147 | A | 1.000 | 0.125 | G | 3.75E-04 | intronic |
| 7 | 57799170 | C | 1.000 | 0.313 | T | 1.97E-03 | intronic |
| 7 | 57799180 | A | 1.000 | 0.875 | G | 5.36E-01 | intronic |
| 7 | 57799527 | A | 1.000 | 0.313 | G | 1.97E-03 | intronic |
| 7 | 57799544 | G | 0.625 | 0.938 | C | 9.09E-02 | intronic |
| 7 | 57800056 | A | 1.000 | 0.875 | T | 5.36E-01 | intronic |
| 7 | 57800106 | G | 1.000 | 0.875 | A | 5.36E-01 | intronic |
| 7 | 57800141 | G | 1.000 | 0.875 | A | 5.36E-01 | intronic |
| 7 | 57800335 | A | 1.000 | 0.875 | G | 5.36E-01 | intronic |
| 7 | 57800770 | A | 1.000 | 0.875 | G | 5.36E-01 | intronic |
| 7 | 57800820 | G | 1.000 | 0.875 | T | 5.36E-01 | intronic |
| 7 | 57801015 | A | 0.625 | 0.125 | G | 2.07E-02 | intronic |
| 7 | 57801137 | A | 0.625 | 0.125 | G | 2.07E-02 | intronic |
| 7 | 57801469 | C | 0.625 | 0.938 | T | 9.09E-02 | intronic |
| 7 | 57801495 | T | 1.000 | 0.875 | C | 5.36E-01 | intronic |
| 7 | 57801908 | C | 0.625 | 0.929 | T | 1.17E-01 | intronic |
| 7 | 57802257 | G | 1.000 | 0.313 | A | 1.97E-03 | intronic |
| 7 | 57802419 | C | 0.625 | 0.938 | T | 9.09E-02 | intronic |
| 7 | 57802466 | G | 1.000 | 0.875 | A | 5.36E-01 | intronic |
| 7 | 57802578 | G | 0.625 | 0.938 | C | 9.09E-02 | intronic |

|   |          |   |       |       |   |          |          |
|---|----------|---|-------|-------|---|----------|----------|
| 7 | 57802774 | C | 0.625 | 0.125 | T | 2.07E-02 | intronic |
| 7 | 57802876 | A | 0.625 | 0.813 | C | 3.62E-01 | intronic |
| 7 | 57803097 | T | 0.625 | 0.938 | G | 9.09E-02 | intronic |
| 7 | 57803109 | A | 0.625 | 0.125 | T | 2.07E-02 | intronic |
| 7 | 57803147 | T | 0.625 | 0.125 | A | 2.07E-02 | intronic |
| 7 | 57803439 | T | 1.000 | 0.375 | C | 6.43E-03 | intronic |
| 7 | 57803456 | G | 0.625 | 0.938 | A | 9.09E-02 | intronic |
| 7 | 57803552 | T | 0.625 | 0.813 | C | 3.62E-01 | intronic |
| 7 | 57803564 | C | 0.625 | 0.938 | T | 9.09E-02 | intronic |
| 7 | 57803661 | G | 1.000 | 0.313 | A | 1.97E-03 | intronic |
| 7 | 57803687 | G | 1.000 | 0.313 | A | 1.97E-03 | intronic |
| 7 | 57803711 | G | 1.000 | 0.313 | A | 1.97E-03 | intronic |
| 7 | 57803731 | A | 0.625 | 0.938 | G | 9.09E-02 | intronic |
| 7 | 57803782 | C | 0.625 | 0.125 | T | 2.07E-02 | intronic |
| 7 | 57804226 | A | 0.625 | 0.125 | G | 2.07E-02 | intronic |
| 7 | 57804316 | G | 0.625 | 0.938 | A | 9.09E-02 | intronic |
| 7 | 57804518 | C | 0.625 | 0.125 | T | 2.07E-02 | intronic |
| 7 | 57805065 | G | 0.625 | 0.125 | T | 2.07E-02 | intronic |
| 7 | 57805457 | C | 1.000 | 0.313 | T | 1.97E-03 | intronic |
| 7 | 57805498 | C | 0.625 | 0.938 | T | 9.09E-02 | intronic |
| 7 | 57805607 | G | 0.625 | 0.125 | T | 2.07E-02 | intronic |
| 7 | 57805651 | T | 0.625 | 0.125 | C | 2.07E-02 | intronic |
| 7 | 57806548 | A | 0.625 | 0.125 | C | 2.07E-02 | intronic |
| 7 | 57806869 | C | 0.625 | 0.938 | T | 9.09E-02 | intronic |
| 7 | 57806887 | G | 0.625 | 0.125 | C | 2.07E-02 | intronic |
| 7 | 57806993 | T | 0.625 | 0.125 | C | 2.07E-02 | intronic |
| 7 | 57807019 | T | 0.625 | 0.125 | C | 2.07E-02 | intronic |
| 7 | 57807165 | T | 0.625 | 0.125 | A | 2.07E-02 | intronic |
| 7 | 57807191 | G | 0.625 | 0.125 | A | 2.07E-02 | intronic |
| 7 | 57807201 | T | 0.625 | 0.125 | C | 2.07E-02 | intronic |
| 7 | 57807256 | G | 0.625 | 0.938 | A | 9.09E-02 | intronic |
| 7 | 57807270 | A | 0.625 | 0.125 | C | 2.07E-02 | intronic |
| 7 | 57807314 | T | 0.625 | 0.125 | A | 2.07E-02 | intronic |
| 7 | 57807324 | G | 1.000 | 0.188 | A | 2.24E-04 | intronic |
| 7 | 57807420 | T | 0.625 | 0.125 | C | 2.07E-02 | intronic |
| 7 | 57807424 | T | 0.625 | 0.938 | A | 9.09E-02 | intronic |
| 7 | 57807515 | G | 0.625 | 0.125 | A | 2.07E-02 | intronic |
| 7 | 57807541 | A | 0.625 | 0.125 | C | 2.07E-02 | intronic |
| 7 | 57807585 | A | 0.625 | 0.125 | G | 2.07E-02 | intronic |
| 7 | 57807908 | T | 1.000 | 0.250 | C | 1.35E-03 | intronic |
| 7 | 57807960 | G | 1.000 | 0.188 | T | 2.24E-04 | intronic |
| 7 | 57808082 | G | 1.000 | 0.875 | A | 5.36E-01 | intronic |
| 7 | 57809459 | C | 0.625 | 0.938 | T | 9.09E-02 | intronic |

|   |          |   |       |       |   |          |          |
|---|----------|---|-------|-------|---|----------|----------|
| 7 | 57809897 | C | 0.625 | 0.938 | A | 9.09E-02 | intronic |
| 7 | 57809954 | A | 0.625 | 0.938 | G | 9.09E-02 | intronic |
| 7 | 57810413 | A | 0.625 | 0.143 | G | 5.24E-02 | intronic |
| 7 | 57810485 | G | 1.000 | 0.313 | A | 1.97E-03 | intronic |
| 7 | 57810967 | G | 1.000 | 0.250 | T | 1.35E-03 | intronic |
| 7 | 57811135 | C | 1.000 | 0.375 | T | 6.43E-03 | intronic |
| 7 | 57811164 | G | 1.000 | 0.313 | A | 1.97E-03 | intronic |
| 7 | 57811298 | A | 0.625 | 0.938 | C | 9.09E-02 | intronic |
| 7 | 57812157 | C | 1.000 | 0.250 | T | 1.35E-03 | intronic |
| 7 | 57812216 | A | 1.000 | 0.250 | G | 1.35E-03 | intronic |
| 7 | 57812355 | G | 1.000 | 0.250 | A | 1.35E-03 | intronic |
| 7 | 57812639 | T | 1.000 | 0.250 | C | 1.35E-03 | intronic |
| 7 | 57812772 | C | 1.000 | 0.250 | T | 1.35E-03 | intronic |
| 7 | 57813105 | T | 0.625 | 0.125 | C | 2.07E-02 | intronic |
| 7 | 57813614 | T | 0.625 | 0.125 | C | 2.07E-02 | intronic |
| 7 | 57814308 | G | 0.625 | 0.929 | A | 1.17E-01 | intronic |
| 7 | 57814325 | T | 0.625 | 0.500 | C | 6.75E-01 | intronic |
| 7 | 57814371 | C | 0.625 | 0.857 | A | 3.09E-01 | intronic |
| 7 | 57814439 | G | 0.625 | 0.643 | A | 1.00E+00 | intronic |
| 7 | 57814441 | G | 0.625 | 0.643 | A | 1.00E+00 | intronic |
| 7 | 57814533 | C | 0.625 | 0.750 | T | 6.47E-01 | intronic |
| 7 | 57814562 | G | 0.875 | 0.813 | A | 1.00E+00 | intronic |
| 7 | 57815226 | T | 0.750 | 0.125 | A | 4.74E-03 | intronic |
| 7 | 57815228 | A | 0.750 | 0.125 | G | 4.74E-03 | intronic |
| 7 | 57815376 | G | 0.750 | 1.000 | A | 1.01E-01 | intronic |
| 7 | 57815489 | G | 0.750 | 0.063 | A | 1.32E-03 | intronic |
| 7 | 57815570 | C | 0.750 | 1.000 | A | 1.01E-01 | intronic |
| 7 | 57816040 | A | 0.750 | 0.063 | G | 1.32E-03 | intronic |
| 7 | 57816492 | T | 0.750 | 0.063 | C | 1.32E-03 | intronic |
| 7 | 57816974 | G | 1.000 | 0.313 | A | 1.97E-03 | intronic |
| 7 | 57817884 | A | 0.750 | 0.063 | G | 1.32E-03 | intronic |
| 7 | 57817978 | A | 1.000 | 0.875 | T | 5.36E-01 | intronic |
| 7 | 57818293 | A | 0.750 | 0.063 | G | 1.32E-03 | intronic |
| 7 | 57818516 | A | 0.750 | 0.063 | G | 1.32E-03 | intronic |
| 7 | 57819556 | A | 0.750 | 1.000 | G | 1.01E-01 | intronic |
| 7 | 57819756 | G | 0.750 | 1.000 | A | 1.01E-01 | intronic |
| 7 | 57821506 | A | 1.000 | 0.063 | T | 1.22E-05 | intronic |
| 7 | 57821577 | T | 0.750 | 0.063 | G | 1.32E-03 | intronic |
| 7 | 57821717 | T | 1.000 | 0.250 | C | 1.35E-03 | intronic |
| 7 | 57821805 | C | 0.750 | 1.000 | T | 1.01E-01 | intronic |
| 7 | 57822203 | C | 1.000 | 0.875 | T | 5.36E-01 | intronic |
| 7 | 57822679 | C | 1.000 | 0.313 | T | 1.97E-03 | intronic |
| 7 | 57823409 | C | 0.750 | 0.063 | T | 1.32E-03 | intronic |

|   |          |   |       |       |   |          |          |
|---|----------|---|-------|-------|---|----------|----------|
| 7 | 57823568 | G | 1.000 | 0.063 | A | 1.22E-05 | intronic |
| 7 | 57824220 | G | 0.750 | 1.000 | C | 1.01E-01 | intronic |
| 7 | 57824362 | T | 1.000 | 0.063 | C | 1.22E-05 | intronic |
| 7 | 57824506 | C | 1.000 | 0.063 | T | 1.22E-05 | intronic |
| 7 | 57824633 | T | 0.750 | 0.063 | C | 1.32E-03 | intronic |
| 7 | 57825084 | T | 0.750 | 0.000 | G | 3.75E-04 | intronic |
| 7 | 57825268 | G | 0.750 | 0.063 | A | 1.32E-03 | intronic |
| 7 | 57825328 | T | 1.000 | 0.875 | C | 5.36E-01 | intronic |
| 7 | 57825562 | C | 1.000 | 0.875 | T | 5.36E-01 | intronic |
| 7 | 57825695 | T | 0.750 | 0.063 | A | 1.32E-03 | intronic |
| 7 | 57826956 | A | 0.750 | 0.063 | G | 1.32E-03 | intronic |
| 7 | 57827390 | C | 0.750 | 0.000 | T | 3.75E-04 | intronic |
| 7 | 57827438 | T | 0.750 | 0.063 | C | 1.32E-03 | intronic |
| 7 | 57827549 | C | 0.750 | 1.000 | T | 1.01E-01 | intronic |
| 7 | 57827663 | A | 1.000 | 0.063 | G | 1.22E-05 | intronic |
| 7 | 57827783 | G | 0.750 | 0.063 | A | 1.32E-03 | intronic |
| 7 | 57827820 | C | 0.750 | 1.000 | T | 1.01E-01 | intronic |
| 7 | 57828090 | T | 1.000 | 0.063 | C | 1.22E-05 | intronic |
| 7 | 57828134 | C | 1.000 | 0.250 | T | 1.35E-03 | intronic |
| 7 | 57828245 | G | 0.750 | 0.063 | C | 1.32E-03 | intronic |
| 7 | 57828573 | C | 0.750 | 1.000 | T | 1.01E-01 | intronic |
| 7 | 57828582 | T | 1.000 | 0.875 | G | 5.36E-01 | intronic |
| 7 | 57829238 | G | 1.000 | 0.063 | T | 1.22E-05 | intronic |
| 7 | 57829330 | T | 0.750 | 1.000 | A | 1.01E-01 | intronic |
| 7 | 57831166 | A | 0.750 | 1.000 | C | 1.01E-01 | intronic |
| 7 | 57831958 | T | 0.750 | 0.063 | C | 1.32E-03 | intronic |
| 7 | 57832031 | A | 1.000 | 0.063 | G | 1.22E-05 | intronic |
| 7 | 57832174 | A | 1.000 | 0.063 | C | 1.22E-05 | intronic |
| 7 | 57832504 | G | 0.750 | 0.063 | A | 1.32E-03 | intronic |
| 7 | 57833558 | G | 1.000 | 0.063 | A | 1.22E-05 | intronic |
| 7 | 57833677 | A | 0.750 | 0.063 | G | 1.32E-03 | intronic |
| 7 | 57833838 | C | 1.000 | 0.063 | T | 1.22E-05 | intronic |
| 7 | 57835192 | A | 0.750 | 1.000 | G | 1.01E-01 | intronic |
| 7 | 57836987 | A | 0.750 | 1.000 | G | 1.01E-01 | intronic |
| 7 | 57837504 | G | 1.000 | 0.063 | A | 1.22E-05 | intronic |
| 7 | 57838457 | T | 1.000 | 0.875 | A | 5.36E-01 | intronic |
| 7 | 57838459 | C | 1.000 | 0.188 | T | 2.24E-04 | intronic |
| 7 | 57838485 | T | 0.750 | 1.000 | C | 1.01E-01 | intronic |
| 7 | 57838986 | A | 0.750 | 0.063 | T | 1.32E-03 | intronic |
| 7 | 57839255 | T | 1.000 | 0.063 | G | 1.22E-05 | intronic |
| 7 | 57839520 | A | 0.750 | 1.000 | G | 1.01E-01 | intronic |
| 7 | 57839819 | T | 0.750 | 1.000 | C | 1.01E-01 | intronic |
| 7 | 57840274 | G | 0.750 | 1.000 | A | 1.01E-01 | intronic |

|          |                 |          |              |              |          |                 |          |
|----------|-----------------|----------|--------------|--------------|----------|-----------------|----------|
| 7        | 57841088        | A        | 1.000        | 0.750        | C        | 2.62E-01        | intronic |
| 7        | 57842782        | A        | 0.750        | 1.000        | G        | 1.01E-01        | upstream |
| 7        | 57842788        | T        | 0.750        | 1.000        | C        | 1.01E-01        | upstream |
| 7        | 57842871        | G        | 0.750        | 0.250        | A        | 3.24E-02        | upstream |
| 7        | 57842893        | C        | 0.750        | 0.063        | T        | 1.32E-03        | upstream |
| 7        | 57843431        | T        | 0.750        | 1.000        | G        | 1.01E-01        | upstream |
| 7        | 57843456        | G        | 0.750        | 0.063        | A        | 1.32E-03        | upstream |
| 7        | 57843555        | T        | 0.750        | 1.000        | C        | 1.01E-01        | upstream |
| <b>7</b> | <b>57843681</b> | <b>A</b> | <b>1.000</b> | <b>0.063</b> | <b>T</b> | <b>9.38E-05</b> | upstream |
| 7        | 57843718        | A        | 1.000        | 0.250        | G        | 1.35E-03        | upstream |
| 7        | 57844175        | C        | 0.750        | 0.063        | T        | 1.32E-03        | upstream |
| 7        | 57844343        | C        | 0.750        | 0.250        | G        | 3.24E-02        | upstream |
| 7        | 57844418        | G        | 0.750        | 0.250        | A        | 3.24E-02        | upstream |
| 7        | 57844466        | T        | 0.750        | 0.250        | C        | 3.24E-02        | upstream |
| 7        | 57844474        | T        | 0.750        | 0.250        | C        | 3.24E-02        | upstream |
| 7        | 57844672        | G        | 0.750        | 0.063        | A        | 1.32E-03        | upstream |
| 7        | 57844777        | A        | 0.750        | 0.063        | G        | 1.32E-03        | upstream |
| 7        | 57844796        | G        | 0.750        | 0.063        | C        | 1.32E-03        | upstream |
| 7        | 57845008        | C        | 0.750        | 0.250        | T        | 3.24E-02        | upstream |
| 7        | 57845105        | T        | 0.750        | 0.250        | A        | 3.24E-02        | upstream |
| 7        | 57845189        | G        | 1.000        | 0.250        | A        | 1.35E-03        | upstream |
| 7        | 57845232        | G        | 0.750        | 0.250        | A        | 3.24E-02        | upstream |
| 7        | 57845269        | T        | 0.750        | 0.250        | C        | 3.24E-02        | upstream |
| 7        | 57845497        | T        | 0.750        | 0.250        | C        | 3.24E-02        | upstream |
| 7        | 57845863        | A        | 0.750        | 0.250        | C        | 3.24E-02        | upstream |
| 7        | 57845981        | G        | 0.750        | 0.250        | A        | 3.24E-02        | upstream |
| 7        | 57846117        | C        | 1.000        | 0.250        | T        | 1.35E-03        | upstream |
| 7        | 57846357        | T        | 0.750        | 0.250        | A        | 3.24E-02        | upstream |
| 7        | 57846413        | T        | 1.000        | 0.813        | C        | 5.26E-01        | upstream |
| 7        | 57846450        | A        | 1.000        | 0.813        | C        | 5.26E-01        | upstream |
| 7        | 57846495        | A        | 0.750        | 1.000        | G        | 1.01E-01        | upstream |

Notes: A1, dominant allele in high-altitude sheep; A2, the alternative allele; Significant SNPs ( $P < 0.001$ ) are colored "red".

**Talbe S12. Predicted Transcription Factor Binding Sites (TFBs) for the upstream mutation in *FGF-7***

| <b>TFBIND prediction created binding sites</b> | <b>TFBIND prediction removed binding sites</b>    |
|------------------------------------------------|---------------------------------------------------|
| CEBPB (CCAAT enhancer-binding protein)         | TAX/CREB                                          |
| OCT (octamer-binding protein)                  | XBP1 (X-box binding protein 1)                    |
| YY1 (Yin Yang-1)                               | ARNT (AhR nuclear translocator)                   |
| IRF1 (Interferon regulatory factor)            | CREBP1 (Activating transcription factor-2)        |
| E2_Q6                                          | CREB (cAMP response element binding element site) |
|                                                | PBX1                                              |
|                                                | XFD1 ( <i>Xenopus Fork head Domain</i> )          |
|                                                | HFH1 ( <i>Fork head homolog</i> )                 |
